# Supplementary material for: Alternative Benzoxazole Assembly Discovered in Anaerobic Bacteria Provides Access to Privileged Heterocyclic Scaffold
Source: PubMed Central journal article supplement — Angew Chem Int Ed Engl. 2022 Jun 28;61(32):e202205409. doi: 10.1002/anie.202205409 (PMC9400959; doi:10.1002/anie.202205409), 2022-06-28
Supplement: ANIE-61-0-s001.pdf [file ANIE-61-0-s001.pdf]

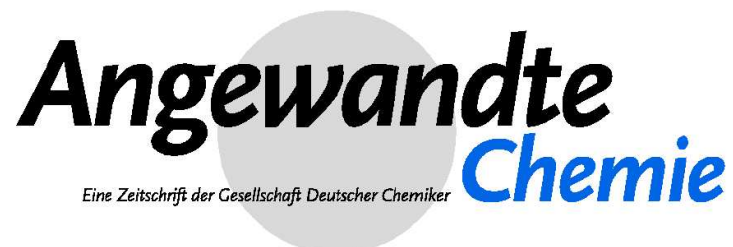

## Supporting Information

### **Alternative Benzoxazole Assembly Discovered in Anaerobic Bacteria Provides Access to Privileged Heterocyclic Scaffold**

*T. Horch, E. M. Molloy, F. Bredy, V. G. Haensch, K. Scherlach, K. L. Dunbar, J. Franke, C. Hertweck\**

|                                                                                                                                                                           |    |
|---------------------------------------------------------------------------------------------------------------------------------------------------------------------------|----|
| <b>Experimental Procedures</b> .....                                                                                                                                      | 3  |
| <b>Results and Discussion</b> .....                                                                                                                                       | 20 |
| <b>Figure S1.</b> Metabolite profiles of extracts from <i>C. cavendishii</i> cultivated under varying conditions. ....                                                    | 20 |
| <b>Figure S2.</b> UV/Vis spectra of closoxazoles produced by <i>C. cavendishii</i> . ....                                                                                 | 21 |
| <b>Figure S3.</b> MS/MS fragmentation patterns of closoxazoles from <i>C. cavendishii</i> . ....                                                                          | 22 |
| <b>Figure S4.</b> Alternative C-atom numbering of <b>11</b> and <b>12</b> . ....                                                                                          | 23 |
| <b>Figure S5.</b> Comparison of the synthetic reference compound of <b>11</b> and <b>11</b> isolated from <i>C. cavendishii</i> Rif1 .....                                | 24 |
| <b>Figure S6.</b> Detection of closoxazoles in <i>C. cavendishii</i> Rif1 and <i>C. cavendishii</i> Rif1 $\Delta$ <i>clxA</i> extracts. ....                              | 27 |
| <b>Figure S7.</b> Production of closoxazole A and B by <i>C. cavendishii</i> Rif1 and <i>E. coli</i> pET28a- <i>clxA</i> - <i>E</i> . ....                                | 28 |
| <b>Figure S8.</b> Production of closoxazole A ( <b>11</b> ) and B ( <b>12</b> ) by <i>E. coli</i> encoding the listed combinations of <i>clx</i> biosynthetic genes. .... | 29 |
| <b>Figure S9.</b> Production of 3,4-AHBA by <i>E. coli</i> pET- <i>clxBE</i> . ....                                                                                       | 30 |
| <b>Figure S10.</b> Detection of benzoxazole dimer <b>22</b> in <i>E. coli</i> pET- <i>clxABDE</i> extracts. ....                                                          | 31 |
| <b>Figure S11.</b> MS/MS fragmentation patterns of synthetic and <i>E. coli</i> -derived benzoxazole dimers <b>22</b> . ....                                              | 32 |
| <b>Figure S12.</b> HR-LCMS analysis of synthetic reference of <b>22–24</b> and heterologously produced <b>22–24</b> . ....                                                | 33 |
| <b>Figure S13.</b> Supplementation of <i>E. coli</i> pET- <i>clxA</i> with the benzoxazole dimer <b>22</b> . ....                                                         | 34 |
| <b>Figure S14.</b> Sequence alignment of ClxA ( <i>C. cavendishii</i> ), NatL2 ( <i>Streptomyces</i> sp. Tü6176) and BomJ ( <i>S. sp.</i> NRRL12068). ....                | 35 |
| <b>Figure S15.</b> Detection of the trimer <b>24</b> produced by <i>E. coli</i> pET- <i>clxABCE</i> . ....                                                                | 36 |
| <b>Figure S16.</b> MS/MS fragmentation patterns of synthetic and heterologously produced amide dimer <b>23</b> . ....                                                     | 37 |
| <b>Figure S17.</b> MS/MS fragmentation patterns of synthetic and heterologously produced trimer <b>24</b> . ....                                                          | 38 |
| <b>Figure S18.</b> Supplementation of <i>E. coli</i> pET- <i>clxD</i> with the closoxazole A ( <b>11</b> ). ....                                                          | 39 |
| <b>Figure S19.</b> MS/MS fragmentation pattern of putative benzoxazole carrying two heterocycles. ....                                                                    | 40 |
| <b>Figure S20.</b> Supplementation of <i>E. coli</i> pET- <i>clxD</i> with the trimer <b>24</b> . ....                                                                    | 41 |
| <b>Figure S21.</b> Detection of amide dimer <b>23</b> in crude extracts of <i>E. coli</i> pET- <i>clxBE</i> . ....                                                        | 42 |
| <b>Figure S22.</b> Detection of amide conjugates composed of two and three 3,4-AHBA units. ....                                                                           | 43 |
| <b>Figure S23.</b> Detection of deuterated PABA incorporation into closoxazole B and its respective dimer benzoxazole. ....                                               | 44 |
| <b>Figure S24.</b> Detection of a putative benzoxazole dimer derived from PABA and 3,4-AHBA. ....                                                                         | 45 |
| <b>Figure S25.</b> ESI-MS (positive ion mode) of isolated <b>25</b> . ....                                                                                                | 46 |
| <b>Figure S26.</b> <sup>1</sup> H-NMR spectrum of <b>11</b> isolated from <i>C. cavendishii</i> Rif1 .....                                                                | 47 |
| <b>Figure S27.</b> <sup>13</sup> C-NMR spectrum of <b>11</b> . ....                                                                                                       | 47 |
| <b>Figure S28.</b> DEPT-135 NMR spectrum of <b>11</b> . ....                                                                                                              | 48 |
| <b>Figure S29.</b> <sup>1</sup> H, <sup>1</sup> H COSY NMR spectrum of <b>11</b> . ....                                                                                   | 48 |
| <b>Figure S30.</b> <sup>1</sup> H, <sup>13</sup> C HSQC NMR spectrum of <b>11</b> . ....                                                                                  | 49 |
| <b>Figure S31.</b> <sup>1</sup> H, <sup>13</sup> C HMBC NMR spectrum of <b>11</b> . ....                                                                                  | 49 |
| <b>Figure S32.</b> <sup>1</sup> H spectrum of <b>12</b> isolated from <i>C. cavendishii</i> Rif1 .....                                                                    | 50 |
| <b>Figure S33.</b> <sup>13</sup> C spectrum of <b>12</b> . ....                                                                                                           | 50 |
| <b>Figure S34.</b> DEPT-135 NMR spectrum of <b>12</b> . ....                                                                                                              | 51 |
| <b>Figure S35.</b> <sup>1</sup> H- <sup>13</sup> C HMBC NMR spectrum of <b>12</b> . ....                                                                                  | 51 |
| <b>Figure S36.</b> <sup>1</sup> H- <sup>13</sup> C HSQC NMR spectrum of <b>12</b> . ....                                                                                  | 52 |
| <b>Figure S37.</b> <sup>1</sup> H, <sup>1</sup> H COSY NMR spectrum of <b>12</b> . ....                                                                                   | 52 |
| <b>Figure S38.</b> <sup>1</sup> H NMR spectrum of <b>25</b> . ....                                                                                                        | 53 |
| <b>Figure S39.</b> <sup>13</sup> C NMR spectrum of <b>25</b> . ....                                                                                                       | 53 |
| <b>Figure S40.</b> DEPT-135 NMR spectrum of <b>25</b> . ....                                                                                                              | 54 |
| <b>Figure S41.</b> <sup>1</sup> H- <sup>13</sup> C HMBC NMR spectrum of <b>25</b> . ....                                                                                  | 55 |
| <b>Figure S42.</b> <sup>1</sup> H- <sup>13</sup> C HSQC NMR spectrum of <b>25</b> . ....                                                                                  | 56 |
| <b>Figure S43.</b> <sup>1</sup> H, <sup>1</sup> H COSY NMR spectrum of <b>25</b> . ....                                                                                   | 57 |
| <b>Figure S44.</b> <sup>1</sup> H NMR spectrum of <b>15</b> . ....                                                                                                        | 58 |
| <b>Figure S45.</b> <sup>13</sup> C NMR spectrum of <b>15</b> . ....                                                                                                       | 58 |
| <b>Figure S46.</b> <sup>1</sup> H NMR spectrum of <b>16</b> . ....                                                                                                        | 59 |
| <b>Figure S47.</b> <sup>13</sup> C NMR spectrum of <b>16</b> . ....                                                                                                       | 59 |
| <b>Figure S48.</b> <sup>1</sup> H NMR spectrum of <b>19</b> . ....                                                                                                        | 60 |
| <b>Figure S49.</b> <sup>13</sup> C NMR spectrum of <b>19</b> . ....                                                                                                       | 60 |
| <b>Figure S50.</b> <sup>1</sup> H NMR spectrum of <b>20</b> . ....                                                                                                        | 61 |
| <b>Figure S51.</b> <sup>13</sup> C NMR spectrum of <b>20</b> . ....                                                                                                       | 61 |
| <b>Figure S52.</b> <sup>1</sup> H NMR spectrum of <b>17</b> . ....                                                                                                        | 62 |
| <b>Figure S53.</b> <sup>13</sup> C NMR spectrum of <b>17</b> . ....                                                                                                       | 62 |
| <b>Figure S54.</b> <sup>1</sup> H NMR spectrum of <b>26</b> . ....                                                                                                        | 63 |
| <b>Figure S55.</b> <sup>13</sup> C NMR spectrum of <b>26</b> . ....                                                                                                       | 63 |
| <b>Figure S56.</b> <sup>1</sup> H NMR spectrum of <b>14</b> . ....                                                                                                        | 64 |
| <b>Figure S57.</b> <sup>13</sup> C NMR spectrum of <b>14</b> . ....                                                                                                       | 64 |
| <b>Figure S58.</b> <sup>1</sup> H NMR spectrum of <b>27</b> . ....                                                                                                        | 65 |
| <b>Figure S59.</b> <sup>13</sup> C NMR spectrum of <b>27</b> . ....                                                                                                       | 65 |
| <b>Figure S60.</b> <sup>1</sup> H NMR spectrum of <b>21</b> . ....                                                                                                        | 66 |

## SUPPORTING INFORMATION

|                                                                                                                                                 |    |
|-------------------------------------------------------------------------------------------------------------------------------------------------|----|
| <b>Figure S61.</b> $^{13}\text{C}$ NMR spectrum of <b>21</b> .                                                                                  | 66 |
| <b>Figure S62.</b> $^1\text{H}$ NMR spectrum of synthetic <b>11</b> .                                                                           | 67 |
| <b>Figure S63.</b> $^{13}\text{C}$ NMR spectrum of synthetic <b>11</b> .                                                                        | 67 |
| <b>Figure S64.</b> $^1\text{H}$ NMR spectrum of <b>28</b> .                                                                                     | 68 |
| <b>Figure S65.</b> $^{13}\text{C}$ NMR spectrum of <b>28</b> .                                                                                  | 68 |
| <b>Figure S66.</b> $^1\text{H}$ NMR spectrum of <b>23</b> .                                                                                     | 69 |
| <b>Figure S67.</b> $^{13}\text{C}$ NMR spectrum of <b>23</b> .                                                                                  | 69 |
| <b>Figure S68.</b> $^1\text{H}$ NMR spectrum of <b>29</b> .                                                                                     | 70 |
| <b>Figure S69.</b> $^{13}\text{C}$ NMR spectrum of <b>29</b> .                                                                                  | 70 |
| <b>Figure S70.</b> $^1\text{H}$ NMR spectrum of <b>24</b> after the second preparative HPLC purification.                                       | 71 |
| <b>Figure S71.</b> $^{13}\text{C}$ NMR spectrum of <b>24</b> after the first preparative HPLC purification.                                     | 71 |
| <b>Figure S72.</b> $^1\text{H}$ NMR spectrum of <b>22</b> .                                                                                     | 72 |
| <b>Figure S73.</b> $^{13}\text{C}$ NMR spectrum of <b>22</b> .                                                                                  | 72 |
| <b>Figure S74.</b> ESI-MS (positive mode) of 4-aminobenzoic acid and 4-aminobenzoic-3,5- $\text{d}_2$ acid.                                     | 73 |
| <b>Figure S75.</b> Proposed pathway for biosynthesis of nocarbenzoxazole G by <i>N. lucentensis</i> DSM 44048.                                  | 80 |
| <b>Table S1.</b> Strains used in this study.                                                                                                    | 16 |
| <b>Table S2.</b> Plasmids used in this study.                                                                                                   | 17 |
| <b>Table S3.</b> Primers used in this study.                                                                                                    | 18 |
| <b>Table S4.</b> Sequence of the cassette for CRISPR-Cas9n-based gene knockout.                                                                 | 19 |
| <b>Table S5.</b> NMR shifts of closoxazole A ( <b>11</b> ) isolated from the native producer and its synthetic reference in $\text{DMSO-d}_6$ . | 25 |
| <b>Table S6.</b> Annotated functions of open reading frames of <i>clx</i> and the surrounding genomic region.                                   | 26 |
| <b>Table S7.</b> List of ClxD and NatAM homologs used to construct the sequence similarity network.                                             | 75 |
| <b>Table S8.</b> Proposed functions of ORFs of putative nocarbenzoxazole biosynthetic gene cluster.                                             | 81 |
| <b>Author contributions</b>                                                                                                                     | 82 |
| <b>References</b>                                                                                                                               | 82 |

## Experimental Procedures

### Bacterial strains and culturing conditions

*Escherichia coli* strains were grown at 37 °C in Luria-Bertani medium (10 g BD Bacto™ Tryptone, 5 g BD Bacto™ yeast extract, 10 g NaCl, 1000 mL water; deionized water was used for all media and components described) with agitation or on LB agar plates. The following antibiotics were supplemented as appropriate: 100 µg mL<sup>-1</sup> kanamycin, ampicillin 50 µg mL<sup>-1</sup>, 100 µg mL<sup>-1</sup> ampicillin, 10 µg mL<sup>-1</sup> gentamycin. Plasmid construction and storage was performed with *E. coli* Top10 or XL-1 Blue, while *E. coli* BL21 (DE3) was used for heterologous expression experiments. All generated *E. coli* strains were stored long-term in 10 % (v/v) glycerol (final concentration) at -80 °C. *Clostridium cavendishii* DSM 21758 was obtained from the Leibniz Institute DSMZ-German Collection of Microorganisms and Cell Cultures GmbH and maintained under an anaerobic atmosphere (N<sub>2</sub>:H<sub>2</sub>:CO<sub>2</sub>, 85:5:10 vol:vol:vol) in a Whitley A35 anaerobic work station (Don Whitley Scientific) operating at 37 °C or 30 °C for 68–72 hours. Routine cultivation of the *C. cavendishii* wild-type and Rif1 strains was performed in VM Medium (modified from original recipe<sup>[1]</sup>: 1 g KH<sub>2</sub>PO<sub>4</sub>, 4.5 g K<sub>2</sub>HPO<sub>4</sub> · 3H<sub>2</sub>O, 2.1 g urea, 10 g MOPS, 2 g yeast extract, MgCl<sub>2</sub> · 6H<sub>2</sub>O (5 mM), CaCl<sub>2</sub> · 2H<sub>2</sub>O (1 mM), 1.25 mg mL<sup>-1</sup> FeSO<sub>4</sub> · 7H<sub>2</sub>O, 10 mL vitamin solution, 1 mL trace element solution, 1 g L<sup>-1</sup> cysteine-HCl, 5.1 g cellobiose. Vitamin Solution: 250 mg p-aminobenzoic acid, 250 mg thiamine, 100 mg D-biotin, 150 mg nicotinic acid, 250 mg riboflavin, 100 mg cyanocobalamin, 270 mg calcium pantothenate, 1000 mL water. Trace element solution: 50 mL 10 M HCl, 5 g FeSO<sub>4</sub> (7 · H<sub>2</sub>O), 1.44 g ZnSO<sub>4</sub> (7 · H<sub>2</sub>O), 1.12 g MnSO<sub>4</sub> · 7H<sub>2</sub>O, 30 mg H<sub>3</sub>BO<sub>3</sub>, 20 mg CoCl<sub>2</sub> · 6H<sub>2</sub>O, 40 mg NiCl<sub>2</sub> · 6H<sub>2</sub>O, 20 mg Na<sub>2</sub>SeO<sub>4</sub>, 200 mg Na<sub>2</sub>B<sub>4</sub>O<sub>7</sub> (10 · H<sub>2</sub>O), 1 g (NH<sub>4</sub>)<sub>6</sub>Mo<sub>7</sub>O<sub>24</sub> (4 · H<sub>2</sub>O), 1000 mL water. Transformation procedure was performed in modified GS-2 medium.<sup>[2]</sup> To allow for gas exchange, all cultures were grown in unsealed test-tubes or glass bottles with a loosened lid.

### Experimental procedures with *C. cavendishii* strains

#### Variation of culture conditions

In order to generate metabolite profiles of *C. cavendishii* under various conditions, the strain was cultivated in rich medium (TGY medium: tryptone 5.0 g, yeast extract 3.0 g, D-glucose 1.0 g, 1000 mL water, pH 7.0), minimal medium (P2 medium: 20 g D-glucose, 0.5 g H<sub>2</sub>HPO<sub>4</sub>, 0.5 g KH<sub>2</sub>PO<sub>4</sub>, 2.2g CH<sub>3</sub>COONH<sub>4</sub>, 2.0 g MgSO<sub>4</sub> · 7H<sub>2</sub>O, 0.1 g MnSO<sub>4</sub> · H<sub>2</sub>O, 0.1g NaCl, 0.1 g FeSO<sub>4</sub> · 7H<sub>2</sub>O, 100 mg paraaminobenzoic acid, 100 mg thiamine, 1 mg biotin, 1000 mL water, pH 7.0) and semi-defined medium (VM and CM3<sup>[1, 3]</sup>). Best closoxazole production was obtained when cultivated in VM medium, which was used for all further experiments.

#### General culture extractions for metabolic profiling

For metabolic profiling of *C. cavendishii*, cultures were extracted once with 1:1 (v/v) ethyl acetate, then the extract was dried over Na<sub>2</sub>SO<sub>4</sub> and filtered through filter paper (Rotilabo Typ 600P). Upon concentration under reduced pressure, the extracts were dissolved in methanol (500x concentration) and subjected to analytical LC-MS.

#### Selection of the rifampicin resistant mutant *C. cavendishii* Rif1

In an attempt to enhance closoxazole production by *C. cavendishii*, we took a pleiotropic approach that involves selecting for mutations in genes encoding RNA polymerase (RNAP), a strategy with previous success in upregulating the translation of biosynthetic gene clusters.<sup>[4]</sup> *C. cavendishii* was cultivated overnight in VM broth, then 100 µL volumes were spread on VM agar plates containing 2-fold serial dilutions of rifampicin (concentration range from 4 µg mL<sup>-1</sup> to 0.125 µg mL<sup>-1</sup>), an antibiotic that targets the RNAP β-subunit. The minimum inhibitory concentration (MIC) of rifampicin against *C. cavendishii* under these conditions was 0.5 µg mL<sup>-1</sup>. Based on this result, *C. cavendishii* was again cultivated overnight in VM broth, then 100 µL volumes were spread on VM agar plates containing 2x, 5x, and 10x MIC of rifampicin (1 µg mL<sup>-1</sup>, 2.5 µg mL<sup>-1</sup>, and 5 µg mL<sup>-1</sup>, respectively) to select for spontaneous resistant mutants. Eleven colonies grew at a concentration of 1 µg mL<sup>-1</sup> rifampicin, while none emerged at 2.5 µg mL<sup>-1</sup> and 5 µg mL<sup>-1</sup>. A T-streak of each resistant colony was performed on VM agar containing 1 µg mL<sup>-1</sup> rifampicin, then an isolated colony of each strain was transferred to VM broth containing 1 µg mL<sup>-1</sup> rifampicin for cultivation. The strains were stocked and arbitrarily named Rif1 – Rif11. *C. cavendishii* Rif1 – Rif11 were subjected to metabolic profiling under the established closoxazole production conditions. Compared to the wild type, *C. cavendishii* Rif1 displayed a modest increase in yield. Thus, subsequent scale-up and knock-out experiments used *C. cavendishii* Rif1. The vast majority of mutations induced by rifampicin have been found in the so-called rifampicin resistance-determining region (RRDR) of the *rpoB* gene.<sup>[5]</sup> We therefore performed a colony PCR using primers Ccav\_rpoB\_F and Ccav\_rpoB\_R (Table S3) to amplify the equivalent region of the *C. cavendishii* Rif1 genome, then sequenced the PCR product. The wild-type sequence was maintained in the *C. cavendishii* Rif1 RRDR, meaning that the reason for the increased rifampicin resistance and enhanced closoxazole production is unknown.

#### Plasmid construction for the generation of *C. cavendishii* Rif1 Δ*clxA*

For the creation of the in-frame nonsense mutation of *clxA* in the genome of *C. cavendishii* Rif1, we generated a CRISPR-based knockout plasmid as previously described with minor changes.<sup>[6]</sup> In short, we used the webtool CRISPy-web<sup>[7]</sup> to determine a protospacer flanked by a PAM sequence (5'-NGG-3') suited for CRISPR-nCas9-based genome editing. The PAM site was chosen so that it was present only once in the genome to minimize off-target effects. Gene synthesis (GENEWIZ, Germany) was used to obtain the DNA fragment *clxA-ko* containing the sgRNA under the regulation of the mini-P4 promoter as well as the homologous arms for

homology-directed repair (Table S4). The obtained vector was *Bsal*-digested, the desired fragment extracted using the Monarch Gel Extraction Kit (New England Biolabs) and ligated into *Bsal*-linearized pCasC using T4 Ligase (Thermo Scientific) to result in pCas-clxA-ko (Table S2). For verification, the region of pCas-clxA-ko containing the fragment was sequenced (GENEWIZ, Germany) using primers HB1-seq-rev and pUC-ori-seq-rev (Table S3).

#### Generation of *C. cavendishii* Rif1 $\Delta$ clxA

The single knock-out mutant *C. cavendishii* Rif1 $\Delta$ clxA was generated by a procedure based on the genetic modification of *R. cellulolyticum*.<sup>[6]</sup> *C. cavendishii* Rif1 was transformed with the plasmid pCas-clxA-ko. For this, *C. cavendishii* Rif1 was revived from stock in 5 mL VM medium. Overnight cultures were subcultured once (2.5% v/v inoculum) in 5 mL VM medium. 2.5 mL of the subculture was transferred to 50 mL GS-2 medium and grown until mid-log phase was reached (optical density at 600 nm (OD<sub>600</sub>) of 0.3–0.45). Glycine was added to a final concentration of 10 mg mL<sup>-1</sup> and cells were grown for 1 hour at 37 °C. Cells were harvested at 6000 x g for 10 minutes at 4 °C and washed twice with 15 mL of ice-cold electroporation buffer (270 mM sucrose, 5 mM K<sub>2</sub>HPO<sub>4</sub>, pH 6.5). The pellet was resuspended in 2.5 mL electroporation buffer and 0.5 mL of this suspension added to 1 µg of plasmid DNA. Cells were transferred to an ice cold 0.4 cm electroporation cuvette and incubated for 10 minutes on ice. Cells were electroporated (2000 V, 25 µF, 1000 Ω) and immediately added to 2 mL pre-warmed GS-2 medium. Cells were recovered for 2 hours and then centrifuged at 4000 x g for 10 minutes. Pelleted cells were resuspended in 200 µL GS-2 medium and spread on GS-2 agar plates containing 10 µg mL<sup>-1</sup> erythromycin. Colony-forming units (CFU) that appeared after 1–2 days were transferred to fresh GS-2 plates containing 15 µg mL<sup>-1</sup> erythromycin.

Successful gene editing of the target gene resulted in the introduction of an in-frame STOP codon and, to facilitate screening, an *EcoRV* restriction site (5'-TAAGATATC-3'). The presence or absence of the restriction site (corresponding to edited or unedited *clxA*) was identified by colony PCR using primers ko\_clxA\_fwd and ko\_clxA\_rev and subsequent digest of the PCR fragment with *EcoRV* for 1 hour at 37 °C. PCR amplicons were analysed on a 1% agarose gel stained with ethidium bromide and visualized with UV light. The edited target site would result in two fragments (552 and 460 bp), whereas the unedited target site would result in a product of 1012 bp. Absence of the full-length PCR product and presence of both expected fragments were assigned as fully edited mutants, i.e. *C. cavendishii* Rif1 $\Delta$ clxA. The PCR fragment obtained from the wild-type control remained undigested and the negative control (water instead of template) did not show any band. *C. cavendishii* Rif1 $\Delta$ clxA was cultivated in presence of 20 µg mL<sup>-1</sup> erythromycin to maintain the editing vector when checking for closozazole production.

## General analytical methods

**NMR:** All 1D (<sup>1</sup>H, <sup>13</sup>C, DEPT) and 2D NMR (<sup>1</sup>H-<sup>1</sup>H COSY, HSQC, HMBC) were recorded in deuterated solvents using a Bruker AVANCE II 300, AVANCE III 500 or 600 MHz instrument equipped with Bruker Cryo Platform. The chemical shifts are reported in ppm relative to the solvent residual signal (<sup>1</sup>H: δ (CH<sub>2</sub>Cl<sub>2</sub>) = 5.32 ppm, δ (DMSO) = 2.50 ppm, <sup>13</sup>C: δ (CD<sub>2</sub>Cl<sub>2</sub>) = 53.84 ppm, δ (DMSO-*d*<sub>6</sub>) = 39.52 ppm.<sup>[8]</sup> The following abbreviations are used for multiplicities of resonance signals: s = singlet, d = doublet, t = triplet, q = quartet, qt = quintet, br = broad.

**LC-MS:** LC-MS measurements were performed using Q Exactive Orbitrap High Performance Benchtop LC-MS or Exactive Hybrid-Quadrupole-Orbitrap with electrospray ion source and Accela HPLC system (Thermo Fisher Scientific, Bremen) or Ultimate3000 UHPLC system (Thermo Fisher Scientific, Bremen), or LTQ Velos Ion Trap Benchtop LC-MS with electrospray ion source and Surveyor HPLC system (Thermo Fisher Scientific, Bremen).

**HPLC conditions using Exactive:** A Betasil C18 column; (2.1 × 150 mm, 5 µm, Thermo Fisher) was used with gradient elution as follows: MeCN (0.1% (v/v) HCOOH)/H<sub>2</sub>O (0.1% (v/v) HCOOH). method: initially at 5:95, reaching 2:98 over 6 min then maintaining 2:98 for 3 min. The flow rate was 0.2 mL · min<sup>-1</sup> and injection volume was 3 µL.

**HPLC conditions using Q Exactive:** An Accucore C18 column (2.1 × 100 mm, 2.6 µm, Thermo Fisher) was used with gradient elution as follows: MeCN (0.1% (v/v) HCOOH)/H<sub>2</sub>O (0.1% (v/v) HCOOH) initially at 5:95, reaching 2:98 over 10 min, then maintaining 2:98 for 4 min. The flow rate was 0.2 mL · min<sup>-1</sup> and injection volume was 3 µL.

**UHPLC conditions using Q Exactive:** An Accucore C18 column (2.1 × 100 mm, 2.6 µm, Thermo Fisher) was used with gradient elution as follows: MeCN (0.1% (v/v) HCOOH)/H<sub>2</sub>O (0.1% (v/v) HCOOH) initially at 5:95, reaching 2:98 over 10 min, then maintaining 2:98 for 4 min. The flow rate was 0.2 mL · min<sup>-1</sup> and injection volume was 3 µL.

**UHPLC conditions using Q Exactive:** An Accucore C18 column (2.1 × 100 mm, 2.6 µm, Thermo Fisher) was used with gradient elution as follows: MeCN (0.1% (v/v) HCOOH)/H<sub>2</sub>O (0.1% (v/v) HCOOH) initially at 5:95, reaching 2:98 over 7 min, then maintaining 2:98 for 3 min. The flow rate was 0.2 mL · min<sup>-1</sup> and injection volume was 3 µL.

**HPLC conditions using LTQ:** A C18 column (Phenomenex Kinetex XB-C18, 2.6 µm, 100 × 3 mm) was used with gradient elution as follows: MeCN (0.1% (v/v) HCOOH)/H<sub>2</sub>O (0.1% (v/v) HCOOH) initially at 10:90 for 1 min, reaching 100:0 over 8 min, maintaining 100:0 for 4 min. The flow rate was 0.6 mL · min<sup>-1</sup> and injection volume was 5 µL.

**HPLC:**

**Analytical HPLC:** HPLC measurements were performed on an analytical RP-HPLC system A C18 Waters Symmetry column, 5  $\mu\text{m}$  or EC250/4.6 Neucleodur C18 HTEC 5  $\mu\text{m}$  was used with gradient elution as follows: MeCN/H<sub>2</sub>O (0.1% (v/v) TFA) initially at 20:80 for 5 min, reaching 99:1 over 35 min, maintaining 99:1 for 5 min and a flow rate of 1 mL min<sup>-1</sup> and injection volume was 10  $\mu\text{L}$ .

**Preparative HPLC:** Fractions containing the desired compound were further purified using the preparative HPLC System LC-8A/CBM-20A (Shimadzu) using a C18 column Phenomenex Synergi 4  $\mu\text{m}$  Fusion RP, 80 A; 250 x 21.2 mm with gradient elution as follows:

Closoxazole A and B: MeCN (83% in H<sub>2</sub>O)/H<sub>2</sub>O (0.01% (v/v) TFA) initially at 10:90 for 5 minutes, reaching 100:0 in 40 minutes, then maintaining 100:0 for 10 minutes and a flow rate of 10 mL min<sup>-1</sup>. Tafamidis analogue (**25**): MeCN/H<sub>2</sub>O (0.01% (v/v) TFA) initially at 30:70 for 5 minutes, reaching 100:0 in 35 minutes, then maintaining 100:0 for 10 minutes and a flow rate of 12 mL min<sup>-1</sup>.

For purification of synthetic compounds: using a C18 column Phenomenex Luna 10 u C18(2) 100 A AXIA (250 x 21.2 mm, 10  $\mu\text{m}$ ) with gradient elution as follows: MeCN (100%)/H<sub>2</sub>O (0.01% (v/v) TFA) initially at 25:75 for 4 minutes, reaching 100:0 in 24 minutes, then maintaining 100:0 for 10 minutes and a flow rate of 18 mL min<sup>-1</sup>, or using a C18 column Nucleodur C18 HTEC VP250/10 (250 x 10 mm, 10  $\mu\text{m}$ ) with gradient elution as follows: MeCN (100%)/H<sub>2</sub>O (0.01% (v/v) TFA) initially at 25:75 for 4 minutes, reaching 100:0 in 24 minutes, then maintaining 100:0 for 10 minutes and a flow rate of 5 mL min<sup>-1</sup>.

**Experimental procedures with *E. coli* strains***Plasmid construction for E. coli expression vectors*

The target *clx* genes were amplified by PCR from genomic DNA isolated from *C. cavendishii* Rif1. Primers were designed to contain 15 bp overhang specific for the target vector (Table S3). PCRs were performed with Phusion® High-Fidelity PCR Master Mix and amplicons purified using Monarch Gel Extraction Kit (New England Biolabs). Purified PCR fragments were ligated into linearized vector (Table S2) using NEBuilder according to the manufacturers protocol at 50 °C for 15 min. Ligation reactions were added to electrocompetent *E. coli* Top10 or *E. coli* XL-1 strains and incubated for 15 min on ice, followed by electroporation (2250 V). The cells were recovered for 1–2 h at 37 °C in LB medium with agitation, then spread on LB agar plates supplemented with the appropriate antibiotic. Colony PCR was used to ensure that transformants possessed vectors with inserted PCR fragments. For verification, plasmids were isolated and subjected to restriction analysis to verify insert size.

*Heterologous expression of clx biosynthetic gene cluster*

For heterologous expression of the *clx* genes, *E. coli* BL21 (DE3) were transformed as described above with pET28a and/or pETDuet derived expression vectors. A single colony was used to create a glycerol stock for long-term storage. The relevant strain was revived from stock 2 mL LB (0.5% v/v inoculum) and grown overnight with the appropriate antibiotic. For production and isolation of benzoxazoles, 50 mL of autoinduction medium (6 g Na<sub>2</sub>HPO<sub>4</sub>, 3 g KH<sub>2</sub>PO<sub>4</sub>, 20 g BD Bacto™ Tryptone, 5 g BD Bacto™ yeast extract, 5 g NaCl, 7.56 g glycerol, 0.5 g D-glucose, 2 g lactose, 1000 mL water; optional: 100  $\mu\text{g mL}^{-1}$  kanamycin, 50  $\mu\text{g mL}^{-1}$  ampicillin) was inoculated with 1% v/v of freshly grown overnight culture. Cultures were grown for 12 h at 37 °C with agitation in baffled cultivation flasks. For chemical complementation experiments, synthetic 3,4-AHBA was added to a final concentration of 200  $\mu\text{M}$  to the relevant cultures during the exponential phase (OD<sub>600</sub> ca. 0.5–0.8).

*Supplementation of closoxazole-producing E. coli with varying aromatic acids*

For precursor directed biosynthesis experiments, the respective *E. coli* strains were handled as described above. Chemical supplements were sterile filtered through Rotilabo-syringe filters (CME, pore size 0.22  $\mu\text{m}$ ) and added to a final concentration of 200  $\mu\text{M}$  to *E. coli* in the exponential growth stage (OD<sub>600</sub> ca. 0.5–0.8). When supplementing two precursor substrates, both compounds were added in final concentrations of 200  $\mu\text{M}$  each.

*General culture extractions for metabolic profiling*

For metabolic profiling of *E. coli*, cultures were extracted once with 1:1 (v/v) ethyl acetate, then the extract was dried over Na<sub>2</sub>SO<sub>4</sub> and filtered through filter paper (Rotilabo Typ 600P). Upon concentration under reduced pressure, the extracts were dissolved in methanol (500x concentration) and subjected to analytical LC-MS.

*Large-scale extraction and isolation of closoxazoles*

Closoxazoles were purified from *C. cavendishii* Rif1 culture broth and *E. coli* culture broth. Briefly, *C. cavendishii* Rif 1 was cultured in 500 mL Schott bottles in an anaerobic chamber at 30 °C for 3 days. For extraction with XAD-2 beads, 20 g L<sup>-1</sup> beads were equilibrated with water, then added to the culture broth and incubated aerobically overnight with mixing. The XAD2 beads were separated from culture broth and washed twice with water, followed by extraction in methanol for 1–3 hours. For extraction with ethyl acetate, the culture broth was extracted twice with ethyl acetate, dried under reduced pressure, and dissolved in methanol. After concentration under reduced pressure, the extract was pre-purified using an open size exclusion column (Sephadex L20 resin, MeOH as eluent) or silica column (Kieselgel 60, pore size 20–50  $\mu\text{m}$ , Merck KGaA, elution gradient ethyl acetate:methanol). Fractions were checked for the presence of closoxazole A and B by analytical HPLC. Fractions containing the desired compound were further purified by preparative HPLC.



## SUPPORTING INFORMATION

## Closoxazole A

$^1\text{H NMR}$ : (600 MHz,  $\text{DMSO-d}_6$ , 27 °C):  $\delta$  = 11.91–13.07 (m, 1H), 10.68 (s, 1H), 10.01 (br s, 1H), 9.66 (s, 1H), 8.31 (d,  $J$  = 1.2 Hz, 1H), 8.29 (d,  $J$  = 2.0 Hz, 1H), 7.97 (dd,  $J$  = 8.5, 1.6 Hz, 1H), 7.83 (d,  $J$  = 8.5 Hz, 1H), 7.67 (dd,  $J$  = 8.4, 2.1 Hz, 1H), 7.50 (d,  $J$  = 2.1 Hz, 1H), 7.35 (dd,  $J$  = 8.1, 2.1 Hz, 1H), 6.99 (d,  $J$  = 8.5 Hz, 1H), 6.84 (d,  $J$  = 8.2 Hz, 1H), 4.56–5.36 ppm (m, 2H).

$^{13}\text{C NMR}$  (151 MHz,  $\text{DMSO-d}_6$ , 27 °C):  $\delta$  = 167.1, 165.1, 164.8, 154.1, 152.1, 148.3, 142.0, 137.4, 131.0, 127.7, 126.3, 125.6, 124.6, 121.4, 118.6, 117.1, 117.1, 115.6, 114.5, 112.7, 110.4 ppm.

HRMS (ESI<sup>+</sup>) calcd. for  $\text{C}_{21}\text{H}_{16}\text{N}_3\text{O}_6^+$ : 406.1034; found: 406.1031.

## Closoxazole B

$^1\text{H NMR}$  (600 MHz,  $\text{DMSO-d}_6$ , 27 °C):  $\delta$  = 12.35–12.68 (m, 1H), 10.69 (s, 1H), 9.63–9.67 (m, 1H), 8.32 (d,  $J$  = 2.0 Hz, 1H), 8.28 (d,  $J$  = 1.3 Hz, 1H), 7.94–7.97 (m, 1H), 7.89–7.92 (m, 2H), 7.79–7.82 (m, 1H), 7.66–7.71 (m, 1H), 6.99–7.03 (m, 1H), 6.70–6.74 (m, 2H), 6.08 ppm (br s, 1H).

$^{13}\text{C NMR}$  (151 MHz,  $\text{DMSO-d}_6$ , 27 °C):  $\delta$  = 167.5, 165.6, 165.4, 154.4, 153.4, 152.5, 142.7, 131.4, 129.7, 128.1, 126.7, 126.1, 124.7, 121.9, 118.6, 116.0, 114.0, 112.6, 110.6 ppm.

HRMS (ESI<sup>+</sup>) calcd. for  $\text{C}_{21}\text{H}_{16}\text{N}_3\text{O}_5^+$ : 390.1084; found: 390.1076.

*Extraction and isolation of 25*

Compound **25** was purified from *E. coli* culture broth. Briefly, the culture broth was extracted twice with ethyl acetate, dried under reduced pressure and dissolved in methanol. The obtained extract was pre-purified using an open silica column (Kieselgel 60, pore size 20–50  $\mu\text{m}$ , Merck KGaA, elution gradient ethyl acetate:methanol). Fractions were checked for the presence of the compound by LC-MS. The fraction containing the desired compound **25** was dried under reduced pressure and redissolved in methanol/water/hexane (45:5:50 v/v) for 5 h with occasional shaking. The two layers formed were separated and checked for the presence of the compound by LC-MS and both subjected for further purification by preparative HPLC.

$^1\text{H NMR}$  (600 MHz,  $\text{DMSO-d}_6$ , 27 °C):  $\delta$  = 13.49 (s, 1H), 9.88–9.92 (m, 1H), 8.34 (br d,  $J$  = 1.1 Hz, 1H), 8.18 (dd,  $J$  = 1.9 Hz, 2H), 8.08–8.09 (m, 1H), 8.10 (dd,  $J$  = 8.6, 1.6 Hz, 1H), 7.94–7.95 (m, 1H), 7.96 (br t,  $J$  = 1.9 Hz, 2H), 7.90 ppm (d,  $J$  = 8.6 Hz, 1H).

$^{13}\text{C NMR}$  (151 MHz,  $\text{DMSO-d}_6$ , 27 °C):  $\delta$  = 166.9, 161.0, 152.8, 141.2, 135.2, 131.5, 129.3, 127.7, 125.9, 121.3, 111.1 ppm.

HRMS (ESI<sup>+</sup>) calcd. for  $\text{C}_{14}\text{H}_8\text{Cl}_2\text{NO}_3^+$ : 307.9876; found: 307.9873.

**Synthesis procedures**

All reagents were obtained from commercial suppliers (Sigma Aldrich, TCI, Alfa Aesar, etc.) and used without further purification, unless otherwise explained. Some reactions were performed under inert gas (argon) by using the Schlenk technique and dried solvents. Dichloromethane (DCM), acetonitrile (MeCN), methanol (MeOH) and chloroform were used from a solvent purification system (Innovative Technologies). Open column chromatographic separations were performed on silica gel (Kieselgel 60, 15–40  $\mu\text{m}$ , Merck KGaA). Reaction progresses were monitored by thin layer chromatography (TLC) (silica gel on aluminum sheets 20 x 20 cm with fluorescent indicator 254 nm, Merck KGaA) or HPLC-(HR)MS.

The synthesis of **14** was performed first, then the route was later modified for the synthesis of **11**. It was not possible to simultaneously use Boc and TBS as protecting groups for 3,4-AHBA, probably because of steric hindrance. 3,4-AHBA protected with Boc and acetyl led to an undesirable major product after microwave-assisted benzoxazole formation. Ultimately, Boc and 4-Me-Bn used as protecting groups for 3,4-AHBA enabled microwave-assisted benzoxazole formation, although the harsh reaction conditions led to the partial deprotection of the Boc group. Thus, after the microwave-assisted reaction, benzoxazole **20** was obtained in addition to unreacted starting material (**19**) and Boc-protected **20**.

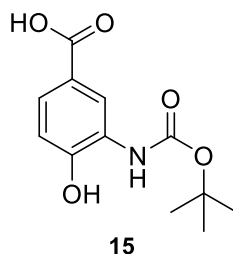**Synthesis of 3-((tert-butoxycarbonyl)amino)-4-hydroxybenzoic acid.**

3-Amino-4-hydroxybenzoic acid (**13**, 851 mg, 5.56 mmol, 1 eq.) was suspended in DMF (7 mL), then  $\text{Boc}_2\text{O}$  (1.27 g, 5.82 mmol, 1.05 eq.) was added. The mixture was stirred at 70 °C for 3 h, cooled to 20 °C and poured into water (30 mL). The white precipitate was filtered, washed with water (2 x 30 mL) and dried under reduced pressure to give the title product (1.12 g, 4.43 mmol, 80%) as a white powder.

## SUPPORTING INFORMATION

$^1\text{H}$  NMR (300 MHz, DMSO- $d_6$ , 21 °C):  $\delta$  = 12.49 (br s, 1H), 10.65 (br s, 1H), 8.27 (d,  $J$  = 1.8 Hz, 1H), 7.90 (s, 1H), 7.51 (dd,  $J$  = 8.5, 2.1 Hz, 1H), 6.88 (d,  $J$  = 8.5 Hz, 1H), 1.46 ppm (s, 9H).

$^{13}\text{C}$  NMR (75 MHz, DMSO- $d_6$ , 22 °C):  $\delta$  = 167.2, 152.7, 151.5, 126.1, 125.6, 122.1, 121.4, 114.5, 79.4, 28.0 ppm.

HRMS (ESI $^+$ ) calcd. for  $\text{C}_{12}\text{H}_{16}\text{NO}_5^+$ : 254.1023; found: 254.1020.

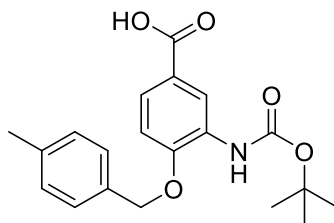

16

### Synthesis of 3-((*tert*-butoxycarbonyl)amino)-4-((4-methylbenzyl)oxy)benzoic acid.

3-Amino-4-hydroxybenzoic acid (**13**, 1.00 g, 6.53 mmol, 1 eq.) was dissolved in DMF (10 mL), then  $\text{Boc}_2\text{O}$  (1.50 g, 6.85 mmol, 1.05 eq.) was added at 0 °C. The mixture was stirred at 70 °C for 3 h, then 4-MeBnBr (3.63 g, 19.59 mmol, 3 eq.) and  $\text{K}_2\text{CO}_3$  (2.71 g, 19.59 mmol, 3 eq.) were added and stirred at 70 °C for 1 h. Water (30 mL) was added under strong stirring and the solution was cooled to 4 °C. A highly viscous layer formed, the water phase was decanted, and the organic phase was washed with water (2 x 30 mL). MeOH (30 mL), water (20 mL) and NaOH (1.28 g, 32 mmol, 4.9 eq.) were added and the mixture was stirred at 70 °C for 4 h until everything was dissolved. Water (30 mL) was added, the solution was cooled to 20 °C and acetic acid (1.87 mL, 1.96 g, 32.64 mmol, 5 eq.) was added slowly under strong stirring. A white precipitate formed and was filtered, washed with water (2 x 30 mL), and dried under reduced pressure to give the title product (1.98 g, 5.54 mmol, 85%) as a white powder.

$^1\text{H}$  NMR (500 MHz, DCM- $d_2$ , 18 °C):  $\delta$  = 8.80 (br s, 1H), 7.78 (dd,  $J$  = 8.6, 2.2 Hz, 1H), 7.35–7.38 (m,  $J$  = 8.0 Hz, 2H), 7.26–7.29 (m,  $J$  = 7.8 Hz, 2H), 7.14 (s, 1H), 7.04 (d,  $J$  = 8.6 Hz, 1H), 5.20 (s, 2H), 2.41 (s, 3H), 1.55 ppm (s, 9H).

$^{13}\text{C}$  NMR (126 MHz, DCM- $d_2$ , 19 °C):  $\delta$  = 170.9, 153.0, 151.5, 139.1, 133.2, 129.9, 129.0, 128.4, 125.7, 122.3, 120.0, 111.4, 81.3, 71.4, 28.5, 21.5 ppm.

HRMS (ESI $^+$ ) calcd. for  $\text{C}_{20}\text{H}_{24}\text{NO}_5^+$ : 358.1649; found: 358.1646.

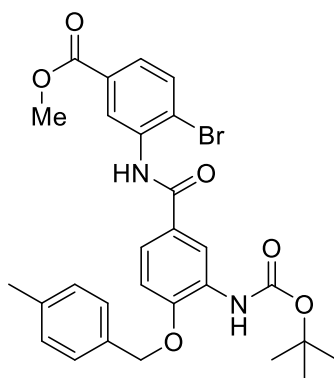

19

### Synthesis of methyl 4-bromo-3-(3-((*tert*-butoxycarbonyl)amino)-4-((4-methylbenzyl)oxy)benzamido)benzoate.

3-((*Tert*-butoxycarbonyl)amino)-4-((4-methylbenzyl)oxy)benzoic acid (**16**, 127.4 mg, 356  $\mu\text{mol}$ , 2.05 eq.) was suspended in DCM (6 mL), then DIPEA (134.8 mg, 181.7  $\mu\text{L}$ , 1.04 mmol, 6eq.) was added to give a clear solution.  $\text{SOCl}_2$  (82.7 mg, 51.7  $\mu\text{L}$ , 695 mmol, 4 eq.) was added and stirred at 20 °C for 10 min. All volatiles were removed under reduced pressure and DCM (6 mL), DIPEA (134.8 mg, 181.7  $\mu\text{L}$ , 1.04 mmol, 6 eq.), a catalytic amount of DMAP (~1 mg) and methyl 3-amino-4-bromobenzoate (**18**, 40 mg, 173  $\mu\text{mol}$ , 1 eq.) were added and stirred overnight at 20 °C. Water (15 mL) was added and the organic phase was washed with NaOH (5 mL, 1 M), HCl (5 mL, 1 M), water (5 mL), dried over  $\text{Na}_2\text{SO}_4$  and the solvent was removed under reduced pressure. The crude product was purified by preparative HPLC to give the title product (44 mg, 77  $\mu\text{mol}$ , 44%) as a white solid.

$^1\text{H}$  NMR (500 MHz, DCM- $d_2$ , 27 °C):  $\delta$  = 9.09 (d,  $J$  = 1.8 Hz, 1H), 8.79 (s, 1H), 8.47 (s, 1H), 7.69–7.75 (m, 1H), 7.74 (s, 1H), 7.62 (dd,  $J$  = 8.5, 2.3 Hz, 1H), 7.36–7.39 (m,  $J$  = 8.0 Hz, 2H), 7.27–7.29 (m,  $J$  = 7.9 Hz, 2H), 7.19 (s, 1H), 7.09 (d,  $J$  = 8.5 Hz, 1H), 5.21 (s, 2H), 3.96 (s, 3H), 2.42 (s, 3H), 1.56 ppm (s, 9H).

$^{13}\text{C}$  NMR (126 MHz, DCM- $d_2$ , 27 °C):  $\delta$  = 166.7, 165.3, 153.1, 150.3, 139.1, 137.0, 133.4, 133.0, 131.2, 130.0, 129.6, 128.4, 127.5, 126.3, 123.1, 122.5, 119.5, 117.1, 112.0, 81.3, 71.5, 52.9, 28.6, 21.5 ppm.

HRMS (ESI $^+$ ) calcd. for  $\text{C}_{28}\text{H}_{30}\text{BrN}_2\text{O}_6^+$ : 569.1282; found: 569.1286.



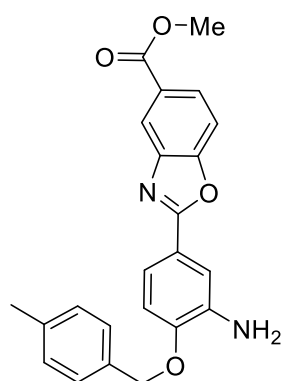

20

### Synthesis of methyl 2-(3-amino-4-((4-methylbenzyl)oxy)phenyl)benzo[d]oxazole-5-carboxylate.

A solution of methyl 4-bromo-3-((*tert*-butoxycarbonyl)amino)-4-((4-methylbenzyl)oxy)benzamido)benzoate (**19**, 20 mg, 35  $\mu$ mol, 1 eq.), CuI (50 mg, 263  $\mu$ mol, 7.5 eq.), Cs<sub>2</sub>CO<sub>3</sub> (100 mg, 307  $\mu$ mol, 8.7 eq.) and 9,10-phenanthroline (50 mg, 280  $\mu$ mol, 8 eq.) in MeCN (10 mL) was prepared. After sonication, the mixture was heated to 210 °C in a microwave (2 min 500 W, then 90 min 150 W) for 1.5 h. The solvent was evaporated under reduced pressure and the crude product was purified by preparative HPLC to give the title product (2.5 mg, 6.4  $\mu$ mol, 18%) as a white solid.

<sup>1</sup>H NMR (500 MHz, DCM-d<sub>2</sub>, 27 °C):  $\delta$  = 8.39 (d, *J* = 1.4 Hz, 1H), 8.08 (dd, *J* = 8.5, 1.6 Hz, 1H), 7.64–7.67 (m, 2H), 7.64–7.67 (m, 1H), 7.63 (d, *J* = 8.5 Hz, 1H), 7.38–7.41 (m, *J* = 7.9 Hz, 2H), 7.25–7.28 (m, *J* = 7.8 Hz, 2H), 7.04 (d, *J* = 9.0 Hz, 1H), 5.18 (s, 2H), 3.97 (s, 3H), 2.41 ppm (s, 4H).

<sup>13</sup>C NMR (126 MHz, DCM-d<sub>2</sub>, 27 °C):  $\delta$  = 166.6, 164.8, 153.7, 149.5, 142.6, 138.2, 137.2, 133.5, 129.3, 127.8, 126.9, 126.3, 121.2, 119.5, 118.5, 113.3, 111.7, 110.1, 70.4, 52.1, 20.9 ppm.

HRMS (ESI<sup>+</sup>) calcd. for C<sub>23</sub>H<sub>21</sub>N<sub>2</sub>O<sub>4</sub><sup>+</sup>: 389.1496; found: 389.1495.

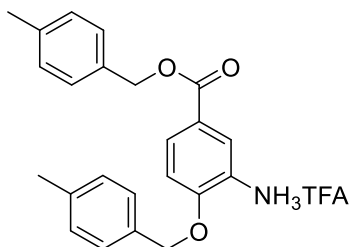

17

### Synthesis of 2-((4-methylbenzyl)oxy)-5-(((4-methylbenzyl)oxy)carbonyl)benzenaminium trifluoroacetate.

3-((*Tert*-butoxycarbonyl)amino)-4-hydroxybenzoic acid (**15**, 523 mg, 2.07 mmol, 1 eq.) was suspended in DMF (5 mL), then 4-MeBnBr (1.15 g, 6.21 mmol, 3 eq.) and K<sub>2</sub>CO<sub>3</sub> (857 mg, 6.20 mmol, 3 eq.) were added. The mixture was heated to 70 °C for 1 h, poured into water (50 mL) and stirred vigorously for 5 min until a highly viscous second layer formed. The water phase was decanted, the viscous liquid was washed with water (50 mL) and dried under reduced pressure. Everything was dissolved in DCM (10 mL), then TFA (1 mL) was added. The mixture was stirred at 40 °C for 12 h, then toluene (20 mL) was added and all solvents were evaporated under reduced pressure. The resulting white solid was suspended in DCM (5 mL), filtered, washed with DCM (2 mL) and dried under reduced pressure to give the TFA salt of the title product (708 mg, 1.49 mmol, 72%) as a white solid.

<sup>1</sup>H NMR (300 MHz, DMSO-d<sub>6</sub>, 21 °C):  $\delta$  = 7.53 (d, *J* = 2.1 Hz, 1H), 7.43 (br d, *J* = 2.1 Hz, 1H), 7.39 (d, *J* = 8.0 Hz, 2H), 7.30–7.36 (m, 2H), 7.20 (d, *J* = 8.2 Hz, 4H), 7.09 (d, *J* = 8.7 Hz, 1H), 5.84 (br s, 3H), 5.24 (s, 2H), 5.19 (s, 2H), 2.31 ppm (s, 6H).

<sup>13</sup>C NMR (75 MHz, DMSO-d<sub>6</sub>, 22 °C):  $\delta$  = 165.8, 151.4, 137.9, 137.7, 133.9, 133.8, 133.2, 129.5, 129.4, 128.6, 128.1, 122.7, 122.6, 117.9, 112.4, 70.1, 66.2, 21.2 ppm.

HRMS (ESI<sup>+</sup>) calcd. for C<sub>23</sub>H<sub>24</sub>NO<sub>3</sub><sup>+</sup>: 362.1751; found: 362.1745.

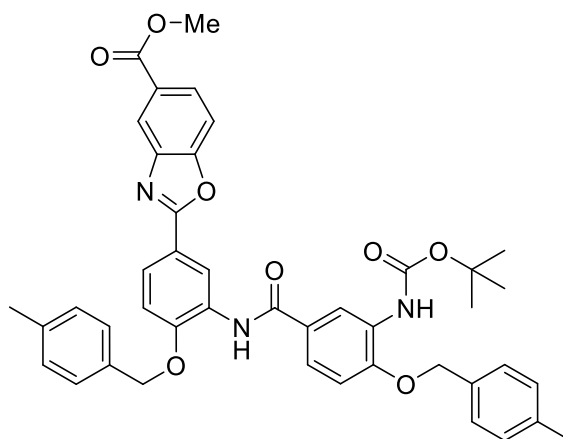

26

### Synthesis of methyl 2-(3-(3-((*tert*-butoxycarbonyl)amino)-4-((4-methylbenzyl)oxy)phenyl)benzo[d]oxazole-5-carboxylate.

Crude *tert*-butyl (5-(chlorocarbonyl)-2-((4-methylbenzyl)oxy)phenyl)carbamate was prepared by mixing 3-((*tert*-butoxycarbonyl)amino)-4-((4-methylbenzyl)oxy)benzoic acid (**16**, 3 mg, 8.4  $\mu$ mol, 1 eq.) with DIPEA (3.25 mg, 4.4  $\mu$ L, 25.2  $\mu$ mol, 3 eq.) and SOCl<sub>2</sub> (2 mg, 1.25  $\mu$ L, 16.8  $\mu$ mol, 2 eq.) in DCM (50  $\mu$ L) for 10 min, followed by removal of all volatile compounds. A solution of methyl 2-(3-amino-4-((4-methylbenzyl)oxy)phenyl)benzo[d]oxazole-5-carboxylate (**20**, 1.67 mg, 4.3  $\mu$ L, 1 eq.), crude *tert*-butyl (5-(chlorocarbonyl)-2-((4-methylbenzyl)oxy)phenyl)carbamate (2 eq.) and DIPEA (1.7 mg, 2.3  $\mu$ L, 12.9  $\mu$ mol, 3 eq.) in DCM (600  $\mu$ L) was prepared and stirred at 20 °C for 20 h. The solvent was removed under reduced pressure and the mixture was purified by preparative HPLC to give the title compound (1.5 mg, 2.1  $\mu$ mol, 48%) as a white solid.

<sup>1</sup>H NMR (600 MHz, DCM-d<sub>2</sub>, 27 °C):  $\delta$  = 9.40 (d, *J* = 2.1 Hz, 1H), 8.75 (br s, 1H), 8.68 (s, 3H), 8.42–8.45 (m, 1H), 8.11 (dd, *J* = 8.5, 1.7 Hz, 2H), 7.99–8.08 (m, 2H), 7.69 (d, *J* = 8.5 Hz, 2H), 7.55 (dd, *J* = 8.5, 2.3 Hz, 2H), 7.45 (d, *J* = 8.0 Hz, 3H), 7.34–7.41 (m, 2H), 7.29 (d, *J* = 7.9 Hz, 2H), 7.26 (d, *J* = 7.9 Hz, 2H), 7.22 (d, *J* = 8.6 Hz, 1H), 7.19 (s, 1H), 7.06 (d, *J* = 8.5 Hz, 2H), 5.32 (s, 3H), 5.21 (s, 2H), 3.98 (s, 4H), 2.42 (s, 3H), 2.39 (s, 3H), 1.57 ppm (s, 9H).

<sup>13</sup>C NMR (151 MHz, DCM-d<sub>2</sub>, 27 °C):  $\delta$  = 166.7, 164.9, 164.4, 153.8, 152.5, 150.2, 149.5, 142.6, 138.5, 138.4, 132.9, 129.4, 129.4, 128.8, 127.8, 127.7, 127.6, 127.0, 126.5, 123.6, 121.8, 121.4, 119.7, 118.7, 116.5, 112.1, 111.3, 110.3, 80.7, 71.1, 70.9, 52.1, 28.0, 20.9 ppm.

HRMS (ESI<sup>+</sup>) calcd. for C<sub>43</sub>H<sub>42</sub>N<sub>3</sub>O<sub>8</sub><sup>+</sup>: 728.2966; found: 728.2972.

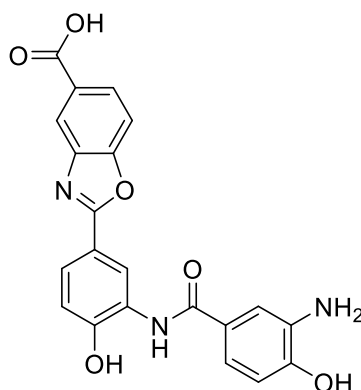

14

### Synthesis of 2-(3-(3-amino-4-hydroxybenzamido)-4-hydroxyphenyl)benzo[d]oxazole-5-carboxylic acid.

Methyl 2-(3-(3-((*tert*-butoxycarbonyl)amino)-4-((4-methylbenzyl)oxy)benzamido)-4-((4-methylbenzyl)oxy)phenyl)benzo[d]oxazole-5-carboxylate (**26**, 1.23 mg, 1.69  $\mu$ mol, 1 eq.) was dissolved in DCM (100  $\mu$ L) and TFA (200  $\mu$ L). The solution was stirred for 3.5 h at 65 °C and the solvents were removed under a stream of nitrogen. The crude product was redissolved in MeOH (50  $\mu$ L) and NaOH (200  $\mu$ L, 1 M), then stirred at 20 °C for 30 min. HCl (200  $\mu$ L, 1 M) was added and the crude product was purified by preparative HPLC to yield the TFA salt of the title product (0.7 mg, 1.35  $\mu$ mol, 80%) as a white solid. Storage under reduced pressure (<1 mbar) over three days gave the free amine.

## SUPPORTING INFORMATION

$^1\text{H}$  NMR (600 MHz, DMSO- $d_6$ , 27 °C):  $\delta$  = 12.72–13.43 (m, 1H), 11.06 (br s, 1H), 10.27–10.27 (m, 1H), 9.93 (br s, 1H), 9.17 (br s, 1H), 8.85 (d,  $J$  = 1.6 Hz, 1H), 8.22–8.33 (m, 1H), 8.02 (dd,  $J$  = 8.5, 1.5 Hz, 1H), 7.90 (dd,  $J$  = 8.4, 2.0 Hz, 1H), 7.88 (d,  $J$  = 8.5 Hz, 1H), 7.34 (br s, 1H), 7.20–7.27 (m, 1H), 7.14 (d,  $J$  = 8.4 Hz, 1H), 6.82 (br d,  $J$  = 8.1 Hz, 1H), 4.76–5.76 ppm (m, 1H).

$^{13}\text{C}$  NMR (151 MHz, DMSO- $d_6$ , 27 °C):  $\delta$  = 167.5, 165.8, 164.5, 153.5, 152.4, 148.8, 142.4, 130.1, 128.1, 127.8, 127.0, 125.7, 125.1, 121.8, 121.0, 118.2, 117.2, 116.5, 115.1, 114.4, 111.2 ppm.

HRMS (ESI $^+$ ) calcd. for  $\text{C}_{21}\text{H}_{16}\text{N}_3\text{O}_6$ : 406.1034; found: 406.1031.

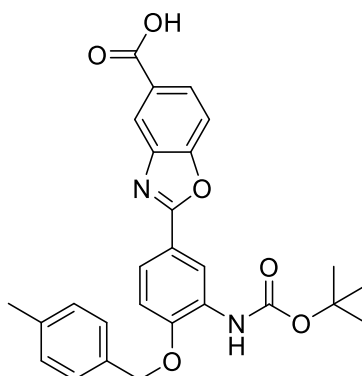

27

#### Synthesis of 2-(3-((*tert*-butoxycarbonyl)amino)-4-((4-methylbenzyl)oxy)phenyl)benzo[*d*]oxazole-5-carboxylic acid.

Methyl 2-(3-amino-4-((4-methylbenzyl)oxy)phenyl)benzo[*d*]oxazole-5-carboxylate (**20**, 2.55 mg, 6.6  $\mu\text{mol}$ , 1 eq.) was dissolved in DMF (500  $\mu\text{L}$ ) and  $\text{Boc}_2\text{O}$  (100 mg, 458  $\mu\text{mol}$ , 70 eq.) was added. The solution was stirred at 70 °C for 8 h, then water (1 mL) was added and stirred at 20 °C overnight. The precipitate was filtered and washed with water (2  $\times$  1.5 mL). The white solid was suspended in MeOH (1.5 mL) and NaOH (200  $\mu\text{L}$ , 1 M) and stirred at 70 °C for 1 h. HCl (100  $\mu\text{L}$ , 2 M) was slowly added and the precipitate was filtered and washed with water (1 mL) and dried under reduced pressure to give the title product (2.3 mg, 4.9  $\mu\text{mol}$ , 74%) as a white solid.

$^1\text{H}$  NMR (600 MHz, DCM- $d_2$ , 27 °C):  $\delta$  = 9.04 (br s, 1H), 8.50 (d,  $J$  = 1.5 Hz, 1H), 8.17 (dd,  $J$  = 8.6, 1.7 Hz, 1H), 7.94 (dd,  $J$  = 8.4, 2.2 Hz, 1H), 7.71 (d,  $J$  = 8.8 Hz, 1H), 7.39 (d,  $J$  = 8.1 Hz, 2H), 7.29 (d,  $J$  = 7.7 Hz, 2H), 7.22 (s, 1H), 7.14 (d,  $J$  = 8.8 Hz, 1H), 5.23 (s, 2H), 2.42 (s, 3H), 1.58 ppm (s, 9H).

$^{13}\text{C}$  NMR (151 MHz, DCM- $d_2$ , 27 °C):  $\delta$  = 168.9, 164.7, 154.3, 152.5, 149.7, 142.7, 138.6, 132.8, 129.4, 129.2, 127.9, 127.1, 125.7, 122.4, 122.1, 119.4, 117.0, 111.7, 110.5, 80.8, 71.0, 28.0, 20.9 ppm.

HRMS (ESI $^+$ ) calcd. for  $\text{C}_{27}\text{H}_{27}\text{N}_2\text{O}_6$ : 475.1864; found: 475.1861.

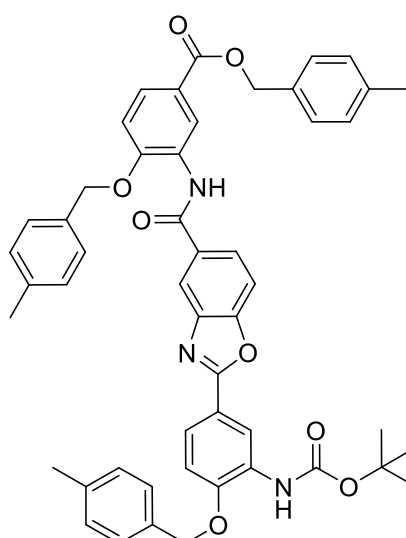

21

#### Synthesis of 4-methylbenzyl 3-(2-(3-((*tert*-butoxycarbonyl)amino)-4-((4-methylbenzyl)oxy)phenyl)benzo[*d*]oxazole-5-carboxamido)-4-((4-methylbenzyl)oxy)benzoate.

A solution of 2-(3-((*tert*-butoxycarbonyl)amino)-4-((4-methylbenzyl)oxy)phenyl)benzo[d]oxazole-5-carboxylic acid (**27**, 2.3 mg, 4.9  $\mu\text{mol}$ , 1 eq.) was dissolved in DCM (1 mL) and DIPEA (1.88 mg, 2.5  $\mu\text{L}$ , 14.5  $\mu\text{mol}$ , 3 eq.), followed by the addition of  $\text{SOCl}_2$  (1.15 mg, 720.8  $\mu\text{L}$ , 9.7  $\mu\text{mol}$ , 2 eq.). The mixture was stirred at 20 °C for 10 min and the volatile solvents were removed under reduced pressure. DCM (1 mL), DIPEA (5.64 mg, 7.5  $\mu\text{L}$ , 43.5  $\mu\text{mol}$ , 9 eq.) and 2-((4-methylbenzyl)oxy)-5-(((4-methylbenzyl)oxy)carbonyl)benzenaminium trifluoroacetate (**17**, 2.9 mg, 6.1  $\mu\text{mol}$ , 1.25 eq.) were added and the mixture was stirred at 20 °C and reaction process was monitored by HPLC-MS. After 1.5 h the solvent was removed under reduced pressure and the crude product was purified by preparative HPLC to give the title product (2.49 mg, 3.1  $\mu\text{mol}$ , 63%) as a white solid.

$^1\text{H}$  NMR (600 MHz,  $\text{DCM-d}_2$ , 27 °C):  $\delta$  = 9.17 (d,  $J$  = 1.8 Hz, 1H), 9.05 (br s, 1H), 8.70 (s, 1H), 8.22 (d,  $J$  = 1.5 Hz, 1H), 7.94 (dd,  $J$  = 8.6, 2.0 Hz, 1H), 7.90 (dd,  $J$  = 8.4, 1.8 Hz, 1H), 7.84 (dd,  $J$  = 8.8, 2.2 Hz, 1H), 7.70 (d,  $J$  = 8.4 Hz, 1H), 7.41 (d,  $J$  = 1.0 Hz, 2H), 7.39 (d,  $J$  = 7.7 Hz, 4H), 7.29 (br d,  $J$  = 7.3 Hz, 2H), 7.28 (br d,  $J$  = 7.7 Hz, 6H), 7.25 (d,  $J$  = 8.1 Hz, 2H), 7.23 (s, 1H), 7.12–7.16 (m, 1H), 7.09 (d,  $J$  = 8.8 Hz, 1H), 5.35 (br s, 2H), 5.28–5.31 (m, 2H), 5.23 (s, 2H), 2.42 (s, 3H), 2.41 (s, 3H), 2.40 (s, 3H), 1.58 ppm (s, 9H).

$^{13}\text{C}$  NMR (151 MHz,  $\text{DCM-d}_2$ , 27 °C):  $\delta$  = 165.9, 164.7, 153.0, 152.5, 151.1, 149.7, 142.8, 138.6, 138.1, 133.4, 132.9, 132.8, 131.7, 129.5, 129.4, 129.2, 128.2, 128.2, 127.9, 127.5, 126.0, 124.2, 123.3, 122.4, 120.8, 119.5, 118.5, 117.0, 111.7, 111.4, 110.7, 80.8, 71.2, 71.0, 66.5, 28.0, 21.0, 20.9 ppm.

HRMS (ESI<sup>+</sup>) calcd. for  $\text{C}_{50}\text{H}_{48}\text{N}_3\text{O}_8$ : 818.3436; found: 818.3438.

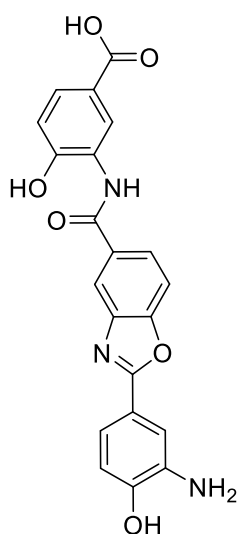

**11**

#### Synthesis of 3-(2-(3-amino-4-hydroxyphenyl)benzo[d]oxazole-5-carboxamido)-4-hydroxybenzoic acid.

A solution of 4-methylbenzyl 3-(2-(3-((*tert*-butoxycarbonyl)amino)-4-((4-methylbenzyl)oxy)phenyl)benzo[d]oxazole-5-carboxamido)-4-((4-methylbenzyl)oxy)benzoate (**21**, 2.0 mg, 2.45  $\mu\text{mol}$ ) in DCM (400  $\mu\text{L}$ ) and TFA (500  $\mu\text{L}$ ) was stirred in a sealed vial at 65 °C for 70 min. The reaction was monitored by HPLC-MS. All volatiles were removed, and the crude product was purified by preparative HPLC and dried under reduced pressure to give the title compound as the TFA salt (1.0 mg, 1.93  $\mu\text{mol}$ , 79%). Storage under reduced pressure (<1 mbar) over three days gave the free amine (0.79 mg, 1.95  $\mu\text{mol}$ , 80%) as a white powder.

$^1\text{H}$  NMR (600 MHz,  $\text{DMSO-d}_6$ , 27 °C):  $\delta$  = 10.73 (br s, 1H), 10.16 (br s, 1H), 9.68 (s, 3H), 8.32 (d,  $J$  = 1.2 Hz, 1H), 8.31 (d,  $J$  = 2.0 Hz, 1H), 7.94–8.04 (m, 1H), 7.84 (d,  $J$  = 8.4 Hz, 1H), 7.69 (dd,  $J$  = 8.4, 2.1 Hz, 1H), 7.53 (d,  $J$  = 2.1 Hz, 1H), 7.39 (dd,  $J$  = 8.2, 2.1 Hz, 1H), 6.97–7.06 (m, 1H), 6.86 ppm (d,  $J$  = 8.2 Hz, 1H).

$^{13}\text{C}$  NMR (151 MHz,  $\text{DMSO-d}_6$ , 27 °C):  $\delta$  = 167.2, 165.2, 164.9, 154.2, 152.2, 148.5, 142.0, 137.0, 131.1, 127.9, 126.4, 125.6, 124.7, 121.5, 118.6, 117.5, 117.1, 115.6, 114.6, 113.1, 110.5 ppm.

HRMS (ESI<sup>+</sup>) calcd. for  $\text{C}_{21}\text{H}_{16}\text{N}_3\text{O}_6$ : 406.1034; found: 406.1033.

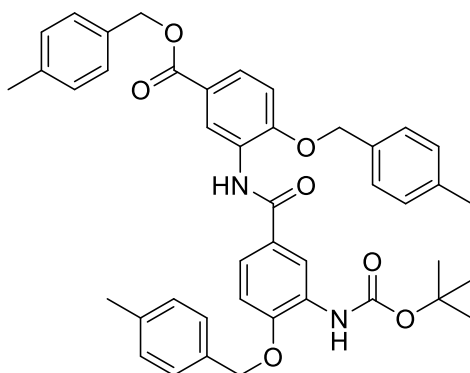

28

### Synthesis of 4-methylbenzyl 3-(3-((*tert*-butoxycarbonyl)amino)-4-((4-methylbenzyl)oxy)benzamido)-4-((4-methylbenzyl)oxy)benzoate.

3-((*Tert*-butoxycarbonyl)amino)-4-((4-methylbenzyl)oxy)benzoic acid (**16**, 100 mg, 0.28 mmol, 1 eq.) was suspended in DCM (5 mL), then DIPEA (108.5 mg, 146.2  $\mu$ L, 0.84 mmol, 3 eq.) was added to give a clear solution.  $\text{SOCl}_2$  (66.6 mg, 39.6  $\mu$ L, 0.56 mmol, 2 eq.) was added and stirred at 20 °C for 10 min. All volatiles were removed under reduced pressure, then DCM (5 mL), DIPEA (108.5 mg, 146.2  $\mu$ L, 0.84 mmol, 3 eq.) and 2-((4-methylbenzyl)oxy)-5-(((4-methylbenzyl)oxy)carbonyl)benzenaminium trifluoroacetate (**17**, 133.6 mg, 0.28 mmol, 1 eq.) were added and stirred 1 h at 20 °C. The solvent was removed under reduced pressure and the crude mixture was purified by preparative HPLC to give the title product (148.2 mg, 0.21 mmol, 76%).

$^1\text{H}$  NMR (500 MHz,  $\text{DCM-d}_2$ , 27 °C):  $\delta$  = 9.16 (d,  $J$  = 2.1 Hz, 1H), 8.75 (s, 1H), 8.61 (s, 1H), 7.85 (dd,  $J$  = 8.6, 2.2 Hz, 1H), 7.53 (dd,  $J$  = 8.5, 2.3 Hz, 1H), 7.44 (d,  $J$  = 4.1 Hz, 2H), 7.42 (d,  $J$  = 4.1 Hz, 2H), 7.39 (d,  $J$  = 8.0 Hz, 2H), 7.29 (d,  $J$  = 7.9 Hz, 2H), 7.27 (d,  $J$  = 4.4 Hz, 2H), 7.26 (d,  $J$  = 4.4 Hz, 2H), 7.22 (s, 1H), 7.10 (d,  $J$  = 8.6 Hz, 1H), 7.04 (d,  $J$  = 8.6 Hz, 1H), 5.37 (s, 2H), 5.27 (s, 2H), 5.19 (s, 2H), 2.43 (s, 4H), 2.42 (s, 3H), 2.40 (s, 3H), 1.59 ppm (s, 9H).

$^{13}\text{C}$  NMR (126 MHz,  $\text{DCM-d}_2$ , 27 °C):  $\delta$  = 166.0, 164.8, 152.5, 151.1, 149.5, 138.5, 138.3, 138.0, 133.5, 132.9, 129.4, 129.2, 128.8, 128.3, 128.2, 127.9, 127.7, 127.6, 125.8, 123.3, 121.8, 120.9, 116.6, 111.3, 80.7, 71.0, 70.9, 66.4, 28.1, 21.0 ppm.

HRMS (ESI<sup>+</sup>) calcd. for  $\text{C}_{43}\text{H}_{45}\text{N}_2\text{O}_7^+$ : 701.3221; found: 701.3220.

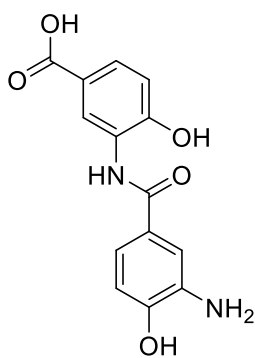

23

### Synthesis of 3-(3-amino-4-hydroxybenzamido)-4-hydroxybenzoic acid.

A solution of 4-methylbenzyl 3-(3-((*tert*-butoxycarbonyl)amino)-4-((4-methylbenzyl)oxy)benzamido)-4-((4-methylbenzyl)oxy)benzoate (**28**, 50 mg, 0.07 mmol, 1 eq.) in DCM (2 mL) was prepared, then TFA (2 mL) was added and the solution was stirred in a vial at 65 °C for 60 min. The solvent was removed under reduced pressure and the crude mixture was purified by preparative HPLC to give the title product as the TFA salt (24.5 mg, 0.06 mmol, 86%). Storage under reduced pressure (<1 mbar) over three days gave the free amine.

$^1\text{H}$  NMR (500 MHz,  $\text{DMSO-d}_6$ , 27 °C):  $\delta$  = 12.52 (br s, 1H), 10.77 (br s, 1H), 9.26 (s, 1H), 8.40 (d,  $J$  = 2.1 Hz, 1H), 7.64 (dd,  $J$  = 8.4, 2.1 Hz, 1H), 7.60 (br s, 1H), 7.52–7.57 (m, 1H), 6.98 (d,  $J$  = 8.4 Hz, 1H), 6.95 (dd,  $J$  = 8.3, 1.4 Hz, 1H), 3.81 ppm (br s, 2H).

$^{13}\text{C}$  NMR (126 MHz,  $\text{DMSO-d}_6$ , 27 °C):  $\delta$  = 167.5, 165.1, 153.4, 151.4, 127.5, 127.3, 126.4, 125.8, 125.2, 123.4, 121.9, 119.5, 115.7, 115.2 ppm.

HRMS (ESI<sup>+</sup>) calcd. for  $\text{C}_{14}\text{H}_{13}\text{N}_2\text{O}_5^+$ : 289.0819; found: 289.0817.

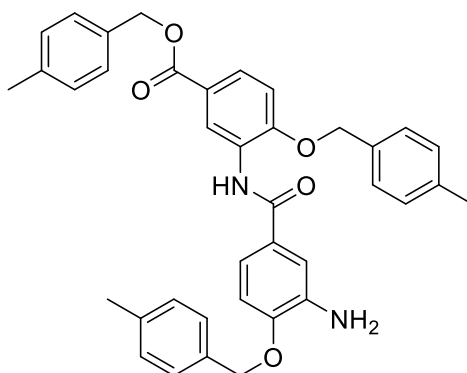

29

### Synthesis of 4-methylbenzyl 3-(3-amino-4-((4-methylbenzyl)oxy)benzamido)-4-((4-methylbenzyl)oxy)benzoate.

A solution of 4-methylbenzyl 3-(3-((*tert*-butoxycarbonyl)amino)-4-((4-methylbenzyl)oxy)benzamido)-4-((4-methylbenzyl)oxy)benzoate (**28**, 50 mg, 0.071 mmol) in DCM (2 mL) was prepared, then TFA (100  $\mu$ L) was added and the solution was stirred at room temperature and reaction progress was monitored by HPLC-MS. After 4 h the solvent was evaporated and the crude mixture was purified by preparative HPLC to give the title product as the TFA salt (45.4 mg, 0.064 mmol, 89%). Storage under reduced pressure (<1 mbar) over three days gave the free amine.

$^1\text{H}$  NMR (600 MHz, DMSO- $d_6$ , 27  $^\circ\text{C}$ ):  $\delta$  = 9.18 (s, 1H), 8.47 (d,  $J$  = 2.2 Hz, 1H), 7.77 (dd,  $J$  = 8.7, 2.2 Hz, 1H), 7.39–7.41 (m, 2H), 7.39 (d,  $J$  = 4.3 Hz, 2H), 7.35 (d,  $J$  = 8.0 Hz, 2H), 7.27 (d,  $J$  = 2.2 Hz, 1H), 7.24 (d,  $J$  = 8.8 Hz, 1H), 7.21 (d,  $J$  = 7.4 Hz, 4H), 7.18 (d,  $J$  = 7.8 Hz, 2H), 7.13 (dd,  $J$  = 8.3, 2.1 Hz, 1H), 6.96 (d,  $J$  = 8.4 Hz, 1H), 5.28 (s, 2H), 5.26 (s, 2H), 5.16 (s, 2H), 5.11 (br s, 1H), 2.31 (s, 7H), 2.30 ppm (s, 3H).

$^{13}\text{C}$  NMR (151 MHz, DMSO- $d_6$ , 27  $^\circ\text{C}$ ):  $\delta$  = 165.7, 165.6, 154.2, 148.6, 138.1, 137.9, 137.7, 137.5, 134.4, 133.8, 133.8, 129.5, 129.5, 129.4, 128.6, 128.2, 128.1, 127.9, 127.4, 127.3, 124.5, 122.2, 116.3, 113.8, 113.1, 111.8, 70.5, 69.8, 66.4, 21.3 ppm.

HRMS (ESI $^+$ ) calcd. for  $\text{C}_{38}\text{H}_{37}\text{N}_2\text{O}_5^+$ : 601.2697; found: 601.2696.

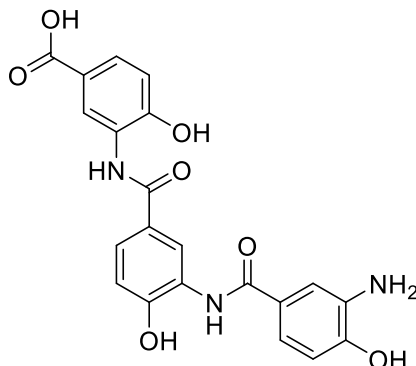

24

### Synthesis of 3-(3-(3-amino-4-hydroxybenzamido)-4-hydroxybenzamido)-4-hydroxybenzoic acid.

3-((*Tert*-butoxycarbonyl)amino)-4-((4-methylbenzyl)oxy)benzoic acid (**16**, 8.92 mg, 0.025 mmol, 1.5 eq.) was suspended in DCM (100  $\mu$ L), then DIPEA (6.45 mg, 8.7  $\mu$ L, 0.05 mmol, 3 eq.) was added to give a clear solution.  $\text{SOCl}_2$  (3.96 mg, 2.4  $\mu$ L, 0.033 mmol, 2 eq.) was added and stirred at 20  $^\circ\text{C}$  for 10 min. All volatiles were removed under reduced pressure and DCM (100  $\mu$ L), DIPEA (6.45 mg, 8.7  $\mu$ L, 0.05 mmol, 3 eq.) and 4-methylbenzyl 3-(3-amino-4-((4-methylbenzyl)oxy)benzamido)-4-((4-methylbenzyl)oxy)benzoate (**29**, 10 mg, 0.016 mmol, 1 eq.) were added. The mixture was stirred at 20  $^\circ\text{C}$  for 1 h and the reaction progress was monitored by HPLC-MS. All volatiles were removed under reduced pressure. The crude 4-methylbenzyl 3-(3-((*tert*-butoxycarbonyl)amino)-4-((4-methylbenzyl)oxy)benzamido)-4-((4-methylbenzyl)oxy)benzamido)-4-((4-methylbenzyl)oxy)benzoate was dissolved in DCM (100  $\mu$ L) and TFA (100  $\mu$ L), then heated to 60  $^\circ\text{C}$  in a sealed vial. The reaction was monitored by HPLC-MS and stopped after 165 min. The crude mixture was purified by preparative HPLC to give the title product as the TFA salt (~5 mg,  $^{13}\text{C}$ -NMR is shown). Small impurities were detected by HPLC-HRMS and the product was purified a second time by preparative HPLC to give the title product as a white solid (0.6 mg, 0.001 mmol, 9%).  $^1\text{H}$ -NMR and HPLC-HRMS showed no more impurities, but due to the small amount not all signals could be found in  $^{13}\text{C}$ -NMR, therefore the  $^{13}\text{C}$ -NMR after the first preparative purification is shown.

$^1\text{H}$  NMR (600 MHz, DMSO- $d_6$ , 27  $^\circ\text{C}$ ):  $\delta$  = 12.56 (br s, 1H), 10.76 (s, 1H), 10.67 (s, 1H), 10.15–10.47 (br s, 1H), 9.33 (s, 1H), 9.30 (s, 1H), 8.42 (d,  $J$  = 2.3 Hz, 1H), 8.40 (d,  $J$  = 2.1 Hz, 1H), 7.70 (dd,  $J$  = 8.5, 2.3 Hz, 1H), 7.65 (dd,  $J$  = 8.4, 2.2 Hz, 1H), 7.45 (br s, 1H), 7.33–7.42 (br s, 1H), 7.03 (d,  $J$  = 8.4 Hz, 1H), 6.99 (d,  $J$  = 8.4 Hz, 1H), 6.85–6.88 (br d,  $J$  = 8.4 Hz, 1H), 6.54 ppm (br s, 3H).  $^{13}\text{C}$



## SUPPORTING INFORMATION

NMR (126 MHz, DMSO- $d_6$ , 27 °C):  $\delta$  = 167.6, 165.3, 165.3, 153.5, 152.9, 151.8, 127.5, 127.4, 126.6, 126.5, 125.6, 125.4, 125.1, 123.7, 123.6, 122.2, 121.9, 119.8, 115.8, 115.8, 115.4 ppm. HRMS (ESI<sup>+</sup>) calcd. for C<sub>21</sub>H<sub>18</sub>N<sub>3</sub>O<sub>7</sub><sup>+</sup>: 424.1139; found: 424.1136.

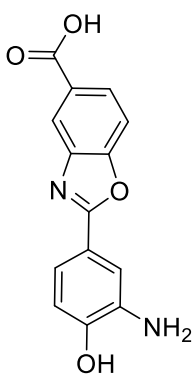**22**

#### Synthesis of 2-(3-amino-4-hydroxyphenyl)benzo[d]oxazole-5-carboxylic acid.

A solution of 3-((*tert*-butoxycarbonyl)amino)-4-((4-methylbenzyl)oxy)benzoic acid (**16**, 176 mg, 0.49 mmol, 1 eq.) was suspended in DCM (2 mL) and DIPEA (191 mg, 257  $\mu$ L, 1.48 mmol, 3 eq.) was added. Then SOCl<sub>2</sub> (88 mg, 0.74 mmol, 54  $\mu$ L, 1.5 eq.) was added and the mixture was stirred at room temperature for 10 min. Then all volatile compounds were removed under reduced pressure. The solid residue was redissolved in DCM (2 mL) and DIPEA (191 mg, 257  $\mu$ L, 1.48 mmol, 3 eq.) and 3-((*tert*-butoxycarbonyl)amino)-4-hydroxybenzoic acid (**15**, 100 mg, 0.39 mmol, 0.8 eq.) were added. The mixture was stirred at room temperature for 6 h and all volatile compounds were removed under reduced pressure. The solid residue was redissolved in DCM (2 mL) and TFA (2 mL) was added and the mixture was refluxed at 65 °C for 21 h. The solvents were removed under a stream of nitrogen and the crude mixture was purified by preparative HPLC to give the title product (19.1 mg, 0.071 mmol, 14%).

<sup>1</sup>H NMR (600 MHz, DMSO- $d_6$ , 26 °C):  $\delta$  = 12.12–13.86 (m, 1H), 10.55–10.92 (m, 1H), 8.24 (d,  $J$  = 1.1 Hz, 1H), 8.00 (dd,  $J$  = 8.5, 1.4 Hz, 1H), 7.82 (d,  $J$  = 8.5 Hz, 1H), 7.76 (br s, 1H), 7.61–7.67 (m, 1H), 6.99 ppm (br d,  $J$  = 8.3 Hz, 1H).

<sup>13</sup>C NMR (151 MHz, DMSO- $d_6$ , 29 °C):  $\delta$  = 167.5, 164.6, 153.4, 151.1, 142.4, 131.5, 128.1, 126.9, 122.0, 120.9, 117.5, 117.3, 115.9, 111.1 ppm.

HRMS (ESI<sup>+</sup>) calcd. for C<sub>14</sub>H<sub>11</sub>N<sub>2</sub>O<sub>4</sub><sup>+</sup>: 271.0713; found: 271.0709.

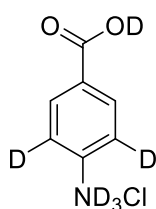**30**

#### 4-(Carboxy-*d*)benzen-2,6-*d*<sub>2</sub>-aminium-*d*<sub>3</sub>

4-Aminobenzoic acid (250 mg, 1.82 mmol) was suspended in D<sub>2</sub>O (7 mL) and DCl in D<sub>2</sub>O (3 mL, 38%). The solution was degassed with argon, sealed in a microwave vial, and was heated to 110 °C in a microwave for 15 h. The mixture was cooled to room temperature and the solvent was removed under reduced pressure to yield the title product as a grey powder (303.7 mg, 1.69 mmol, 93%).

HRMS (ESI<sup>+</sup>) calcd. for C<sub>7</sub>H<sub>6</sub>D<sub>2</sub>NO<sub>2</sub><sup>+</sup>: 140.0675; found: 140.0674.

**Bioinformatic analysis***Identification of closoxazole biosynthetic gene cluster and sequence alignments*

Searches for genes encoding canonical benzoxazole biosynthetic enzymes in the *C. cavendishii* genome were done using BLAST.<sup>[9]</sup> To identify the candidate cluster *clx*, the putative functions of enzymes encoded in the *clx* locus were assigned based on BLAST and HHPred searches.<sup>[9-10]</sup> Sequence alignments were created using ClustalOmega.<sup>[11]</sup>

*Genome Neighborhood Diagram*

In order to provide support for our proposal that *clxA–E* (GenBank locus tags: BUB01\_RS09140 – BUB01\_RS09155) are the minimal set of genes required for closoxazole formation, we created Genome Neighborhood Diagrams using the Enzyme Function Initiative - Genome Neighborhood Network Tool (EFI-GNT) provided by the Enzyme Function Initiative Enzyme Similarity Tool (EFI-EST; <https://efi.igb.illinois.edu/efi-gnt/>).<sup>[12]</sup> For this, the corresponding amino acid sequences were obtained from UniProt and submitted to EFI-GNT using the default parameters. The local genomic region of the *clx* locus, consisting of 10 open reading frames upstream and downstream, was manually checked for genes putatively encoding enzymes associated with secondary metabolism.

*Sequence Similarity Network*

ClxD (NCBI accession: SHJ39914.1) and NatAM (NCBI accession: CEK42821) were used to generate the sequence similarity network (SSN) using EFI-EST (<https://efi.igb.illinois.edu/efi-est/>).<sup>[12]</sup> The primary networks were created at an expectation-value (e-value) of  $10^{-50}$  for the SSN based on ClxD and  $10^{-120}$  for that based on NatAM, the secondary and final network at e-value of  $10^{-60}$ . The alignment score was determined empirically. The primary and secondary SSNs were analysed using the representative node network where proteins with  $\geq 90\%$  sequence identity were collapsed to a single node. The final network visualized sequences with 100% identity as a single node and consisted of 243 nodes. All networks were visualized using Cytoscape (v. 3.8.0) with the organic layout.<sup>[13]</sup> The accession numbers of the included sequences can be found in **Table S7**. Associated Genome Neighborhood Diagrams were generated using the default parameters and analyzed manually to search the local genomic regions adjacent to the genes encoding the NatAM and ClxD homologs.

## SUPPORTING INFORMATION

**Table S1.** Strains used in this study.

| Strain                                      | Purpose, genotype                                                                      | Abbreviated name             | Reference         |
|---------------------------------------------|----------------------------------------------------------------------------------------|------------------------------|-------------------|
| <i>Clostridium cavendishii</i>              | wild type (DSM 21758)                                                                  | -                            |                   |
| <i>C. cavendishii</i> Rif1                  | DSM 21758-derived, rifampicin-resistant strain                                         | -                            | this study        |
| <i>C. cavendishii</i> Rif1                  | negative control for gene inactivation, Ery <sup>R</sup>                               | -                            | this study        |
| <i>C. cavendishii</i> Rif1 $\Delta$ clxA    | <i>C. cavendishii</i> Rif1 with CRISPR/Cas9-inactivated <i>clxA</i> , Ery <sup>R</sup> | -                            | this study        |
| <i>Escherichia coli</i> TOP10               | general cloning strain                                                                 | -                            | laboratory strain |
| <i>E. coli</i> XL1-Blue                     | general cloning strain                                                                 | -                            | laboratory strain |
| <i>E. coli</i> BL21 (DE3)                   | heterologous expression strain                                                         | -                            | laboratory strain |
| <i>E. coli</i> pET-28a (+) <sup>[a,c]</sup> | <i>E. coli</i> BL21 (DE3) containing pET-28a                                           | -                            | this study        |
| <i>E. coli</i> pETDuet-1 <sup>[b,c]</sup>   | <i>E. coli</i> BL21 (DE3) containing pETDuet-1                                         | -                            | this study        |
| <i>E. coli</i> pET-28a- pET-Duet1           | <i>E. coli</i> BL21 (DE3) containing pET28 and pETDuet                                 | -                            | this study        |
| <i>E. coli</i> pET28a-clxABCDE              | <i>E. coli</i> BL21 (DE3) containing pET28a-clxABCDE                                   | <i>E. coli</i> pET28a-clxA-E | this study        |
| <i>E. coli</i> pET28-clxBCDE                | <i>E. coli</i> BL21 (DE3) containing pET28-clxBCDE                                     | <i>E. coli</i> pET-clxBCDE   | this study        |
| <i>E. coli</i> pETDuet-clxB                 | <i>E. coli</i> BL21 (DE3) containing pETDuet-clxB                                      | <i>E. coli</i> pET-clxB      | this study        |
| <i>E. coli</i> pETDuet-clxE                 | <i>E. coli</i> BL21 (DE3) containing pETDuet-clxE                                      | <i>E. coli</i> pET-clxE      | this study        |
| <i>E. coli</i> pETDuet-clxBE                | <i>E. coli</i> BL21 (DE3) containing pETDuet-clxBE                                     | <i>E. coli</i> pET-clxBE     | this study        |
| <i>E. coli</i> pET28-clxACD                 | <i>E. coli</i> BL21 (DE3) containing pET28-clxACD                                      | <i>E. coli</i> pET-clxACD    | this study        |
| <i>E. coli</i> pET28-clxAD pETDuet-clxBE    | <i>E. coli</i> BL21 (DE3) containing pET28-clxAD and pETDuet-clxBE                     | <i>E. coli</i> pET-clxABDE   | this study        |
| <i>E. coli</i> pET28-clxAC- pETDuet-clxBE   | <i>E. coli</i> BL21 (DE3) containing pET28-clxAC and pETDuet-clxBE                     | <i>E. coli</i> pET-clxABCE   | this study        |
| <i>E. coli</i> pET28-clxA- pETDuet-clxBE    | <i>E. coli</i> BL21 (DE3) containing pET28-clxA and pETDuet-clxBE                      | <i>E. coli</i> pET-clxABE    | this study        |
| <i>E. coli</i> pET28clxC- pETDuet-clxBE     | <i>E. coli</i> BL21 (DE3) containing pET28-clxC and pETDuet-clxBE                      | <i>E. coli</i> pET-clxCBE    | this study        |
| <i>E. coli</i> pET28-clxAD                  | <i>E. coli</i> BL21 (DE3) containing pET28-clxAD                                       | <i>E. coli</i> pET-clxAD     | this study        |
| <i>E. coli</i> pET28-clxD                   | <i>E. coli</i> BL21 (DE3) containing pET28-clxD                                        | <i>E. coli</i> pET-clxD      | this study        |
| <i>E. coli</i> pET28-clxA                   | <i>E. coli</i> BL21 (DE3) containing pET28-clxA                                        | <i>E. coli</i> pET-clxA      | this study        |
| <i>E. coli</i> pET28-clxC                   | <i>E. coli</i> BL21 (DE3) containing pET28-clxC                                        | <i>E. coli</i> pET-clxC      | this study        |

a: from here on called pET28, b: from here on called pETDuet; c: for simplification of the naming of the two-plasmid system, all *E. coli* strains used for heterologous expression studies are referred to as *E. coli* pET, regardless if they carry a pET28a- or pETDuet-derived expression vectors or both.

## SUPPORTING INFORMATION

Table S2. Plasmids used in this study.

| Name          | Description                                                                                                        | Reference     |
|---------------|--------------------------------------------------------------------------------------------------------------------|---------------|
| pCasC         | pSOS-Cas-GmR with D10A Cas9 mutation; Clostridia-adapted vector for CRISPR/Cas editing in <i>R. cellulolyticum</i> | [6]           |
| pCas-clxA-ko  | 1-step CRISPR/nCas9 knockout vector for <i>ccav_clxA</i>                                                           | this study    |
| pET28a        | heterologous expression of synthetic genes, KanR, IPTG/Lactose inducible                                           | Sigma-Aldrich |
| pETDuet-1     | heterologous expression of synthetic genes, AmpR, IPTG/Lactose inducible                                           | Sigma-Aldrich |
| pET28a-clxA-E | <i>clxABCDE</i> downstream of T7 polymerase promotor and RBS in pET28 ( <i>NcoI/NheI</i> )                         | this study    |
| pET28-clxBCDE | <i>clxBCDE</i> downstream of T7 polymerase promotor and RBS in pET28 ( <i>NcoI/NheI</i> )                          | this study    |
| pETDuet-clxB  | <i>clxB</i> downstream of T7 polymerase promotor and RBS in pETDuet ( <i>NdeI/PacI</i> )                           | this study    |
| pETDuet-clxE  | <i>clxE</i> downstream of T7 polymerase promotor and RBS in pETDuet ( <i>NcoI/BamHI</i> )                          | this study    |
| pETDuet-clxBE | <i>clxB</i> downstream of T7 polymerase promotor and RBS in pETDuet-clxE ( <i>NdeI/PacI</i> )                      | this study    |
| pET28-clxA    | <i>clxA</i> downstream of T7 polymerase promotor and RBS in pET28 ( <i>NcoI/NdeI</i> )                             | this study    |
| pET28-clxAC   | <i>clxC</i> downstream of T7 polymerase promotor and RBS in pET28-clxA ( <i>NheI/BamHI</i> )                       | this study    |
| pET28-clxACD  | <i>clxCD</i> downstream of T7 polymerase promotor and RBS in pET28-clxA ( <i>NheI/BamHI</i> )                      | this study    |
| pET28-clxAD   | <i>clxD</i> downstream of T7 polymerase promotor and RBS in pET28-clxA ( <i>NheI/BamHI</i> )                       | this study    |
| pET28-clxD    | <i>clxD</i> downstream of T7 polymerase promotor and RBS in pET28 ( <i>NcoI/NheI</i> )                             | this study    |
| pET28-clxC    | <i>clxC</i> downstream of T7 polymerase promotor and RBS in pET28 ( <i>NcoI/NdeI</i> )                             | this study    |

AmpR – ampicillin resistance, GmR – gentamicin resistance, EryR – erythromycin resistance, KanR – kanamycin resistance, RBS – ribosome binding site

## SUPPORTING INFORMATION

Table S3. Primers used in this study.

| Name                        | Sequence (5' – 3')                                    | Purpose                                                                              |
|-----------------------------|-------------------------------------------------------|--------------------------------------------------------------------------------------|
| ccav_rpoB_F                 | GGATATGTAGATGATATAGATCACTTAGG                         | forward primer for sequencing of RRDR of <i>rpoB</i> from <i>C. cavendishii</i> Rif1 |
| ccav_rpoB_R                 | CTTCTTCTTGCTCTTACTGTAAC                               | reverse primer for sequencing of RRDR of <i>rpoB</i> from <i>C. cavendishii</i> Rif1 |
| ko_clxA_fwd                 | CTTATAGAAATTAACCAATTGCTAAACC                          | colony-PCR $\Delta$ <i>clxA</i>                                                      |
| ko_clxA_rev                 | CAGCATCATCTTGAGCTTTGAC                                | colony-PCR $\Delta$ <i>clxA</i>                                                      |
| HB1-seq-rev                 | AACAAGCCATGAAAACCG                                    | forward sequencing pCas- <i>clxA</i> -ko                                             |
| pUC-ori-seq-rev             | CTACGGGGTCTGACGCTCAG                                  | reverse sequencing pCas- <i>clxA</i> -ko                                             |
| pET28a- <i>clxABCDE</i> fwd | TTTAACTTTAAGAAGGAGATATACCATGTATAAAATACTAAAGATGA       | cloning of pET28a- <i>clxABCDE</i>                                                   |
| pET28a- <i>clxABCDE</i> rev | TTTGCTGTCCACCAGTCATGCTAGCTTATACAACGAAAACCTTGT         | cloning of pET28a- <i>clxABCDE</i>                                                   |
| pET28a- <i>clxBCDE</i> fwd  | TTTAACTTTAAGAAGGAGATATACCATGATTAACAAAAAGATTTATG       | cloning of pET- <i>clxBCDE</i>                                                       |
| pET28a- <i>clxBCDE</i> rev  | TTTGCTGTCCACCAGTCATGCTAGCTTATACAACGAAAACCTTGT         | cloning of pET- <i>clxBCDE</i>                                                       |
| pETDuet- <i>clxB</i> fwd1   | TTAAGTATAAGAAGGAGATATACATATGATTAACAAAAAGATTT          | cloning of pET- <i>clxB</i>                                                          |
| pETDuet- <i>clxB</i> rev1   | GGTGGCAGCAGCCTAGGTTAATTAATTTTTCTATTATATTTTC           | cloning of pET- <i>clxB</i>                                                          |
| pETDuet- <i>clxE</i> fwd    | AACTTTAAGAAGGAGATATACCATGAGAGGTAATACAGTAGATT          | cloning of pET- <i>clxE</i>                                                          |
| pETDuet- <i>clxE</i> rev    | GCGCGCCGAGCTCGAATTCGGATCCTTATACAACGAAAACCTTGT         | cloning of pET- <i>clxE</i>                                                          |
| pETDuet- <i>clxB</i> fwd2   | TTAAGTATAAGAAGGAGATATACATATGATTAACAAAAAGATTT          | cloning of pET- <i>clxBE</i>                                                         |
| pETDuet- <i>clxB</i> rev2   | GGTGGCAGCAGCCTAGGTTAATTAATTTTTCTATTATATTTTC           | cloning of pET- <i>clxBE</i>                                                         |
| pET28- <i>clxA</i> fwd      | TTTAACTTTAAGAAGGAGATATACCATGTATAAAATACTAAAGATGA       | cloning of pET- <i>clxA</i>                                                          |
| pET28- <i>clxA</i> rev      | GTCCACCAGTCATGCTAGCCATATGTTAATCTACATATTCTACAT         | cloning of pET- <i>clxA</i>                                                          |
| pET28- <i>clxC</i> fwd1     | ATATGTAGATTAACATATGGCTAGGTGACTATTTTAGAATTATGT         | cloning of pET- <i>clxAC</i>                                                         |
| pET28- <i>clxC</i> rev1     | GTCGACGGAGCTCGAATTCGGATCCCTAGTCTTCGTAAGTACTC          | cloning of pET- <i>clxAC</i>                                                         |
| pET28- <i>clxCD</i> fwd1    | ATATGTAGATTAACATATGGCTAGGTGACTATTTTAGAATTATGT         | cloning of pET- <i>clxACD</i>                                                        |
| pET28- <i>clxCD</i> rev1    | GTCGACGGAGCTCGAATTCGGATCCCTAGTCTTCGTAAGTACTC          | cloning of pET- <i>clxACD</i>                                                        |
| pET28- <i>clxC</i> fwd2     | ACTTTAAGAAGGAGATATACCATGTTGTTAATAATCAATAATAA          | cloning of pET- <i>clxC</i>                                                          |
| pET28- <i>clxC</i> rev2     | GTCCACCAGTCATGCTAGCCATATGCTAGTCTTCGTAAGTACTC          | cloning of pET- <i>clxC</i>                                                          |
| pET28- <i>clxD</i> fwd2     | TTTAACTTTAAGAAGGAGATATACCATGATTATAGATGCACATGCTC       | cloning of pET- <i>clxD</i>                                                          |
| pET28- <i>clxD</i> rev2     | TTTGCTGTCCACCAGTCATGCTAGCTTAACCTCTTTCTGTAATAAATT<br>T | cloning of pET- <i>clxD</i>                                                          |

## SUPPORTING INFORMATION

**Table S4.** Sequence of the cassette for CRISPR-Cas9n-based gene knockout. *Italic* sequence represents restriction sites; underlined sequences represent miniP4, protospacer and sgRNA; homologous arms are marked in grey; insert is marked in green.

| Name           | Sequence (5' – 3')                                                                                                                                                                                                                                                                                                                                                                                                                                                                                                                                                                                                                                                                                                                                                                                                                                                                                                                                                                                                                                                                                                                                                                                                                                     | Purpose                         |
|----------------|--------------------------------------------------------------------------------------------------------------------------------------------------------------------------------------------------------------------------------------------------------------------------------------------------------------------------------------------------------------------------------------------------------------------------------------------------------------------------------------------------------------------------------------------------------------------------------------------------------------------------------------------------------------------------------------------------------------------------------------------------------------------------------------------------------------------------------------------------------------------------------------------------------------------------------------------------------------------------------------------------------------------------------------------------------------------------------------------------------------------------------------------------------------------------------------------------------------------------------------------------------|---------------------------------|
| <i>clxA-ko</i> | 5'- <i>TACCGCGAGACCTTGACAAATTTATTTTTTAAAGTTAAAATTAAGTTGTCAGTAAGCCAAGTTGAAACGTTTTAG</i><br><i>AGCTAGAAATAGCAAGTTAAAATAAGGCTAGTCCGTTATCAACTTGAAAAAGTGGCACCGAGTCGGTGCTTTTTT</i><br><i>TGAATTCCTAGAGTCGAATTTAAAGTTAATAATTTTGAATAAACTTACAAAATATTATTAATTTAATTTTTAAG</i><br><i>GGTCATTTGTTAAATTATTGAATTTAATATATTGTATAAATACTAAAGATGAAATTAACAAATTTGCAAATTTT</i><br><i>GTTATTTAATAGTATAATACATTCATATTTAGCAAAAAATACACTTTTTCAAACCTAAAGGAGGTAATTATGGACA</i><br><i>GTAATCCCAATTAATAACAAAATTGAATTCAGCATTACAAATTGCTACAAAAGCCAACCTTTTACAAGGACAGGCT</i><br><i>AGGTAATATTGAAATTAATCTTTAGATGATTTTTCAAATTACCTTTAACTACAAAAGAAGACCTTCGAAAGCTAA</i><br><i>AACCAATGGAAGCTTTAACTGTAGATATAGAAGACCTTTCCAATATCACGAATCTTTTGGATAGATATCACTTG</i><br><i>GCTTACTGAAAAAGATTTAATGCTTATGGAGATCACTAAATGAATTTGGAGTAAATTTCAAAGTACAGATATT</i><br><i>GTATTAATAGATCCCATATGCTATTTTCAAGTCCAGCTCATATCTTTACCAATGCAATTCATAAGAAAGGAGCTT</i><br><i>GTGTTATACCGTTAGTAAGGCCTCAGCAATTTACCATTAAAAAGAGTTGCTAATCTAATTTATAAACTACGCC</i><br><i>AAGCATTCTTACTGGAATTCCAGATGAATTAATAAACTTAATAAAGTTGCTAAGTTTATGGACATATCCCTTAAAG</i><br><i>ATCTTGTTGCATTAGAGCAATATGTAAGTCTGGAGAAATGCTTTCTGAAGGAAGGAAAGCTAACTAGAAAGCA</i><br><i>TCTTTGGAGCTAAAGTCTATAATTTATGGATGTACAGAGTGTG</i> <b>TAAGATATC</b> <i>TGCGTGGAGACC-3'</i> | cloning pCas-<br><i>clxA-ko</i> |



## Results and Discussion

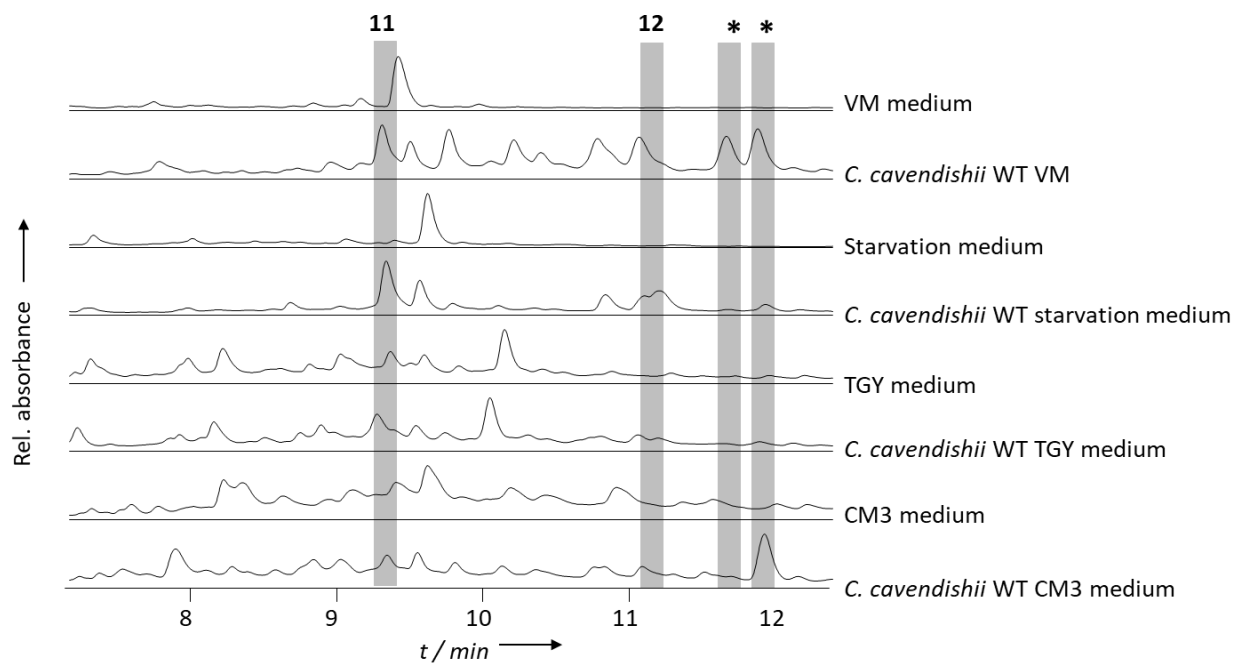

**Figure S1.** Metabolite profiles of extracts from *C. cavendishii* cultivated under varying conditions. Displayed are HPLC profiles when cultured in full (TGY medium), semi-defined (CM3, VM) and starvation medium (VM medium with reduced carbon source:  $0.05 \text{ g L}^{-1}$  cellobiose). No growth was observed in minimal medium (P2 medium). Asterisks (\*) indicate signals corresponding to putative congeners (the earlier eluting compound is referred to as congener 1 and the later eluting compound as congener 2 in Figure S2 and S3). Based on the results of this media screen, cultivation of *C. cavendishii* Rif1 was scaled up in VM (Figure 2A)

## SUPPORTING INFORMATION

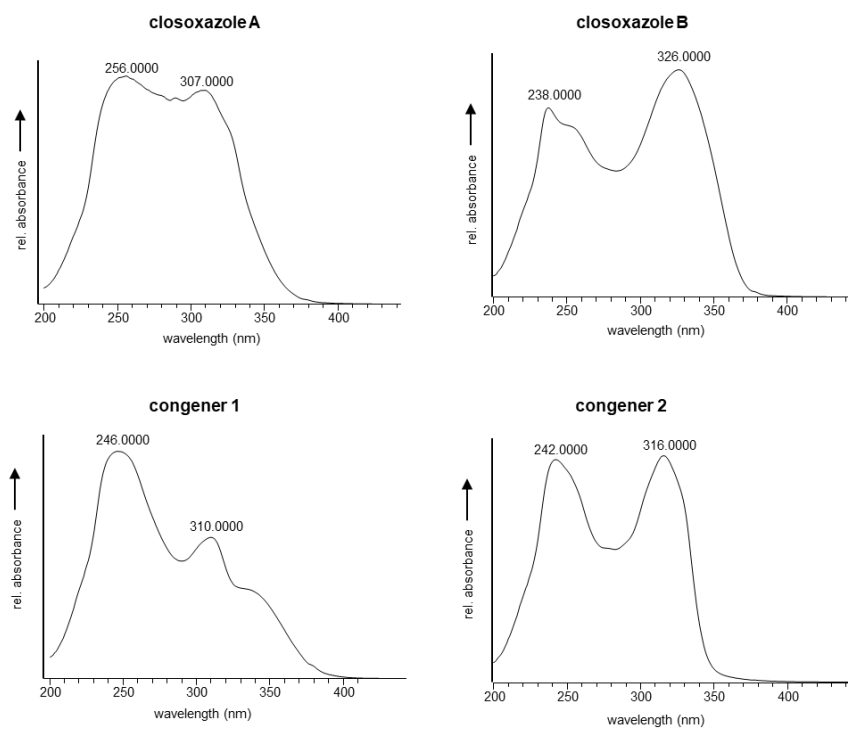

**Figure S2.** UV/Vis spectra of closoxazoles produced by *C. cavendishii*. UV/Vis spectra detected in ethyl acetate extract of *C. cavendishii* corresponding to closoxazole A and B and the two putative congeners.

## SUPPORTING INFORMATION

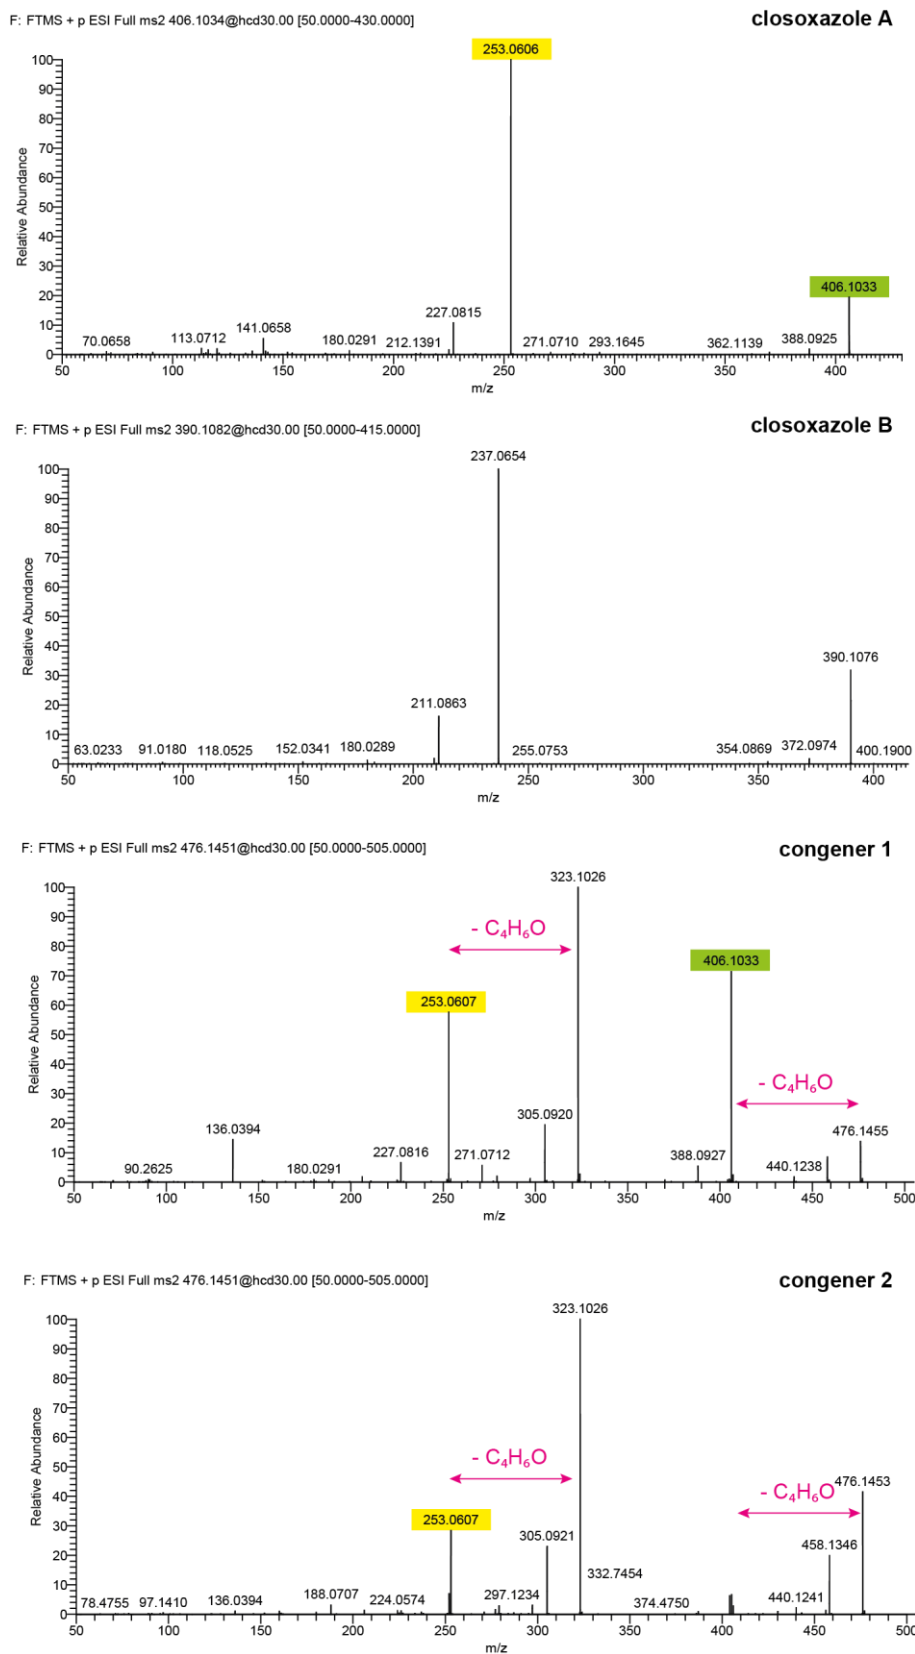

**Figure S3.** MS/MS fragmentation patterns of closoxazoles from *C. cavendishii*. MS/MS fragmentation patterns of  $m/z$  406.1034  $[M+H]^+$  (**11**),  $m/z$  390.1082  $[M+H]^+$  (**12**) and  $m/z$  476.1451  $[M+H]^+$  from ethyl acetate extracts of *C. cavendishii* Rif1 cultures. Fragments that indicate a shared core structure of the respective compound are marked in green and yellow. The fragmentation patterns from the respective  $[M+H]^+$  ionic species of the later eluting pair of metabolites indicate a loss of  $m/z$  70.0419 (calculated sum formula  $C_4H_6O$ , marked in pink), suggesting them to be *N*- or *O*-acylated derivatives of closoxazole A.

## SUPPORTING INFORMATION

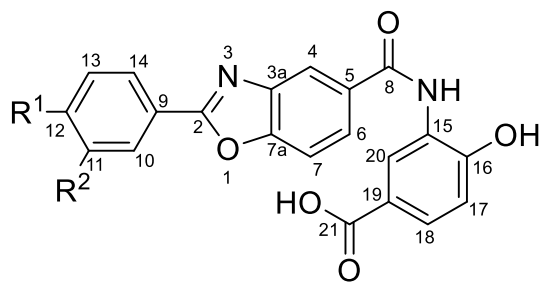

**Figure S4.** Alternative C-atom numbering of **11** and **12**. The carbon atoms of the closoxazoles are numbered according to previously reported benzoxazole-based natural products.

## SUPPORTING INFORMATION

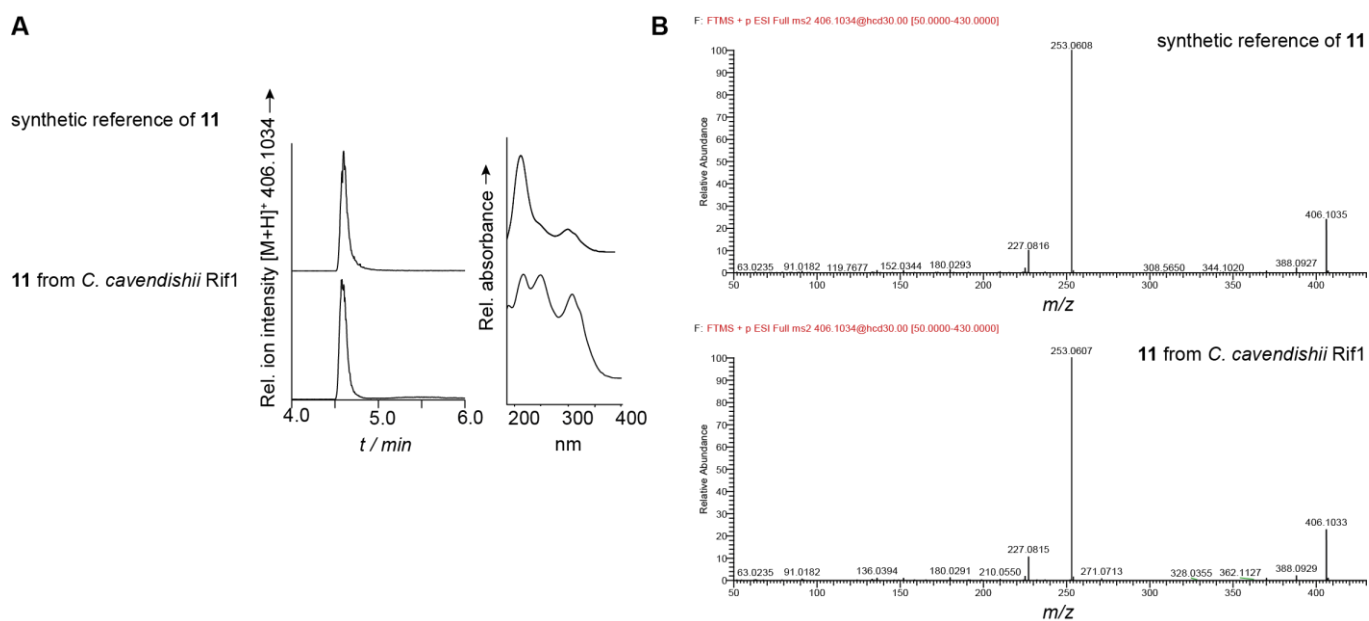

**Figure S5.** Comparison of the synthetic reference compound of **11** and **11** isolated from *C. cavendishii* Rif1. A) LC-HRMS with extracted ion chromatograms (EICs) corresponding to the  $[M+H]^+$  ionic species of closoxazole A and the corresponding UV/Vis spectra. B) MS/MS fragmentation patterns of the  $[M+H]^+$  ionic species of **11**.

## SUPPORTING INFORMATION

**Table S5.** NMR shifts of closoxazole A (**11**) isolated from the native producer and its synthetic reference in DMSO- $d_6$ 

| <b>11 from <i>C. cavendishii</i> Rif1</b> | <b>Synthetic Reference of 11</b> | <b>Difference</b> |
|-------------------------------------------|----------------------------------|-------------------|
| $\delta C$ [ppm]                          | $\delta C$ [ppm]                 |                   |
| 110.41                                    | 110.51                           | -0.10             |
| 112.74                                    | 113.09                           | -0.36             |
| 114.49                                    | 114.62                           | -0.14             |
| 115.56                                    | 115.62                           | -0.05             |
| 117.06                                    | 117.15                           | -0.09             |
| 117.08                                    | 117.48                           | -0.40             |
| 118.56                                    | 118.62                           | -0.06             |
| 121.43                                    | 121.49                           | -0.06             |
| 124.64                                    | 124.74                           | -0.10             |
| 125.59                                    | 125.63                           | -0.05             |
| 126.31                                    | 126.40                           | -0.09             |
| 127.75                                    | 127.85                           | -0.10             |
| 131.04                                    | 131.11                           | -0.07             |
| 137.40                                    | 137.02                           | 0.38              |
| 142.01                                    | 142.04                           | -0.03             |
| 148.26                                    | 148.49                           | -0.23             |
| 152.13                                    | 152.20                           | -0.06             |
| 154.07                                    | 154.15                           | -0.09             |
| 164.84                                    | 164.86                           | -0.02             |
| 165.11                                    | 165.22                           | -0.10             |
| 167.08                                    | 167.16                           | -0.08             |



## SUPPORTING INFORMATION

Determination of *clx* gene cluster boundaries

Genome Neighborhood Diagrams showed that the ten open reading frames upstream and downstream were not conserved outside *C. cavendishii*, suggesting that *clxA–clxE* are sufficient for the biosynthesis of closoxazoles.

**Table S6.** Annotated functions of open reading frames of the *clx* biosynthetic gene cluster and the surrounding genomic region. ORFs of *clx* are shaded in grey.

| Name        | Locus tag     | Size   | Annotated function                                    | Protein homolog and origin <sup>[a]</sup> | Percent identity/similarity (%) |
|-------------|---------------|--------|-------------------------------------------------------|-------------------------------------------|---------------------------------|
|             | BUB01_RS09125 | 598 aa | Thiamine pyrophosphate-binding protein                |                                           |                                 |
|             | BUB01_RS09130 | 217 aa | HAD hydrolase-like protein                            |                                           |                                 |
| <i>clxA</i> | BUB01_RS09135 | 440 aa | PaaK-like                                             | NatL2<br><i>Streptomyces</i> sp. Tü 6176  | 27.1/44.0                       |
| <i>clxB</i> | BUB01_RS09140 | 375 aa | 3-Amino-4-hydroxybenzoic acid synthase                | GriH<br><i>Streptomyces griseus</i>       | 37.9/54.9                       |
| <i>clxC</i> | BUB01_RS09145 | 442 aa | PaaK-like                                             | NatL2<br><i>Streptomyces</i> sp. Tü 6176  | 22.8/37.4                       |
| <i>clxD</i> | BUB01_RS09150 | 255 aa | Amidohydrolase                                        | NatAM<br><i>Streptomyces</i> sp. Tü 6176  | 10.1/16.3                       |
| <i>clxE</i> | BUB01_RS09155 | 274 aa | 2-Amino-3,7-dideoxy-D-threo-hept-6-ulosonate synthase | GrI<br><i>Streptomyces griseus</i>        | 31.7/51.8                       |
|             | BUB01_RS09160 | 189 aa | Hypothetical protein                                  |                                           |                                 |
|             | BUB01_RS09170 | 328 aa | Gfo/Idh/MocA family oxidoreductase                    |                                           |                                 |

<sup>[a]</sup> Selected homologs reported to be involved in benzoxazole formation or 3,4-AHBA biosynthesis.

## SUPPORTING INFORMATION

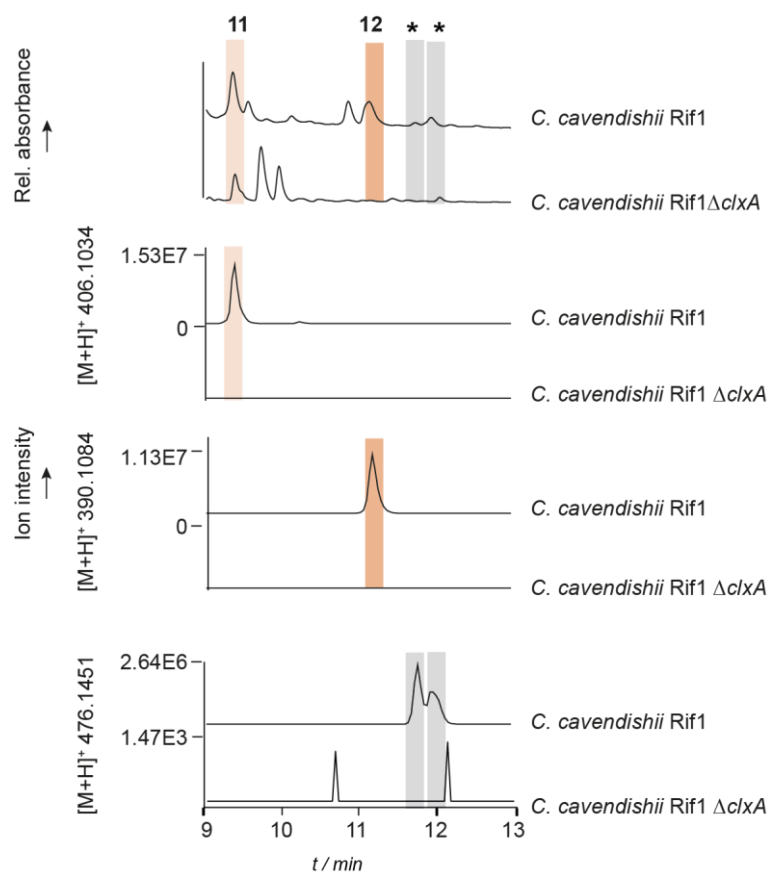

**Figure S6.** Detection of closoxazoles in *C. cavendishii* Rif1 and *C. cavendishii* Rif1 $\Delta$ clxA extracts. Shown are HPLC chromatograms and EICs corresponding to the  $[M+H]^+$  ionic species of closoxazoles A, B (11, 12) and putative congeners (marked with asterisks) from crude extracts of *C. cavendishii* Rif1 and from *C. cavendishii* Rif1 $\Delta$ clxA. EICs of the calculated exact mass of the compounds are shown with  $m/z \pm 5$  ppm.

## SUPPORTING INFORMATION

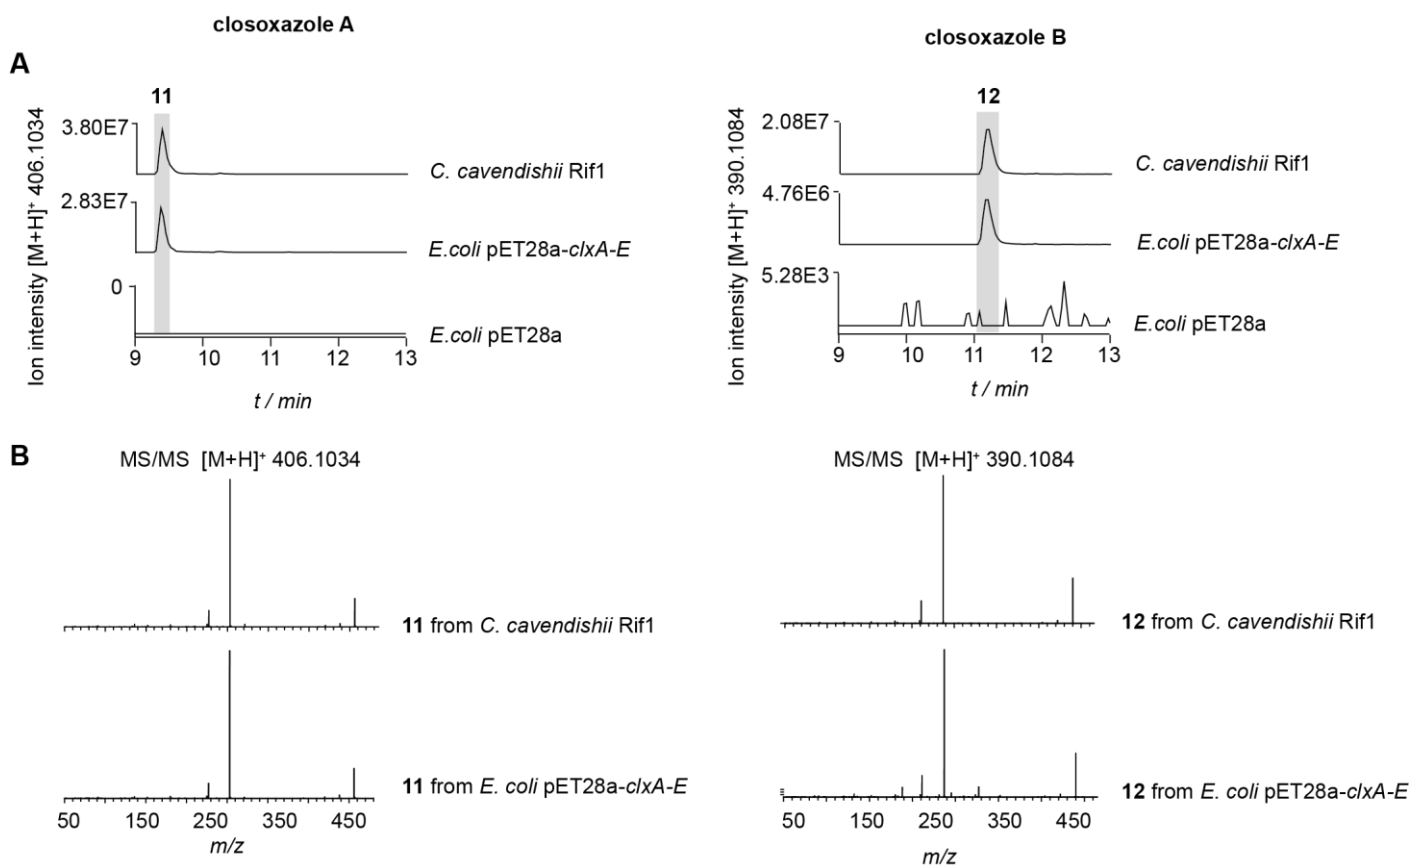

**Figure S7.** Production of closoxazole A and B by *C. cavendishii* Rif1 and *E. coli* pET28a-clxA-E. A) Extracted ion chromatograms (EICs) corresponding to the  $[M+H]^+$  ionic species of closoxazoles A (**11**) and B (**12**) from crude extracts of the native producer *C. cavendishii* Rif1 and from *E. coli* pET28a-clxA-E (heterologous producer). EICs of the calculated exact mass of the compounds are shown with  $m/z \pm 5$  ppm. B) MS/MS fragmentation patterns of **11** and **12** isolated from *C. cavendishii* Rif1 and *E. coli* pET28a-clxA-E.

## SUPPORTING INFORMATION

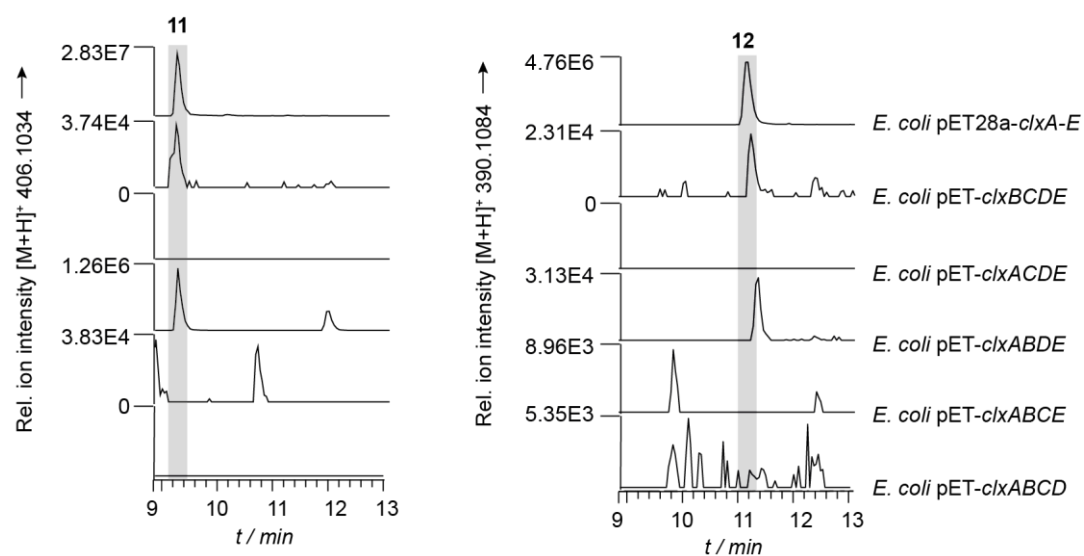

**Figure S8.** Production of closoxazole A (**11**) and B (**12**) by *E. coli* encoding the listed combinations of *clx* biosynthetic genes. Shown are EICs corresponding to the  $[M+H]^+$  ionic species of **11** and **12** from crude extracts of *E. coli* expressing the full *clx* gene cluster and the *clx* gene cluster missing each of the genes in turn. EICs of the calculated exact mass of the compounds are shown with  $m/z \pm 5$  ppm. Trace amounts of closoxazole A and B can be detected in the metabolic profile of *E. coli* pET-*clxBCDE* (lacking ClxA) and reduced production in the metabolic profile of *E. coli* pET-*clxABDE* (lacking ClxC). This is probably due to promiscuous activity of either ClxC or ClxA, respectively, or other ANL superfamily members encoded in the *E. coli* genome.

## SUPPORTING INFORMATION

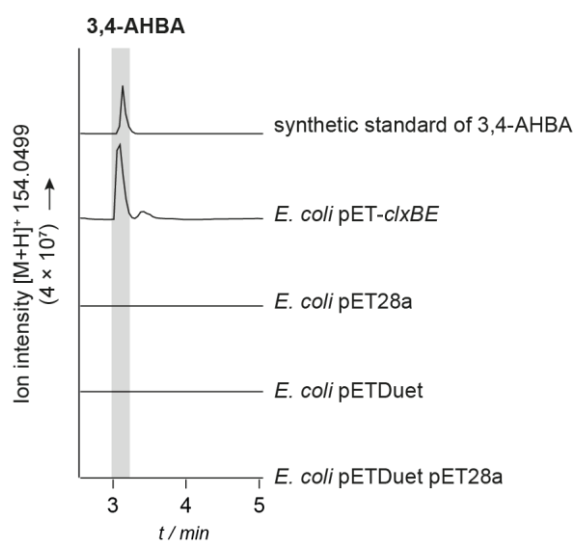

**Figure S9.** Production of 3,4-AHBA by *E. coli* pET-clxBE. Shown are EICs corresponding to the  $[M+H]^+$  ionic species of 3,4-AHBA: 3,4-AHBA synthetic standard, and 3,4-AHBA from crude extracts of *E. coli* pET-clxBE and *E. coli* carrying one or both of the relevant empty vectors used in this study.

## SUPPORTING INFORMATION

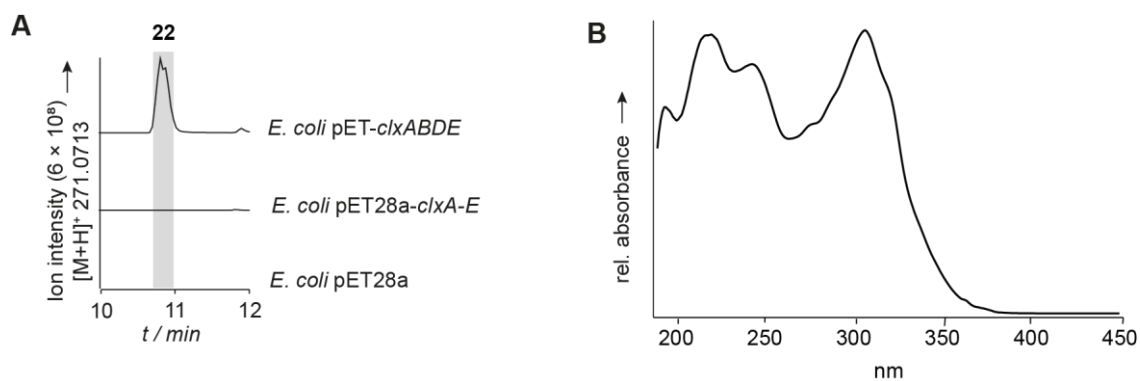

**Figure S10.** Detection of benzoxazole dimer **22** in *E. coli* pET-*clxABDE* extracts. Extracted ion chromatograms (EIC) of [M+H]<sup>+</sup> 271.0713, with the corresponding sum formula (C<sub>14</sub>H<sub>10</sub>N<sub>2</sub>O<sub>4</sub>) matching that of a benzoxazole derived from two 3,4-AHBA units (**22**), are shown for organic extracts of *E. coli* pET-*clxABDE* (lacking *ClxC*) and *E. coli* pET28a-*clxA-E* (complete *clx* gene cluster). EICs of the calculated exact mass of the compounds are shown with  $m/z \pm 5$  ppm. B) Absorption spectrum of **22** detected from organic culture extracts of *E. coli* pET-*clxABDE*.



## SUPPORTING INFORMATION

F: FTMS + p ESI Full ms2 271.0713@hcd40.00 [50.0000-295.0000]

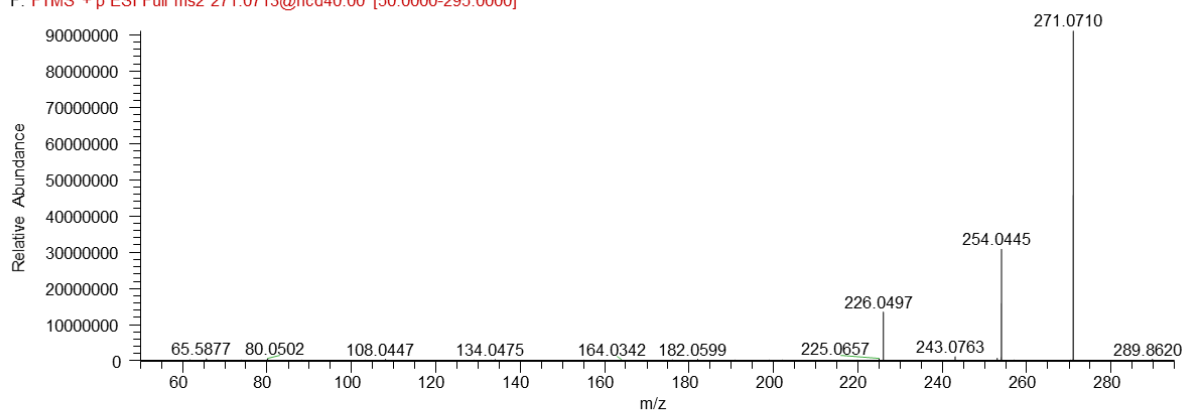

F: FTMS + p ESI Full ms2 271.0706@hcd40.00 [50.0000-295.0000]

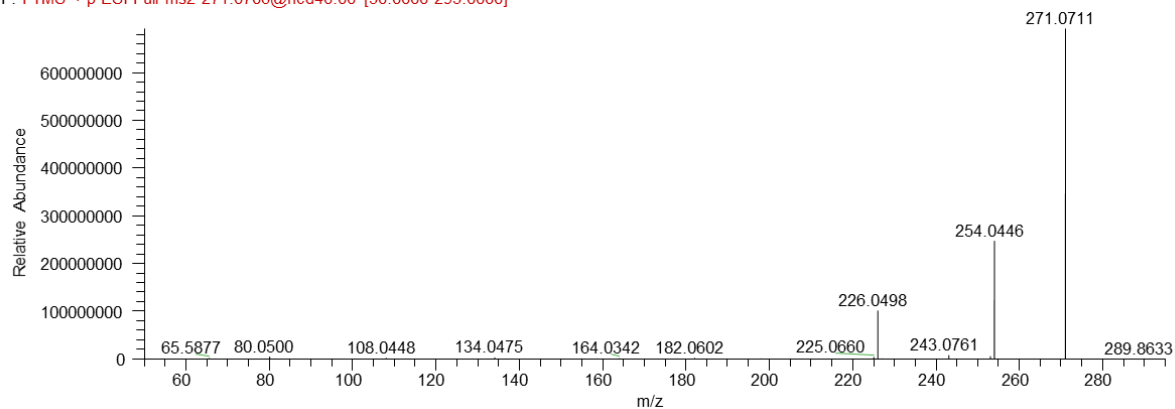

**Figure S11.** MS/MS fragmentation patterns of synthetic and *E. coli*-derived benzoxazole dimers **22**. MS/MS fragmentation patterns were generated from the respective  $[M+H]^+$  ionic species of **22** detected in the HRMS profile of the synthetic reference (upper panel) and crude extract from *E. coli* pET-*clxABDE* (lower panel).

## SUPPORTING INFORMATION

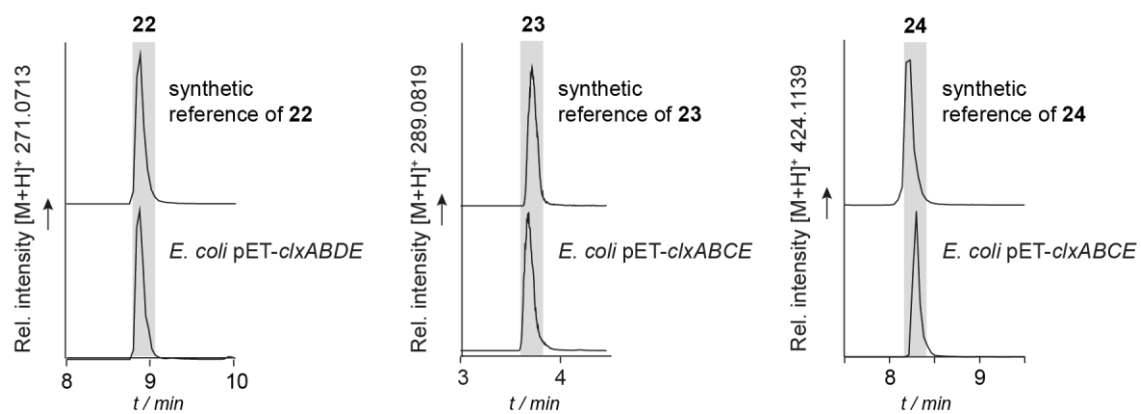

**Figure S12.** HR-LCMS analysis of synthetic reference of **22–24** and heterologously produced **22–24**. Shown are EICs corresponding to the [M+H]<sup>+</sup> ionic species of benzoxazole dimer **22**, the amide dimer **23** and trimer **24** of the synthetic standards, as well as from crude extracts of *E. coli* pET-*clxABCE* (lacking *clxD*) and *E. coli* pET-*clxABDE* (lacking *clxC*).

## SUPPORTING INFORMATION

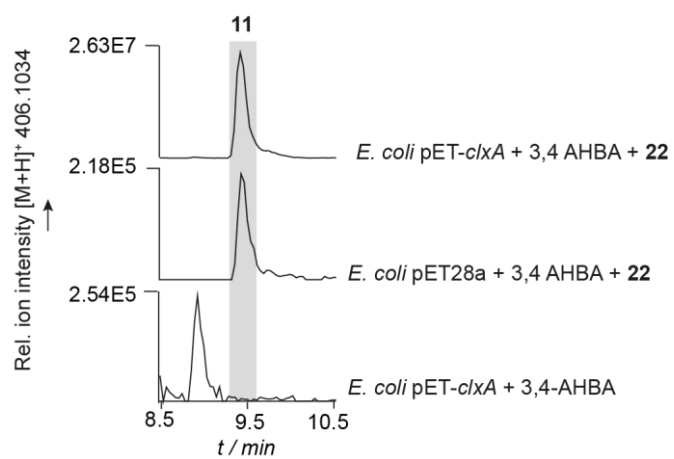

**Figure S13. Supplementation of *E. coli* pET-*clxA* with the benzoxazole dimer 22.** Shown are EICs corresponding to the [M+H]<sup>+</sup> ionic species of closoxazole A (11) from crude extracts of *E. coli* pET-*clxA* and *E. coli* pET28a (empty vector control) both supplemented with 22 and 3,4-AHBA, and *E. coli* pET-*clxA* supplemented with 3,4-AHBA alone.

## SUPPORTING INFORMATION

|       |                                                                 |     |
|-------|-----------------------------------------------------------------|-----|
| ClxA  | MYKYTKDEIKTNLQILLFNSIIHSYLAKKYTFSNLKEVIMDSNSQLITKLNLSALQIATKA   | 60  |
| NatL2 | -----MSRSR---PELGDWSSPAELAE LQR-----SQLPRVLAQALRS               | 35  |
| BomJ  | -----MTR---PEIGDWKSIEELRGLQE---RQLPPLLARAARS                    | 33  |
|       | : : :.. *: .. :*                                                |     |
| ClxA  | NFYKDRL-GNIEIKSLDDFSKLP LTTKEDLRKLPMEALTVDIEDLFQYHESFGTTGEPV    | 119 |
| NatL2 | PFYAARYRGTTTPRTADDFAGVEVTAKQDLRDQYPFGLAVGREHLATYHESSTGAGEPT     | 95  |
| BomJ  | PFYRSRHTGRSAPATPADLRSLPTSQDLRDAYPFGLLAVNRTELATYHESSTGAGOPT      | 93  |
|       | ** * * : * : : * : * : * : * : * : * : * : * : * : * : * : *    |     |
| ClxA  | STWLTEKDFNAYGDQLNEFGVNFKSTDIVLNRFPAISVPAHIFTNAIHKKGACVIPVSK     | 179 |
| NatL2 | ASYYTEEDWTDLAERFARKWGTGIHPSDTFLVTRTPYGLVITGH LAQAAGRLRGATVVPGDA | 155 |
| BomJ  | ASYYTQNDWADLAERYARKWVGIEPSDVF LVRTPYALMITGH LAQAAARSKGATVVPADS  | 153 |
|       | ::: * : * : : : : . . . . . : * * * * : : : * : : * : * : * .   |     |
| ClxA  | ASAI SPLKRVANLIYKLRPSILT GIPDELIKLNKVAKFMDI-SLKDLGCIRAICTAGEML  | 238 |
| NatL2 | RSLATPLSRMVRVLKTLDTLTLWCNPT EITMLAAAAKAAGLRPDQDFPHLRAMFTA AEP   | 215 |
| BomJ  | RSYT-----AVRLHLRGLVTLT WSNPTETLLWAAAAARAAGLDPTDFPSLRALFVGGEP    | 208 |
|       | * : : : * : : * : * : * : * : * : * : * : * : * : * : * : *     |     |
| ClxA  | SEGRKAKLESIFG-AKVYNYGCT ECGNMAASCDEGHLHISKD-FYVEILDVPTLKPVKE    | 296 |
| NatL2 | TEVRRRRLSEIWGGIPVVEEYGST ETGTIAGOCPEGRMHLWADRAIFEVYDPRGTG LSEA  | 275 |
| BomJ  | SPARRARIGALWN-APVVEYGST ETGTLAGOCPEGRHLWADRVLCEVLDPESGKLSEE     | 267 |
|       | : * : : : : * : * : * : * : * : * : * : * : * : * : * : * : *   |     |
| ClxA  | GKGIIVTTLNKEAFPMIRYDLGDIGEIKYEKCSGNDRPVLIHHGREIDLKTSKG TIT      | 356 |
| NatL2 | GRQM VVTPLYRDAMPLLRYNLADDEVSTDP CGCGWLLPTVTVLGRAGTGHRIGPATVT    | 335 |
| BomJ  | GRRLVVTPLYREAMPLLRYNLDDEVEVEYAD CACGWRLPVVRVLGRGGFAWPVGTGVD     | 327 |
|       | * : * : * : * : * : * : * : * : * : * : * : * : * : * : * : *   |     |
| ClxA  | FKELQEEIFKLPNSVVGDFRVKIQNDEVIVECEADEELDNSN-----SNLNLPIEVK       | 409 |
| NatL2 | QQRLEELVFSLPAAYEVMFWRAKAHPD VLELEFEAPEPVRQRAVKELGAALDRELGVPHR   | 395 |
| BomJ  | QQQVEDLVFGLPAADGVLFWRARADRL LHIQVEAREEAAAVERRLTESVARELAVPCR     | 387 |
|       | : : : : : * * * : : * : * : * : * : * : * : * : * : * : *       |     |
| ClxA  | IKRFNHGEILNIDN LIEIKPIAKPKYVEYVD-----                           | 440 |
| NatL2 | ITGLAPGTLVPAEALTAQRDILKARYLFAEDEDWDKAVMYF                       | 436 |
| BomJ  | VEALPPGKLVPTDVL T ANPDALKPRGLFGPEENWDQALLY                      | 428 |
|       | . . . * . . . * . . . .                                         |     |

**Figure S14. Sequence alignment of ClxA (*C. cavendishii*), NatL2 (*Streptomyces* sp. Tü6176) and BomJ (*S. sp.* NRRL12068).** The functions of the residues are derived from their role in structurally characterized NatL2<sup>[14]</sup>. The sequence alignment shows that the overall sequence of ClxA is similar to that of 3-HAA-using ligases. When it comes to specific features, ClxA possesses the C-terminal extension (marked in grey) similar to that observed in NatL2<sup>[14]</sup> (compared to other PaaK ligases), albeit it is ten amino acids shorter. The structurally relevant Zn<sup>2+</sup> has been described as a unique feature of NatL2; the residues that coordinate zinc in NatL2 are also conserved in ClxA. Furthermore, Lys418, a crucial residue of the nucleotide binding site in NatL2, is conserved in ClxA. Lastly, residues Thr239 and Gly237, which are involved in 3-HAA binding by NatL2, are conserved in ClxA. However, there are some obvious differences between ClxA and NatL2. For example, Pro214 and Ser88 of the NatL2 nucleotide binding pocket are not conserved in ClxA, with a Met and a Phe residue, respectively, being found at the comparable positions. ClxA also differs from NatL2 in some key residues involved in 3-HAA binding, substitutions which could conceivably influence substrate specificity. When it comes to Glu235 of NatL2, which interacts with the hydroxyl group of 3-HAA, ClxA possesses a Tyr residue at the comparable position. Furthermore, Ser238 of NatL2, which is involved in stacking interaction with the 3-HAA benzene ring, is not conserved in ClxA, which instead has a Cys residue at the comparable position.

Alignment was prepared with ClustalOmega. Residues involved in 3-HAA binding are shaded in light blue, residues surrounding the 3-HAA binding pocket are marked with a blue box. Key residues involved in Zn<sup>2+</sup> coordination are marked with a green box, residues involved in nucleotide binding are marked with a pink box. Key residues different in ClxA compared to NatL2 are marked with a red triangle, orange triangle if the residue is not conserved in any of the sequences. C-terminal extension is marked in grey. Consensus symbols as follows: asterisk (\*) indicates fully conserved residues, (:) indicates conservation between groups of strongly similar properties and (.) indicates conservation between groups of weakly similar properties.

## SUPPORTING INFORMATION

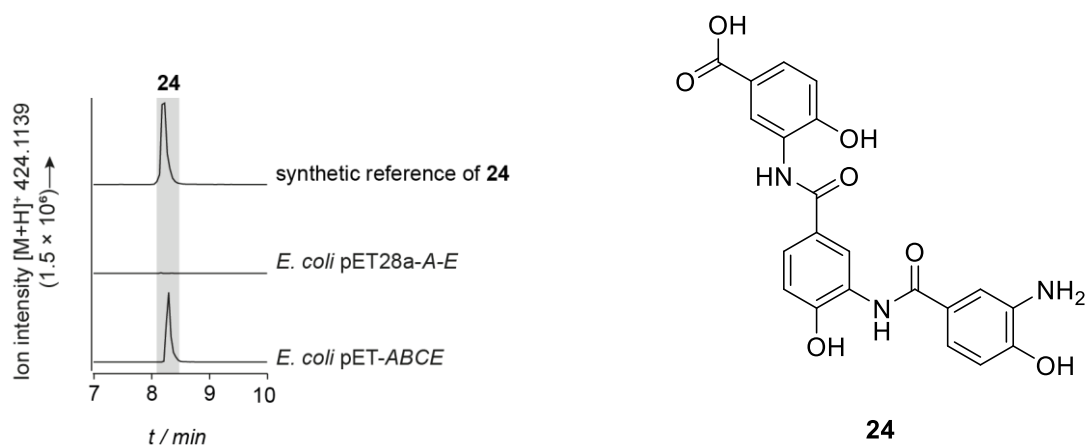

**Figure S15.** Detection of the trimer **24** produced by *E. coli* pET-*clxABCE*. Shown are EICs corresponding to the  $[M+H]^+$  ionic species of synthetic trimer **24** and **24** detected in crude extracts of *E. coli* pET28a-*clxA-E* (expressing the full *clx* biosynthetic gene cluster) and *E. coli* pET-*clxABCE* (lacking *clxD*).

## SUPPORTING INFORMATION

F: FTMS + p ESI Full ms2 289.0819@hcd10.00

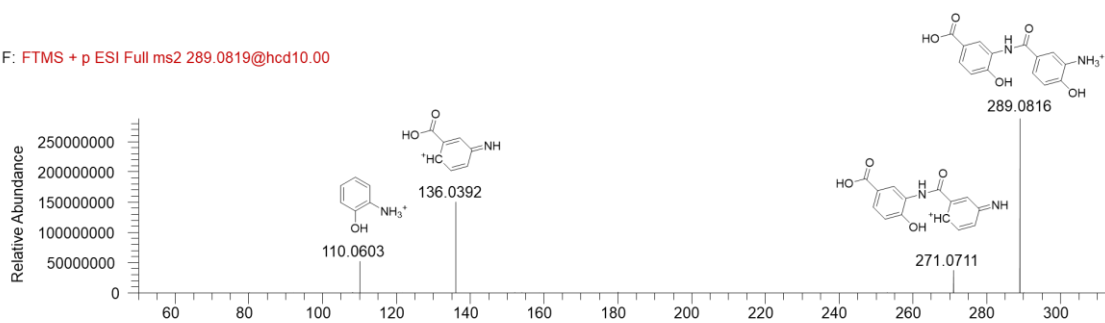

F: FTMS + p ESI Full ms2 289.0819@hcd10.00

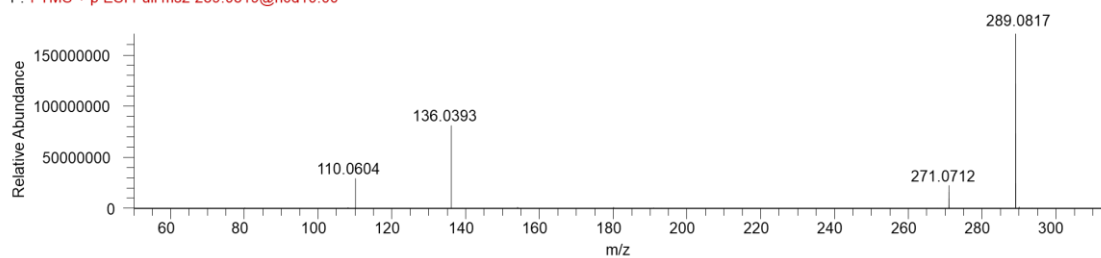

**Figure S16.** MS/MS fragmentation patterns of synthetic and heterologously produced amide dimer **23**. MS/MS fragmentation patterns were generated from the respective  $[M+H]^+$  ionic species of **23** detected in the HR-MS profile of the synthetic reference (upper panel) and crude extract of *E.coli* pET-clxABCE (lower panel).

## SUPPORTING INFORMATION

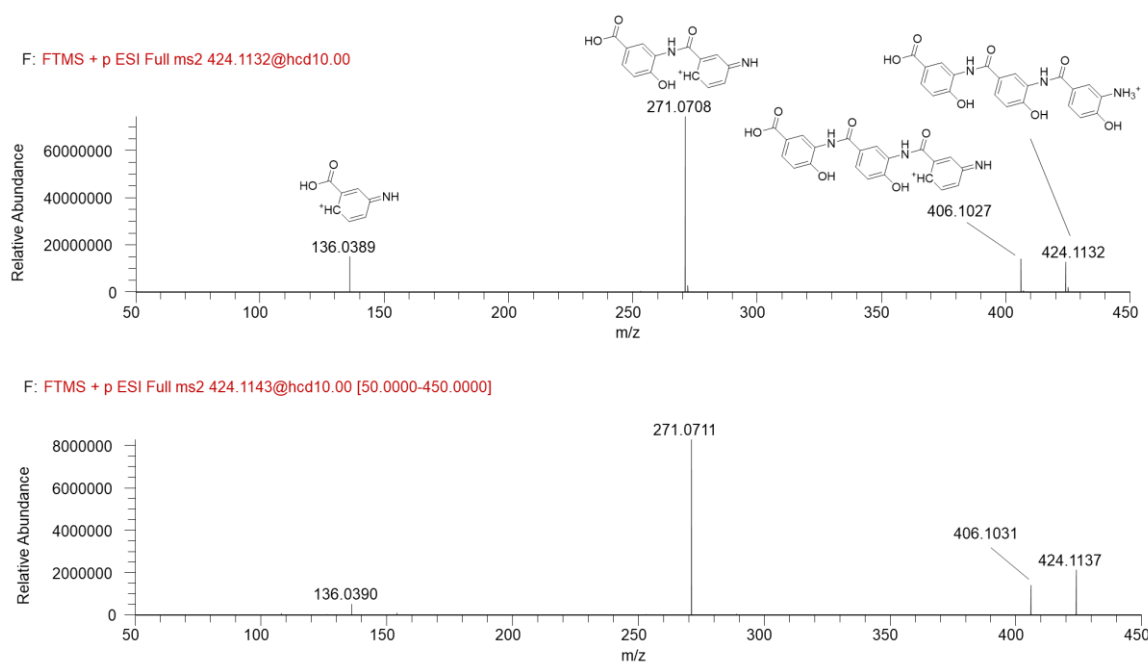

**Figure S17.** MS/MS fragmentation patterns of synthetic and heterologously produced trimer **24**. MS/MS fragmentation patterns were generated from the respective  $[M+H]^+$  ionic species of **24** detected in the HR-MS profile of the synthetic reference (upper panel) and crude extract of *E.coli* pET-clxABCE (lower panel).



## SUPPORTING INFORMATION

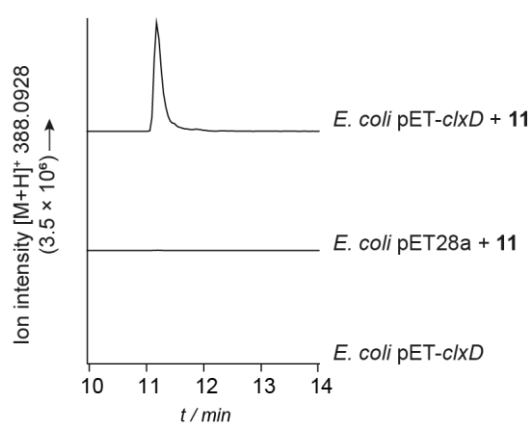

**Figure S18. Supplementation of *E. coli* pET-*clxD* with the closoxazole A (11).** Shown are EICs corresponding to the [M+H]<sup>+</sup> ionic species of which the calculated sum formula corresponds to a compound derived from 11, which contains two instead of one benzoxazole ring (calcd. for C<sub>21</sub>H<sub>14</sub>N<sub>3</sub>O<sub>6</sub>: 388.0928, found: 388.0924). Analysis of crude extracts of *E. coli* pET-*clxD* and *E. coli* pET-28a (empty vector control) supplemented with 11 and unsupplemented *E. coli* pET-*clxD*. The compound elutes later than 11, indicating a less polar molecule compared to 11, as expected if formation of a second heterocycle occurs. Minor levels of the putative double benzoxazole (1.46×10<sup>4</sup>) are detectable in *E. coli* pET-28a supplemented with 11, probably due to promiscuous/off-target activity of amidohydrolase superfamily members encoded in the host genome.

## SUPPORTING INFORMATION

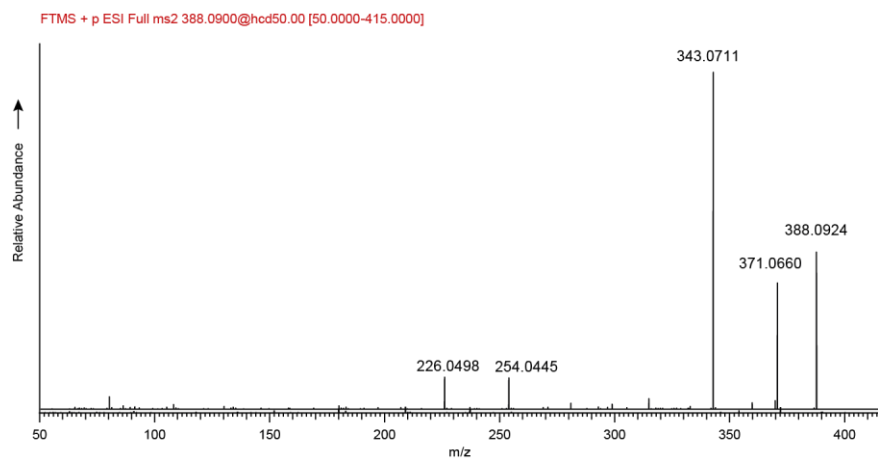

**Figure S19.** MS/MS fragmentation pattern of the putative benzoxazole carrying two heterocycles. Displayed are the  $[M+H]^+$  ionic species of which the calculated sum formula corresponds to a closoxazole-derived compound harboring two benzoxazole heterocycles. The compound was detected in the crude extract of a culture of *E. coli* pET-*clxD* supplemented with **11**. Fragmentation occurs only under high collision energy as observed for benzoxazole **22**. The fragment pattern observed shows similar mass losses (loss of 45.0219 and 17.0265) as observed for **22** (see Figure S11).

## SUPPORTING INFORMATION

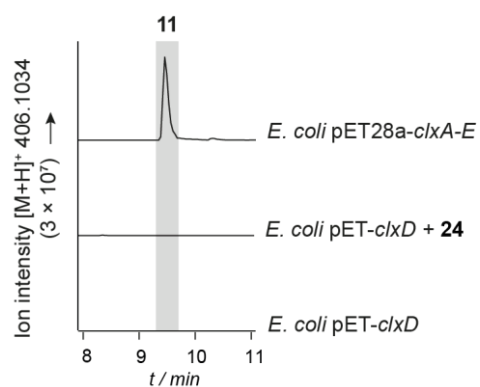

**Figure S20.** Supplementation of *E. coli* pET-*clxD* with the trimer **24**. Shown are EICs corresponding to the [M+H]<sup>+</sup> ionic species of closoxazole A (**11**) from crude extracts of *E. coli* pET28a-*clxA-E* (expressing the full closoxazole biosynthetic gene cluster), *E. coli* pET-*clxD* supplemented with the trimer **24** and *E. coli* pET-*clxD* (control).

## SUPPORTING INFORMATION

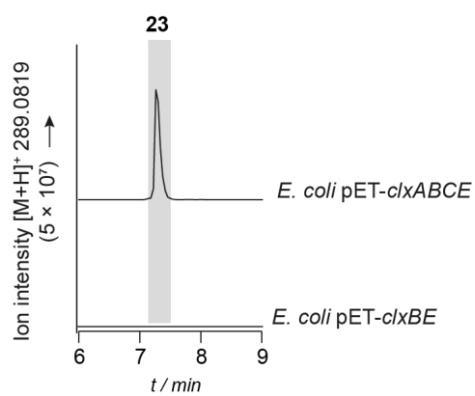

**Figure S21.** Detection of amide dimer **23** in crude extracts of *E. coli* pET-*clxBE*. Shown are EICs corresponding to the [M+H]<sup>+</sup> ionic species of dimer **23** from crude extracts of *E. coli* pET-*clxABCE* (lacking the heterocyclase ClxD) and *E. coli* pET-*clxBE* (only 3,4-AHBA biosynthetic genes). No production of dimer **23** was detected for *E. coli* pET-*clxBE*.

## SUPPORTING INFORMATION

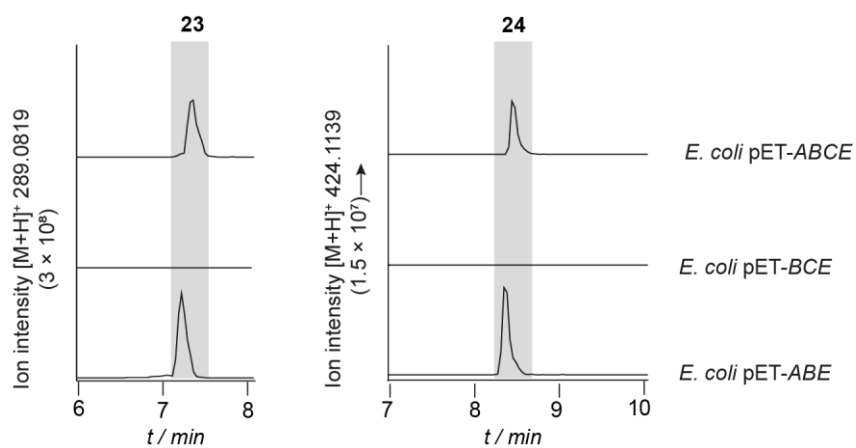

**Figure S22.** Detection of amide conjugates composed of two and three 3,4-AHBA units. The strain *E. coli* pET-*clxABCE* (lacking ClxD) produces the amide dimer **23** and trimer **24**. *E. coli* pET-*clxBCE* (lacking the first ligase ClxA and ClxD) does not produce amide dimer **23** and trimer **24**. *E. coli* pET-*clxABE* (lacking the second ligase ClxC and ClxD) produces both compounds. Shown are EICs corresponding to the [M+H]<sup>+</sup> ionic species of the dimer (**23**) and trimer (**24**).

## SUPPORTING INFORMATION

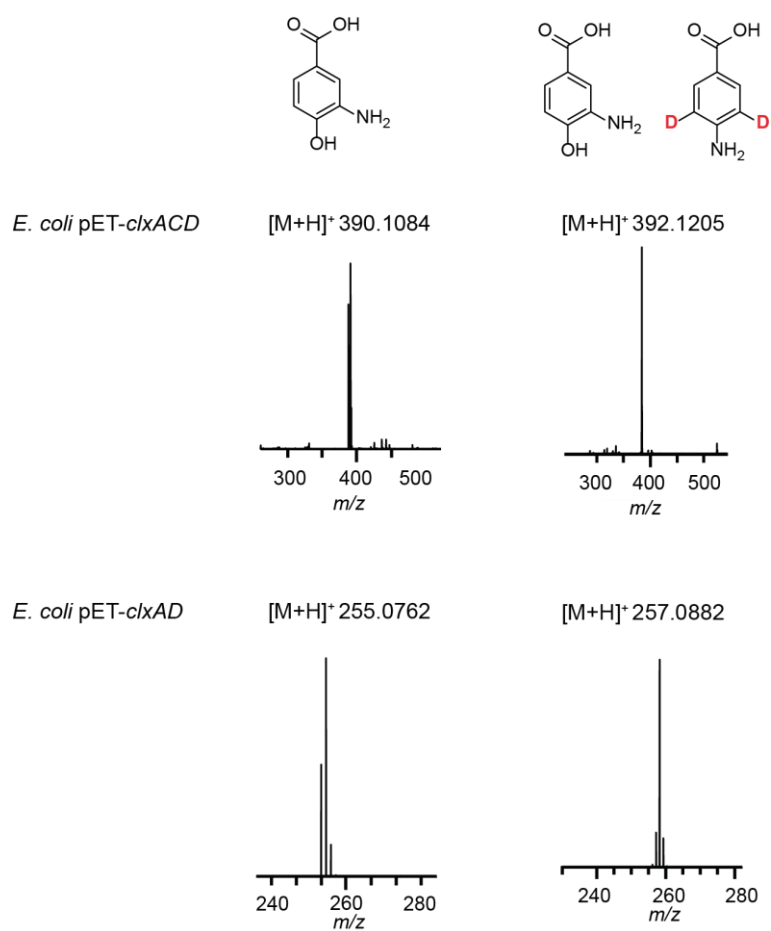

**Figure S23.** Detection of deuterated PABA incorporation into closoxazole B and its respective dimer benzoxazole. *E. coli* expressing either ClxD and the ligase ClxA (*E. coli* pET-clxAD), or ClxD and both ligases ClxA and ClxC (*E. coli* pET-clxACD), was supplemented with either synthetic 3,4-AHBA or synthetic 3,4-AHBA and deuterated PABA (PABA-d<sub>2</sub>). Incorporation of PABA-d<sub>2</sub> is demonstrated by a mass shift of 2 amu. Upper panel: ESI-MS spectra (positive ion mode) from organic culture extracts of **12** ( $[M+H]^+$  390.1084) and **12** with the predicted 2 amu mass shift ( $[M+H]^+$  392.1205), being derived from two units 3,4-AHBA and one unit PABA or PABA-d<sub>2</sub>. Lower panel: ESI-HRMS spectra (positive ion mode) from organic culture extracts of the dimer benzoxazole ( $[M+H]^+$  255.0762) derived from one unit PABA and one unit 3,4-AHBA and the dimer benzoxazole with the predicted 2 amu mass shift ( $[M+H]^+$  257.0882), derived from one unit 3,4-AHBA and one unit PABA-d<sub>2</sub>. PABA: *p*-aminobenzoic acid.

## SUPPORTING INFORMATION

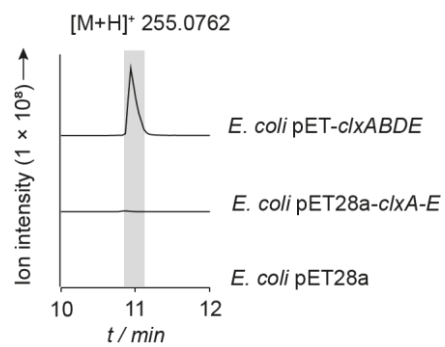

**Figure S24.** Detection of a putative benzoxazole dimer derived from PABA and 3,4-AHBA. Extracted ion chromatograms (EIC) of  $[M+H]^+$  255.0762, which has a deduced sum formula ( $C_{14}H_{10}N_2O_3$ ) matching that of a benzoxazole derived from one PABA unit and one 3,4-AHBA unit, are shown for organic extracts of *E. coli* pET-*clxABDE* (lacking *clxC*) and *E. coli* pET-*clxABDE* (complete *clx* gene cluster). EICs of the calculated exact mass of the compounds are shown with  $m/z \pm 5$  ppm.

## SUPPORTING INFORMATION

T: FTMS {1,1} + p ESI Full ms [100.00-2000.00]

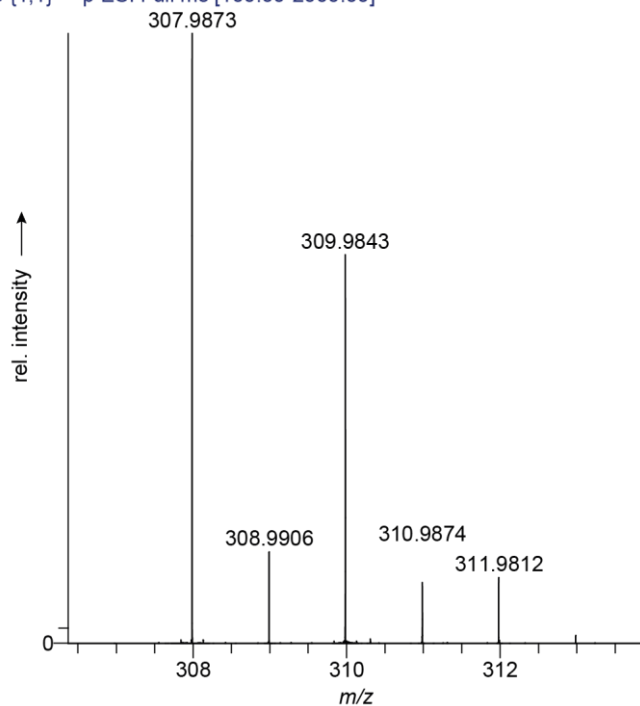

Figure S25. ESI-MS (positive ion mode) of isolated tafamidis analogue 25.



## SUPPORTING INFORMATION

## NMR Spectra

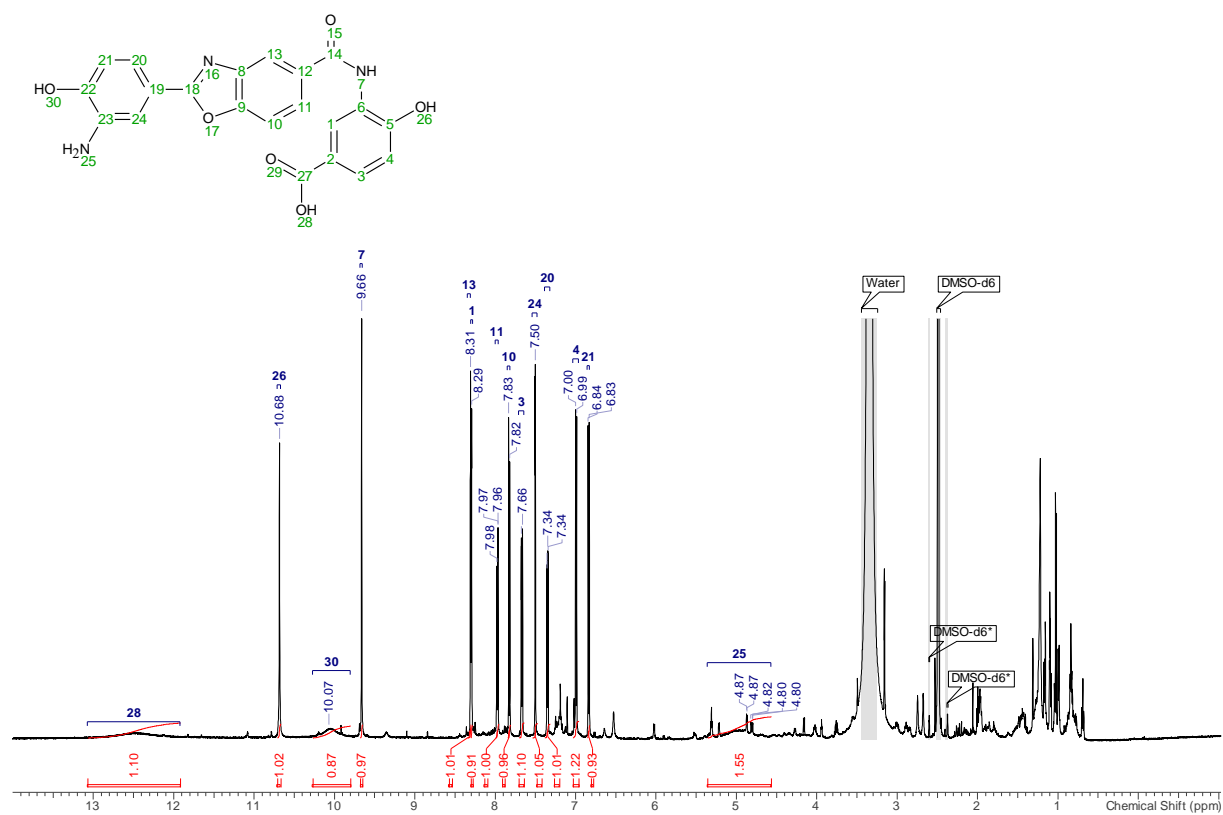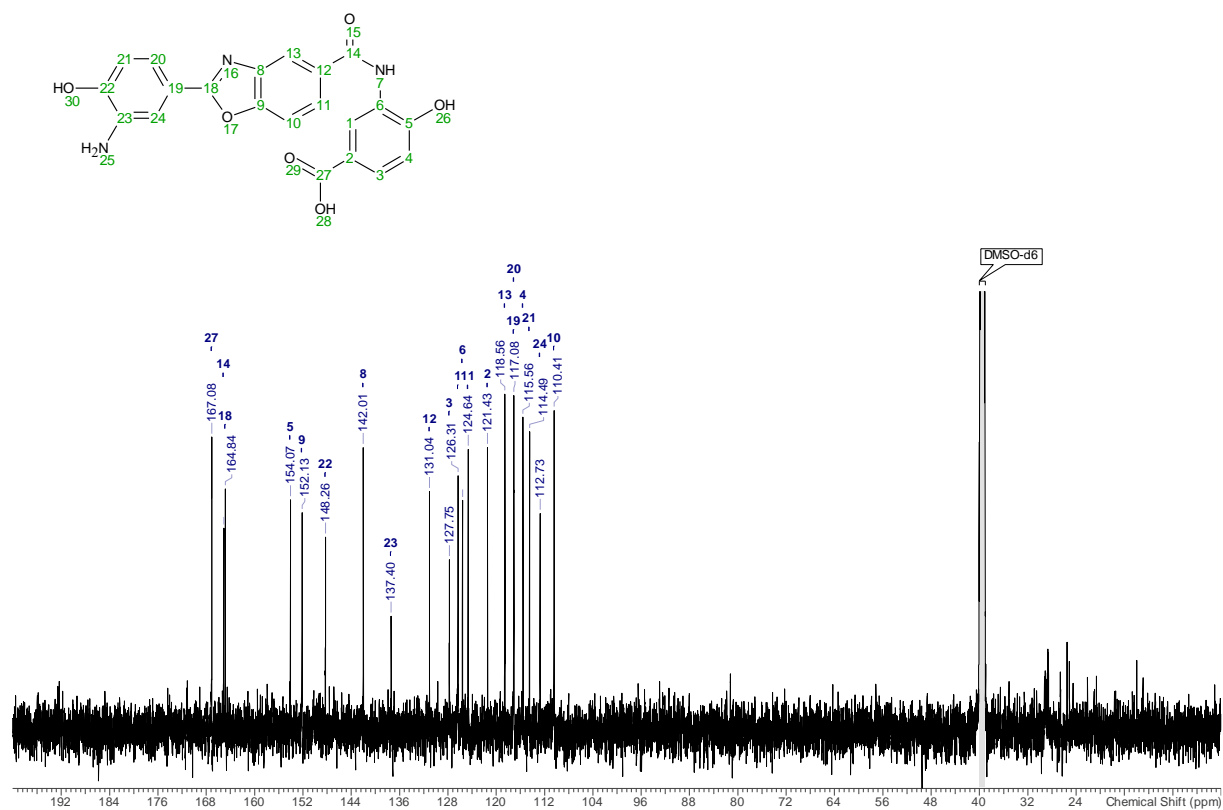

## SUPPORTING INFORMATION

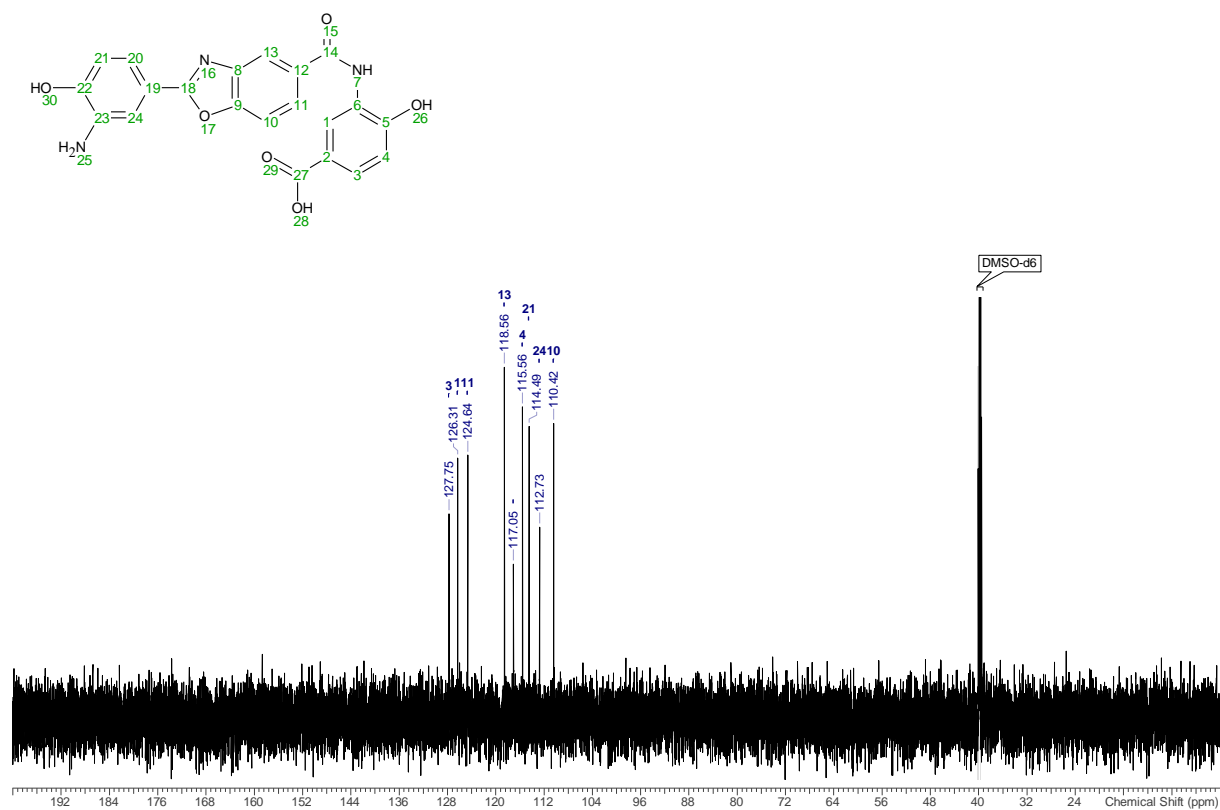

Figure S28. DEPT-135 NMR spectrum of 11.

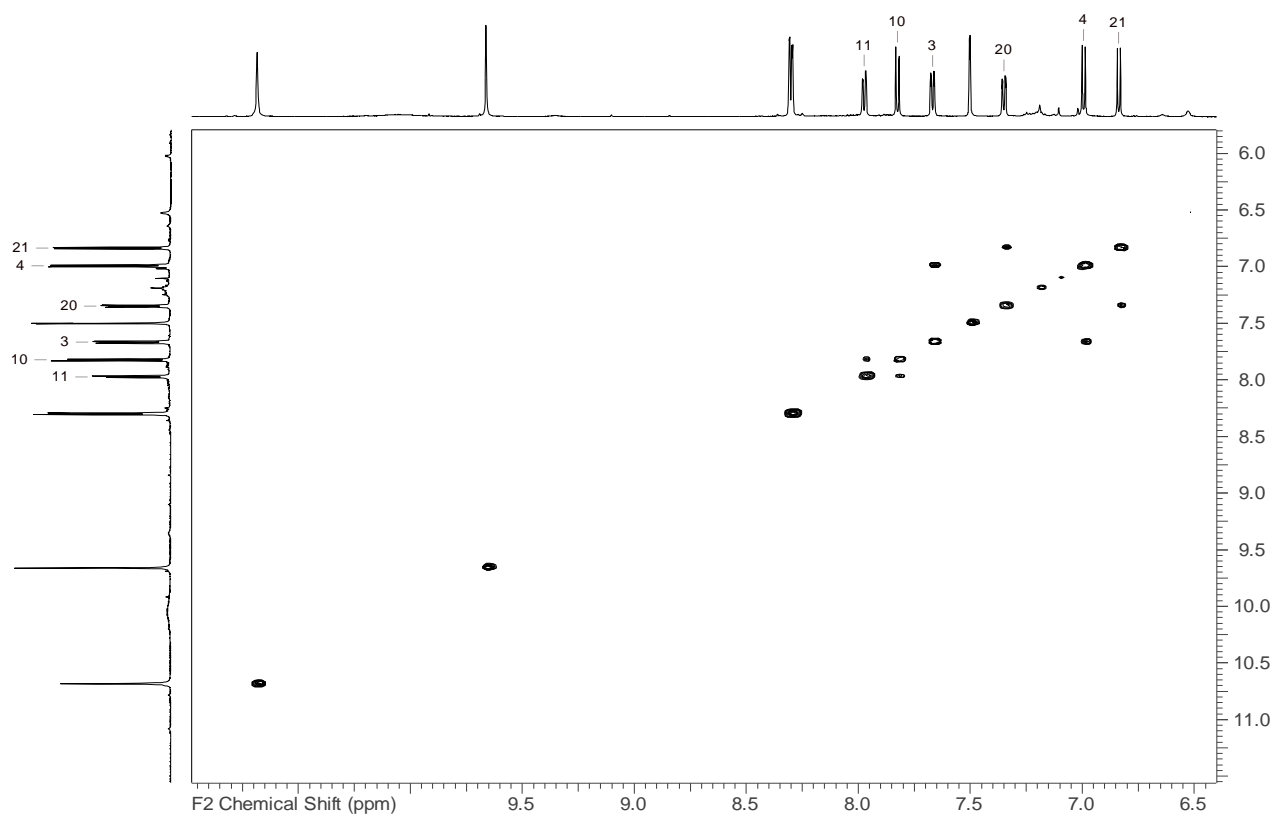

Figure S29.  $^1\text{H}$ ,  $^1\text{H}$  COSY NMR spectrum of 11.

## SUPPORTING INFORMATION

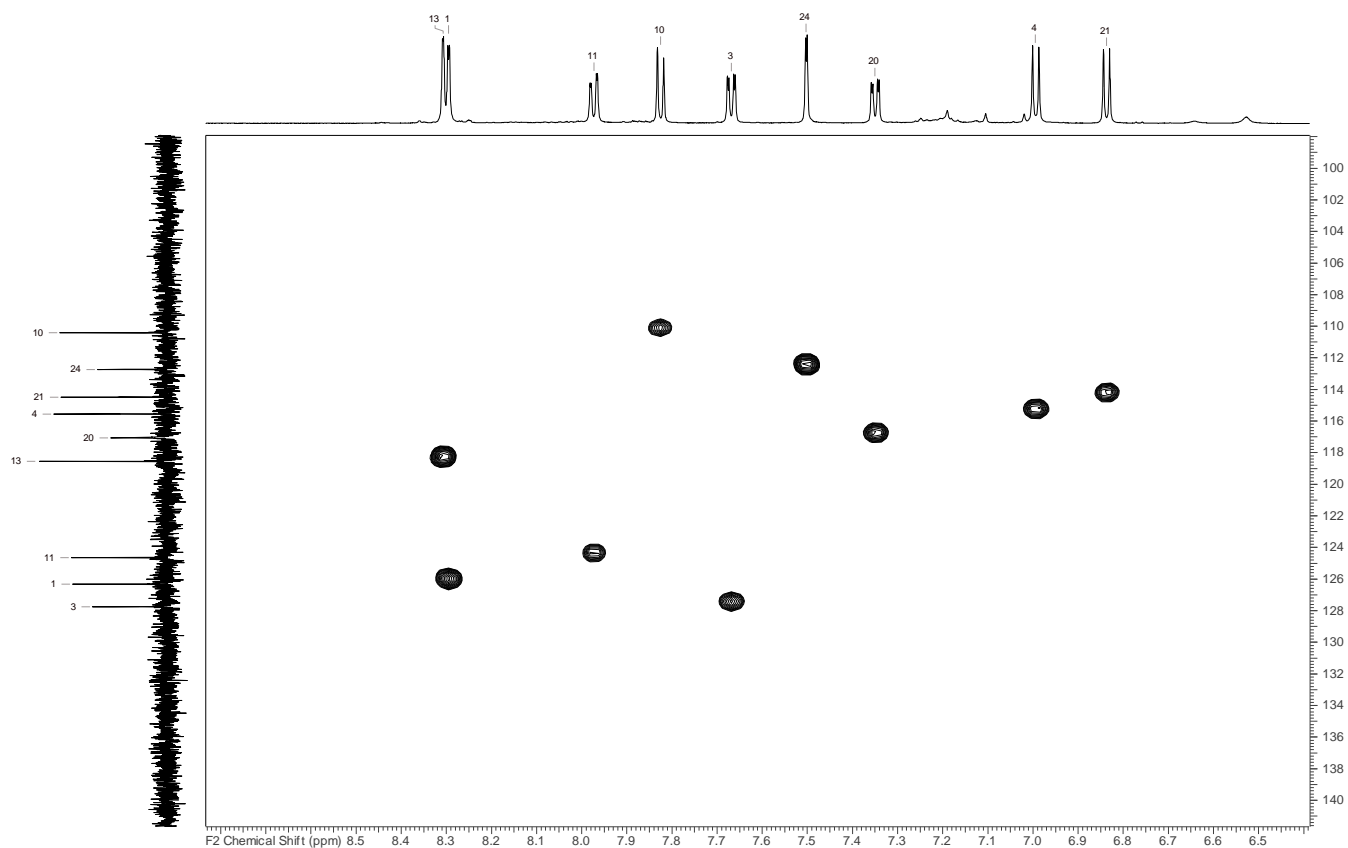Figure S30.  $^1\text{H}$ ,  $^{13}\text{C}$  HSQC NMR spectrum of 11.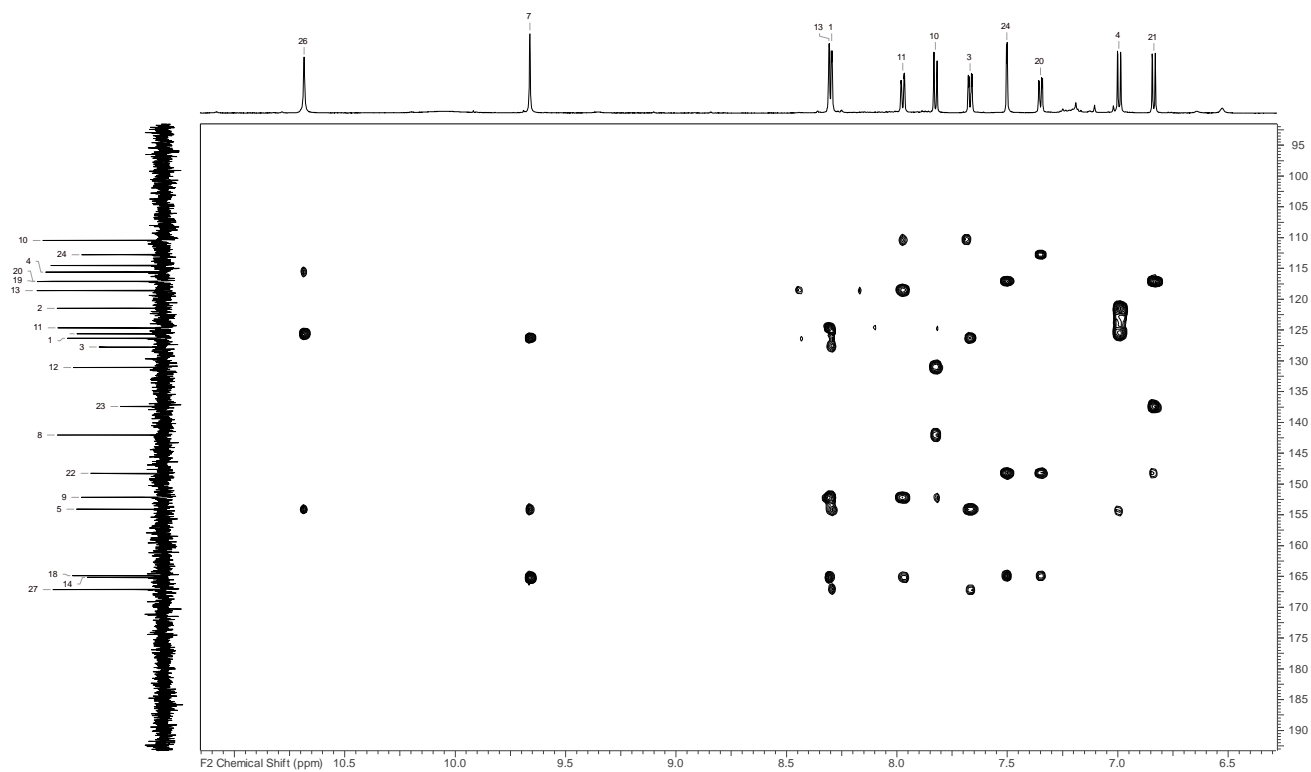Figure S31.  $^1\text{H}$ ,  $^{13}\text{C}$  HMBC NMR spectrum of 11.

## SUPPORTING INFORMATION

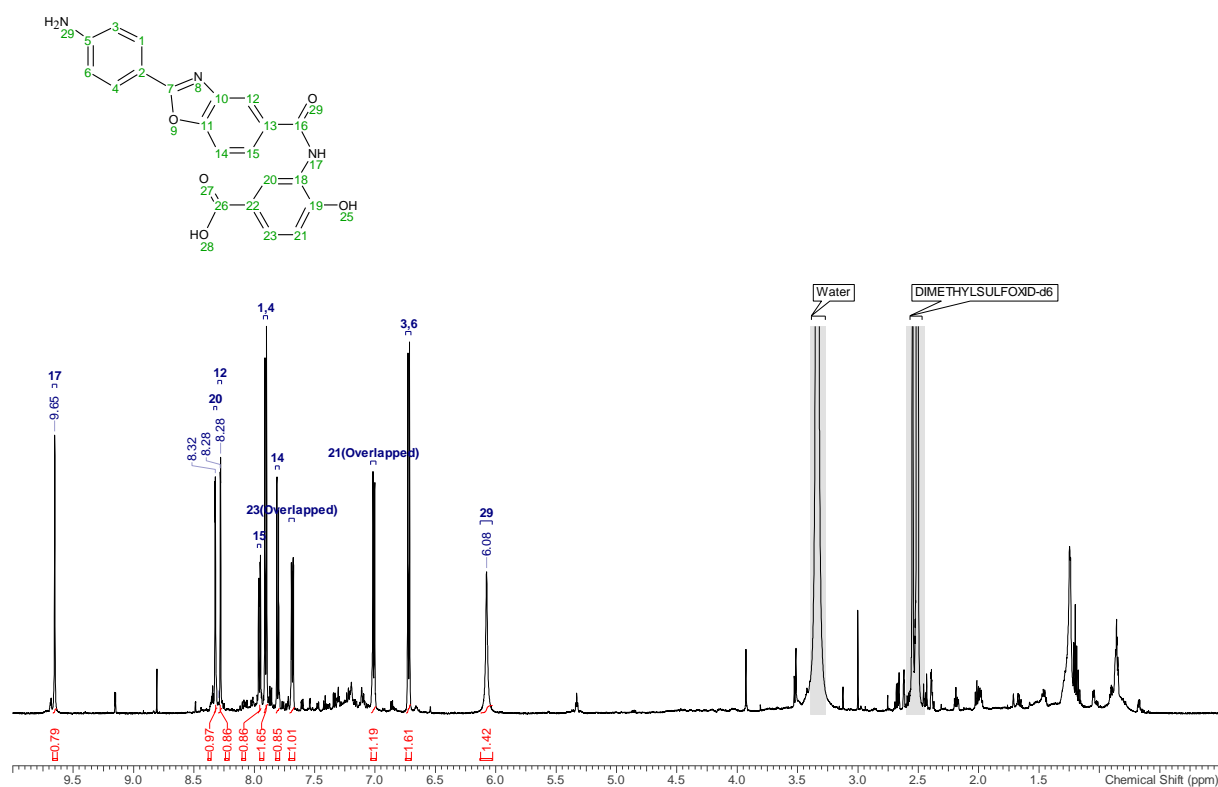

Figure S32.  $^1\text{H}$  spectrum of 12 isolated from *C. cavendishii* Rif1. Its small impurities which lead to signals in the range of  $\delta = 0.8\text{--}4.0$  ppm.

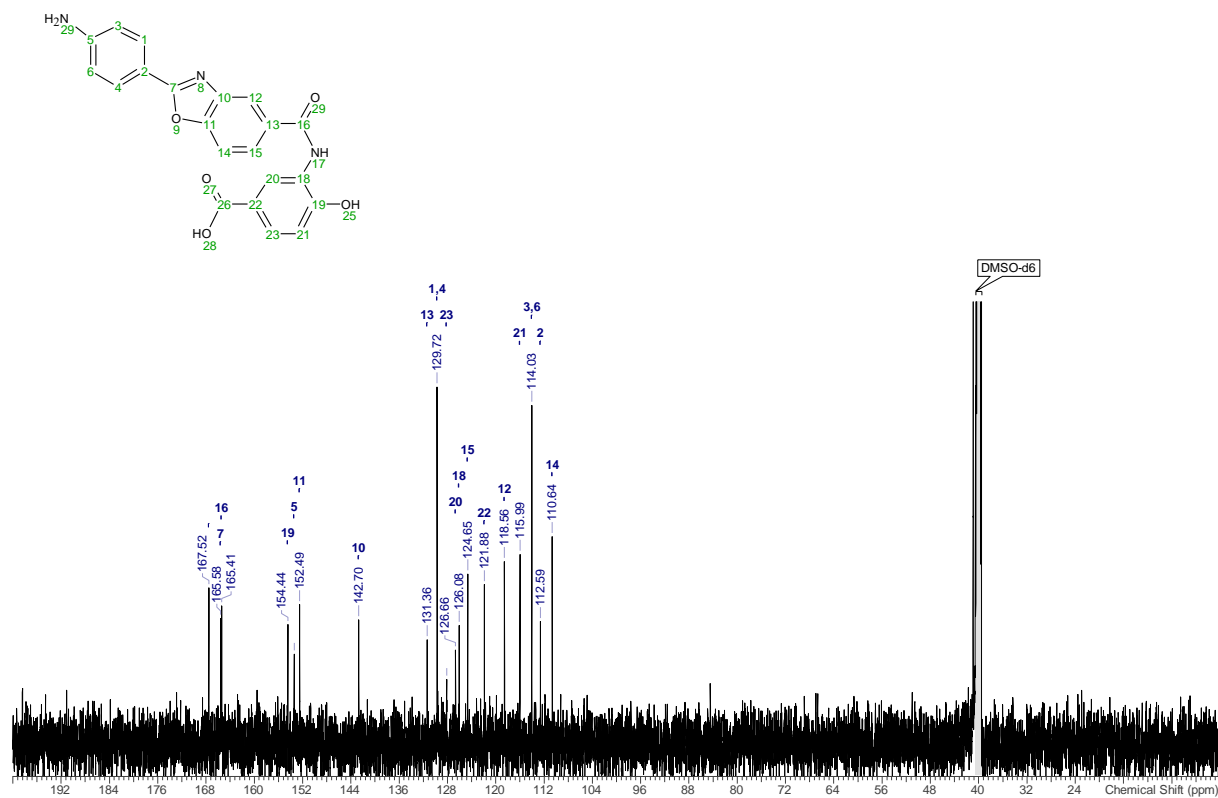

Figure S33.  $^{13}\text{C}$  spectrum of 12.

## SUPPORTING INFORMATION

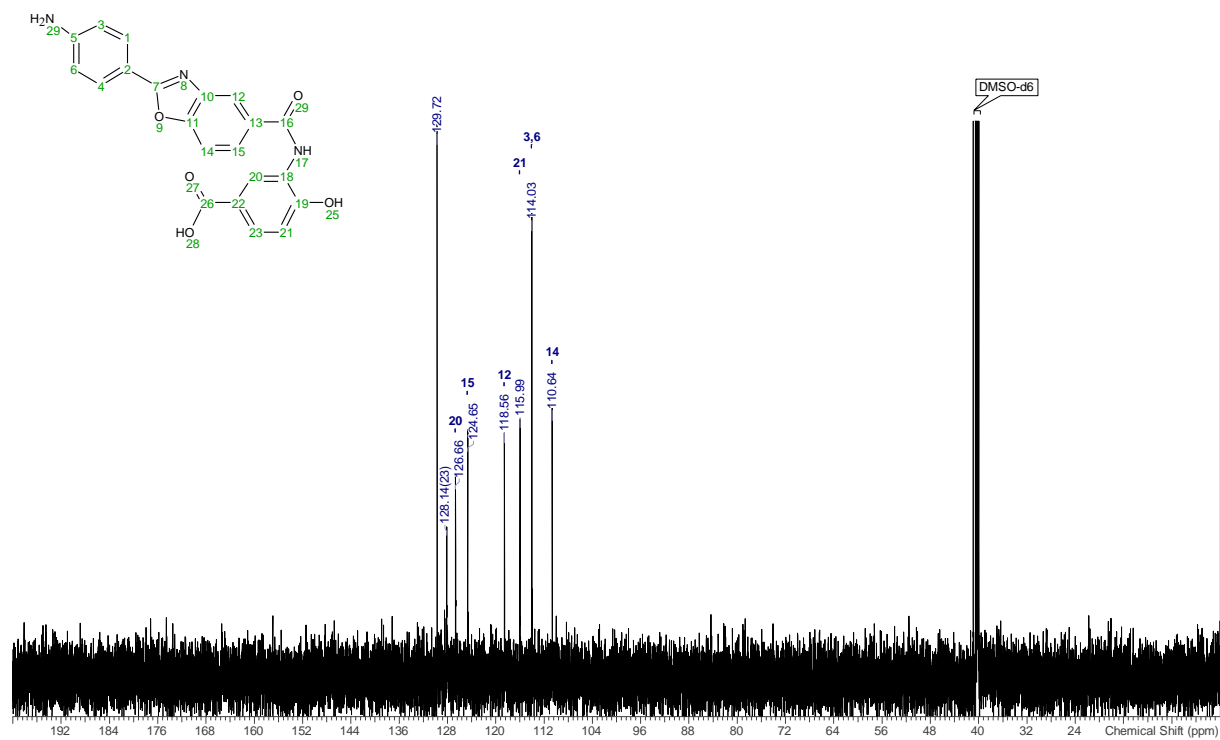Figure S34. DEPT-135 NMR spectrum of **12**.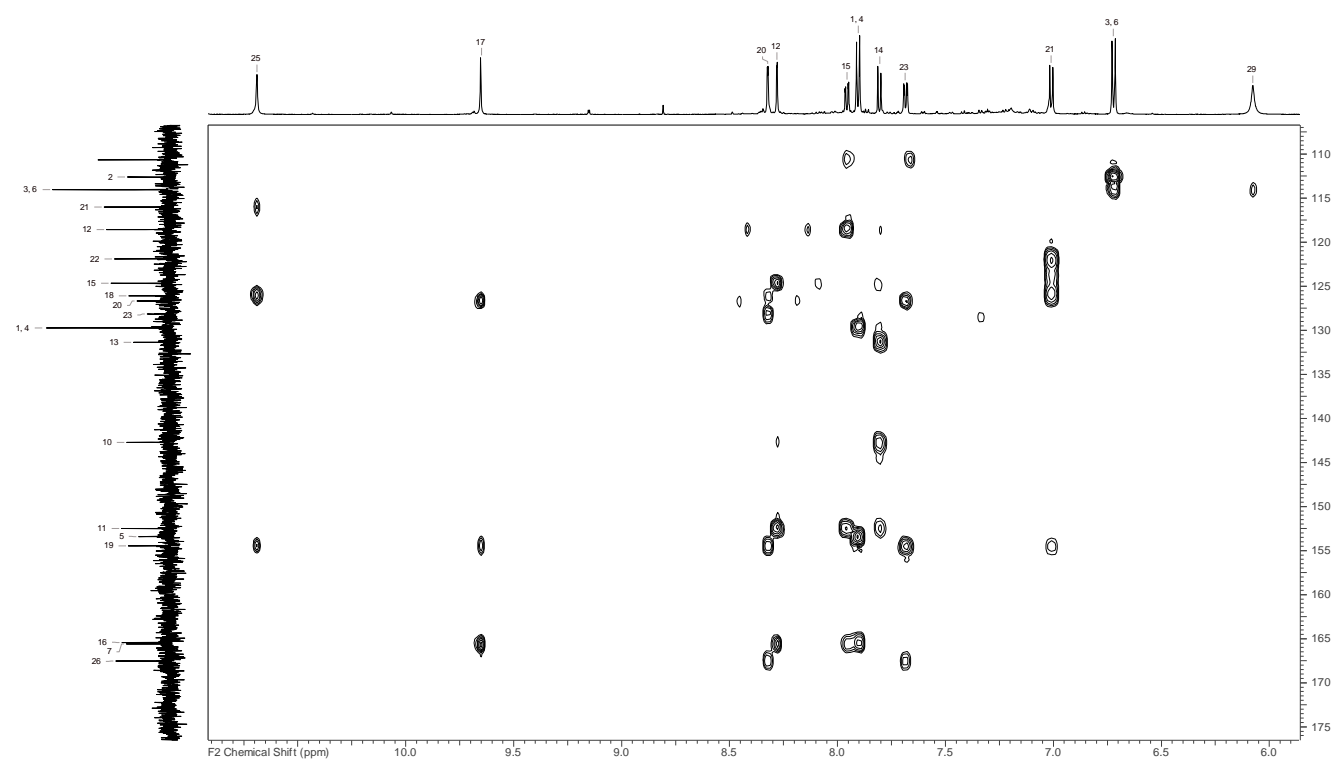Figure S35. <sup>1</sup>H-<sup>13</sup>C HMBC NMR spectrum of **12**.

## SUPPORTING INFORMATION

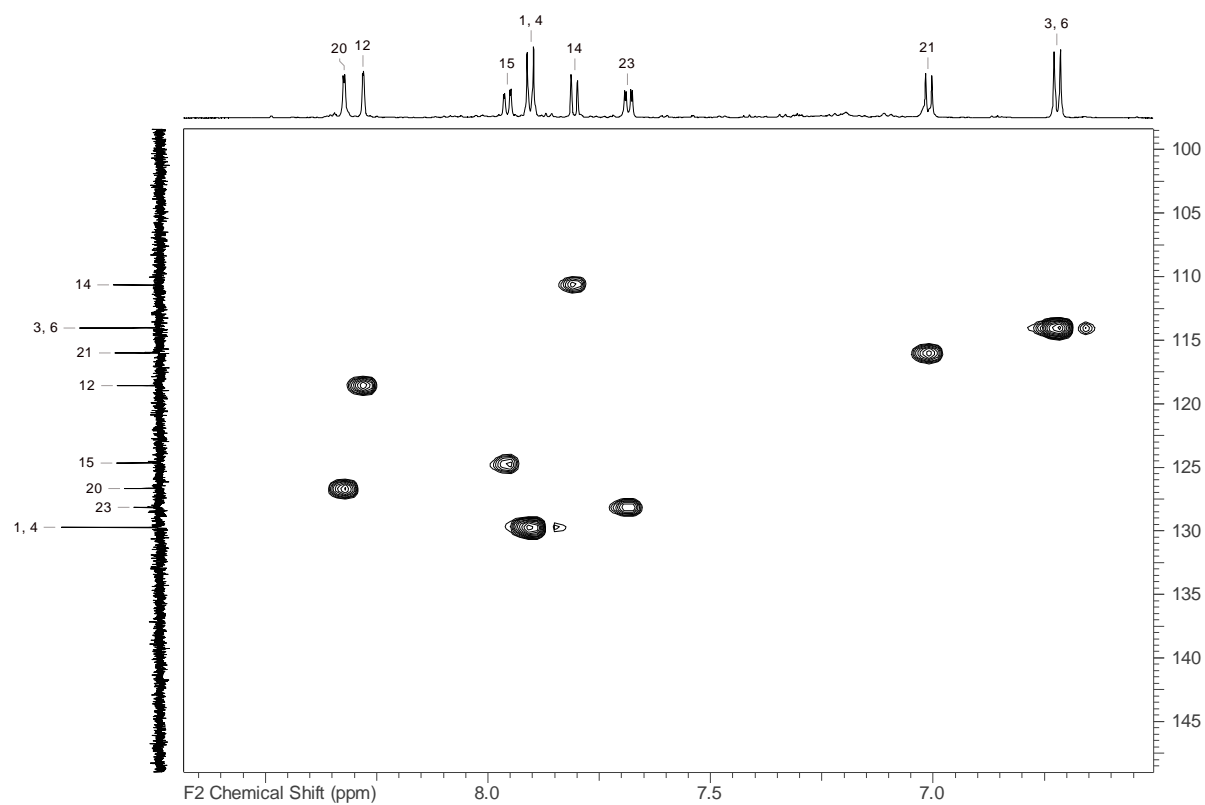

Figure S36.  $^1\text{H}$ - $^{13}\text{C}$  HSQC NMR spectrum of **12**.

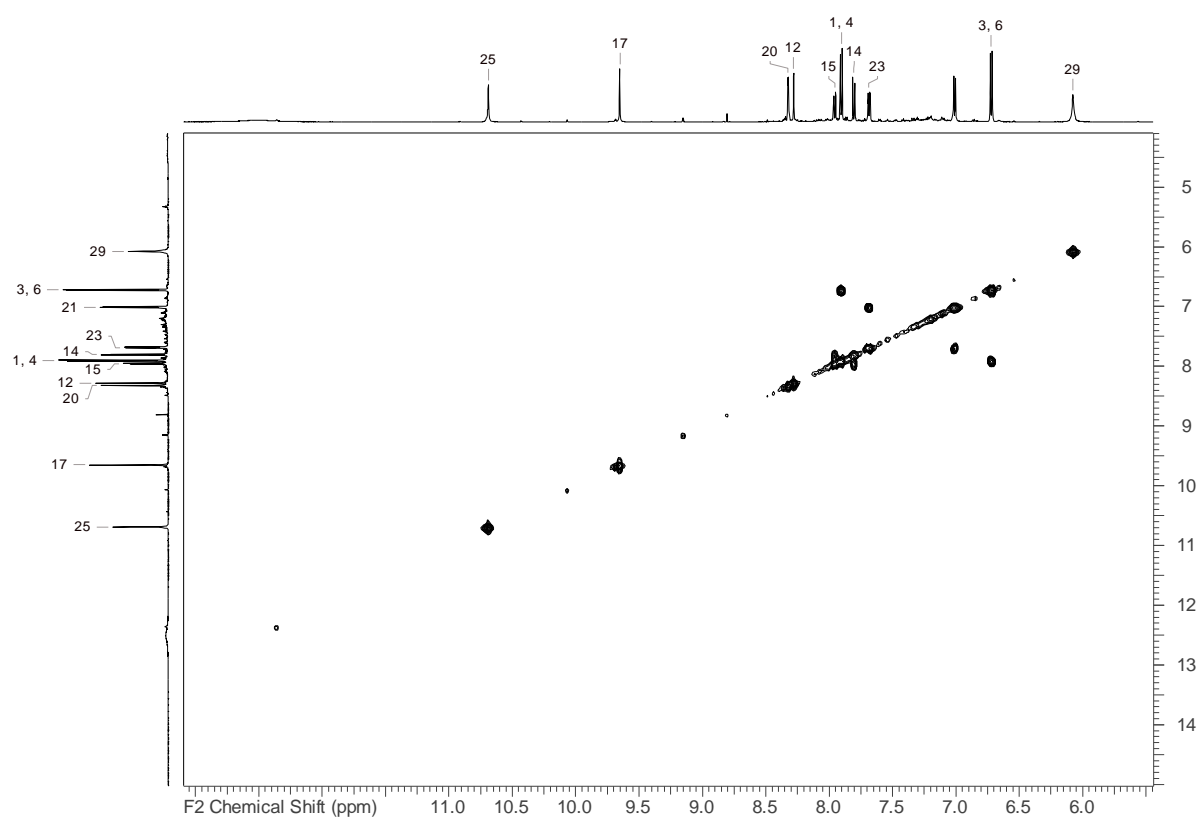

Figure S37.  $^1\text{H}$ ,  $^1\text{H}$  COSY NMR spectrum of **12**.

## SUPPORTING INFORMATION

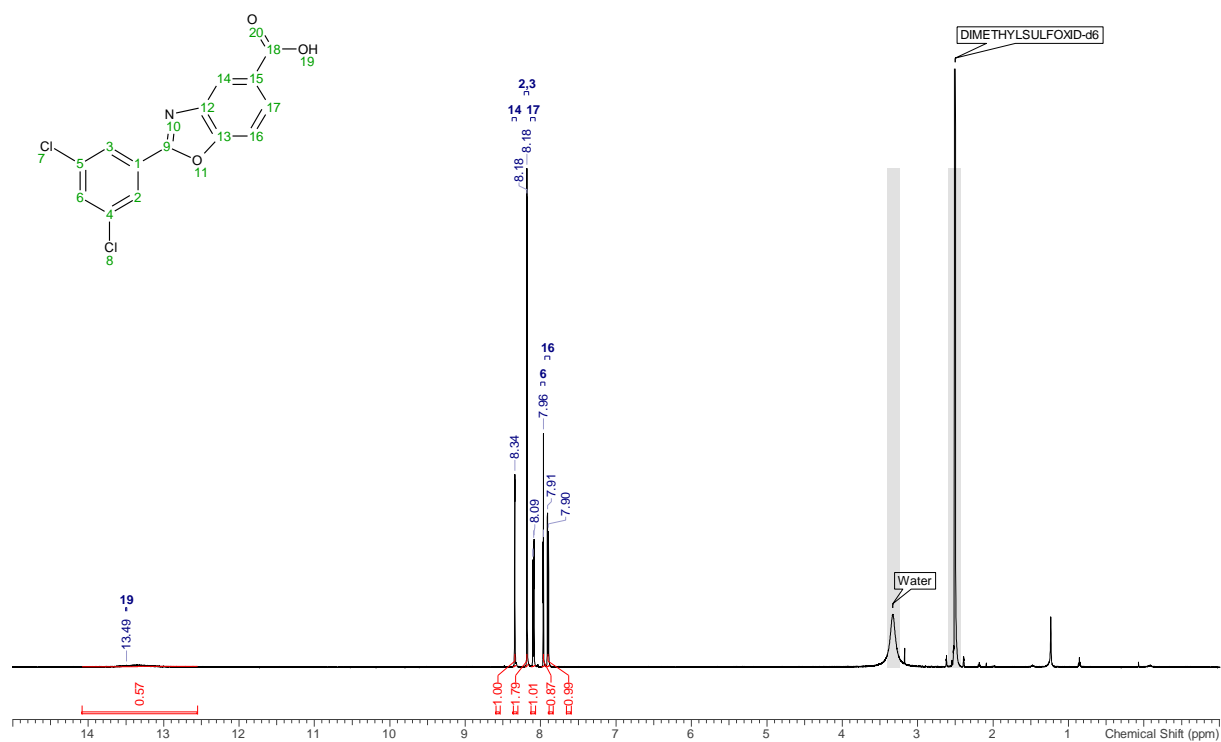Figure S38.  $^1\text{H}$  NMR spectrum of **25**.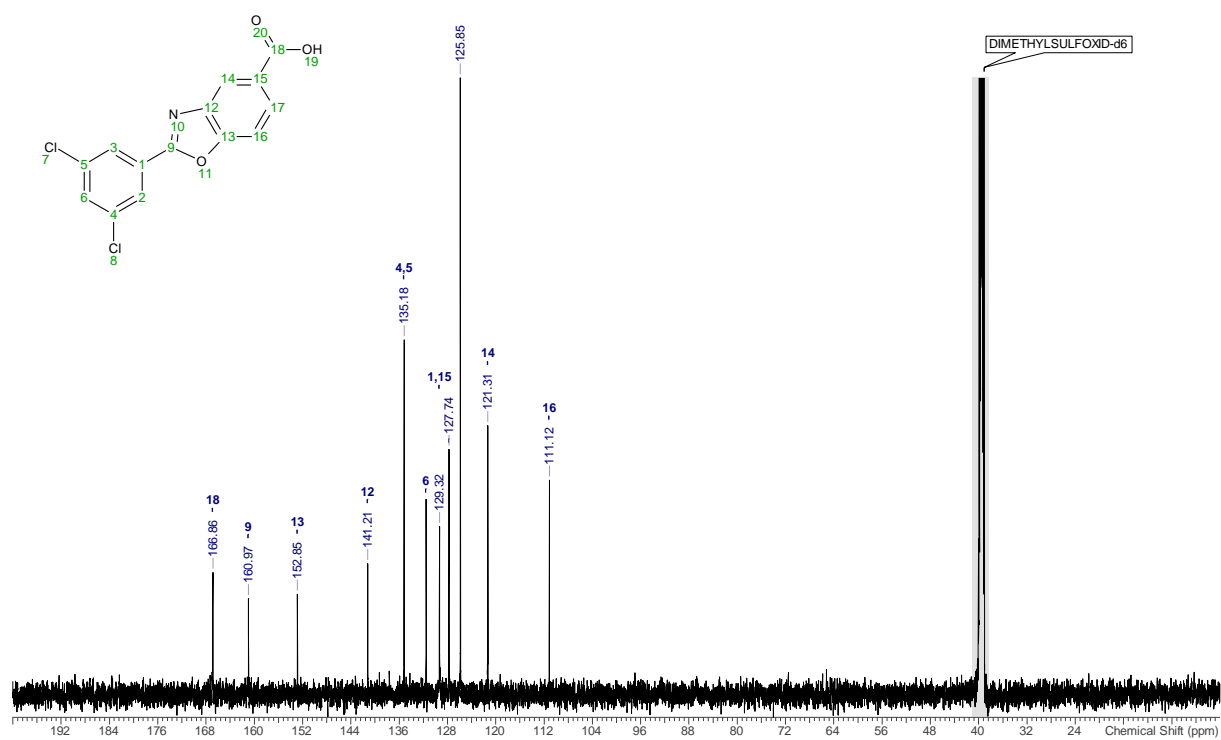Figure S39.  $^{13}\text{C}$  NMR spectrum of **25**.

## SUPPORTING INFORMATION

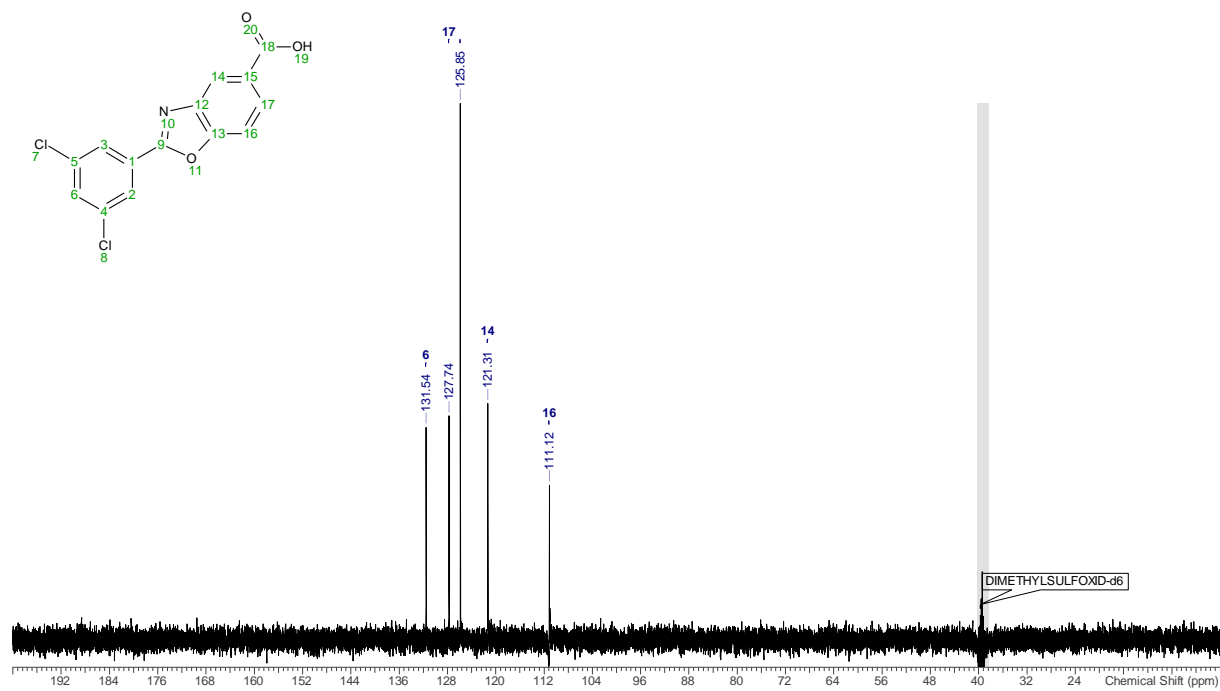

Figure S40. DEPT-135 NMR spectrum of **25**.



## SUPPORTING INFORMATION

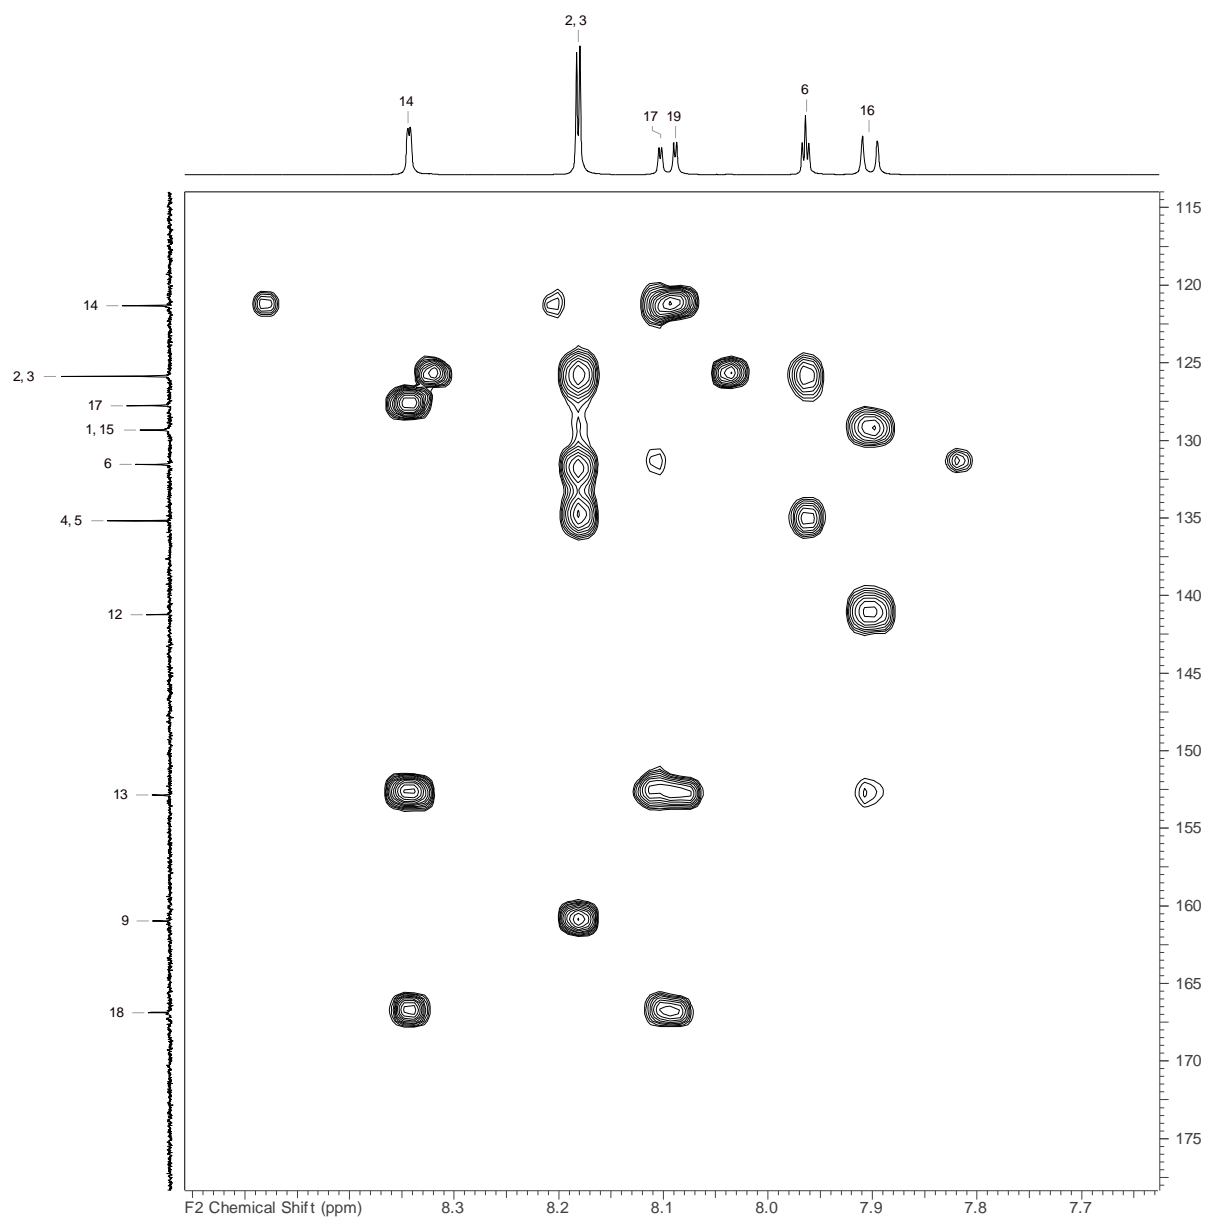

Figure S41.  $^1\text{H}$ - $^{13}\text{C}$  HMBC NMR spectrum of **25**.

## SUPPORTING INFORMATION

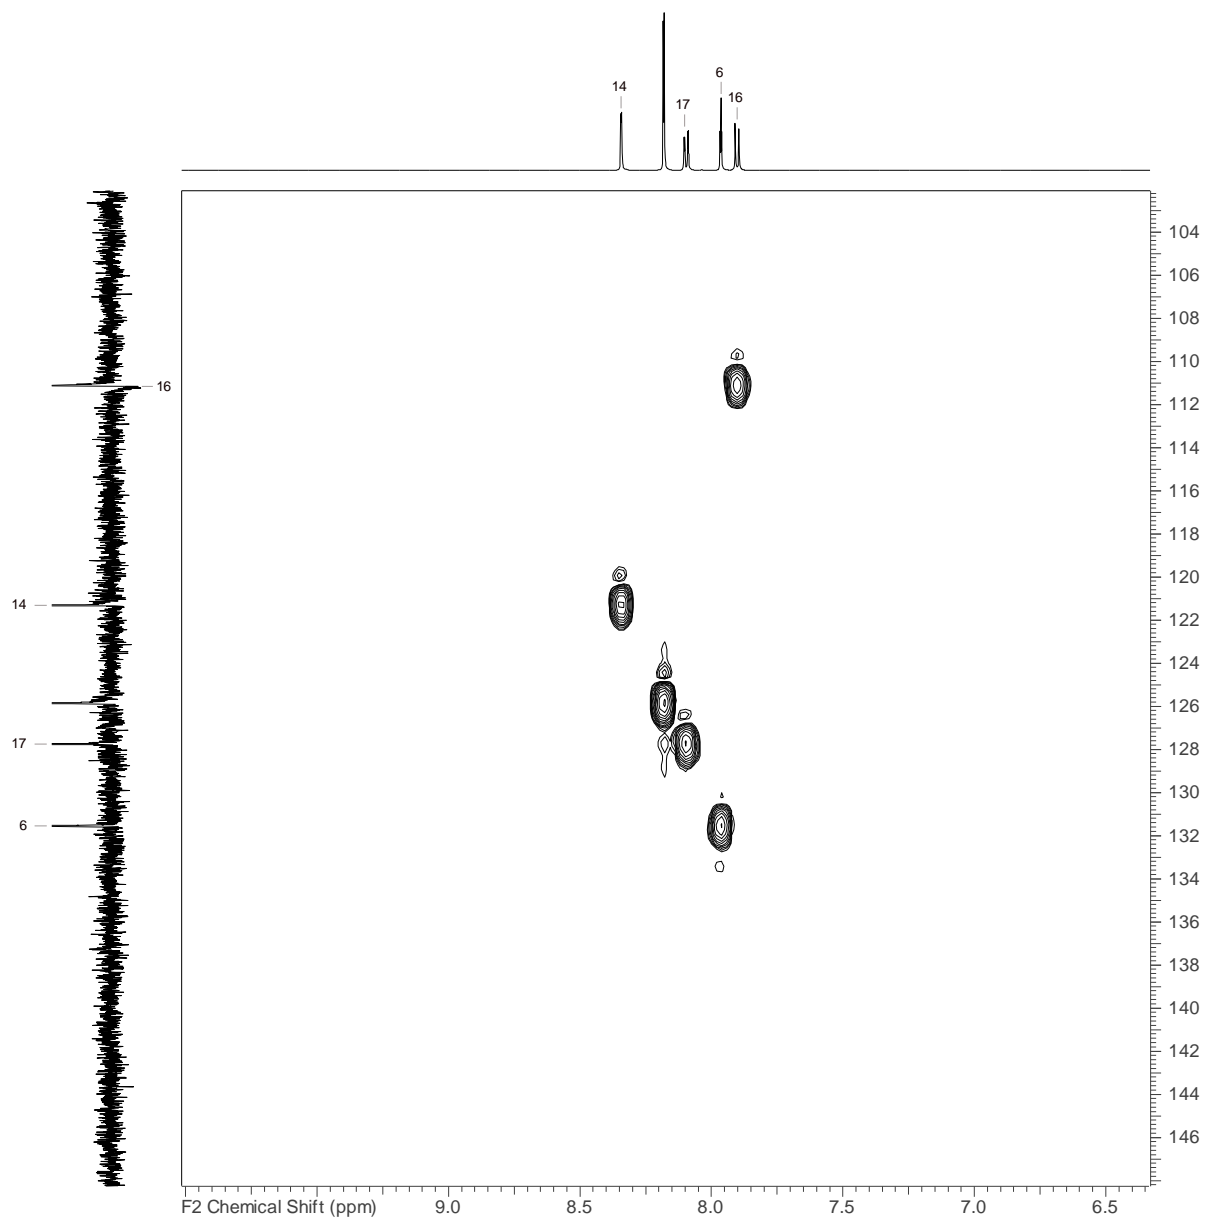

Figure S42.  $^1\text{H}$ - $^{13}\text{C}$  HSQC NMR spectrum of **25**.

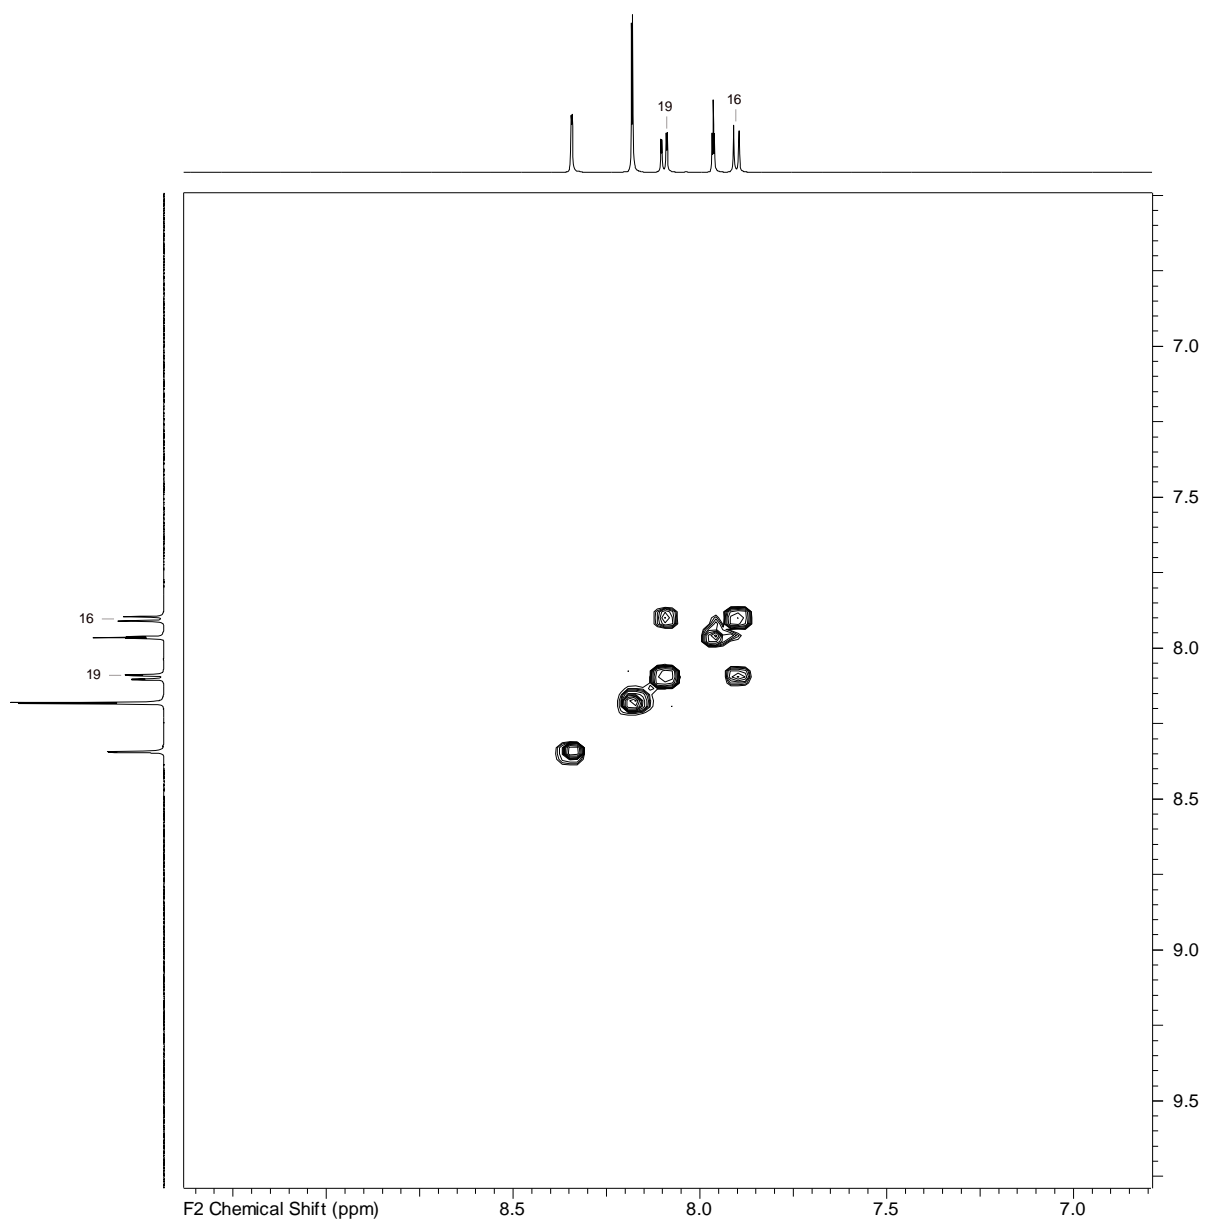

Figure S43.  $^1\text{H}$ ,  $^1\text{H}$  COSY NMR spectrum of **25**.

## SUPPORTING INFORMATION

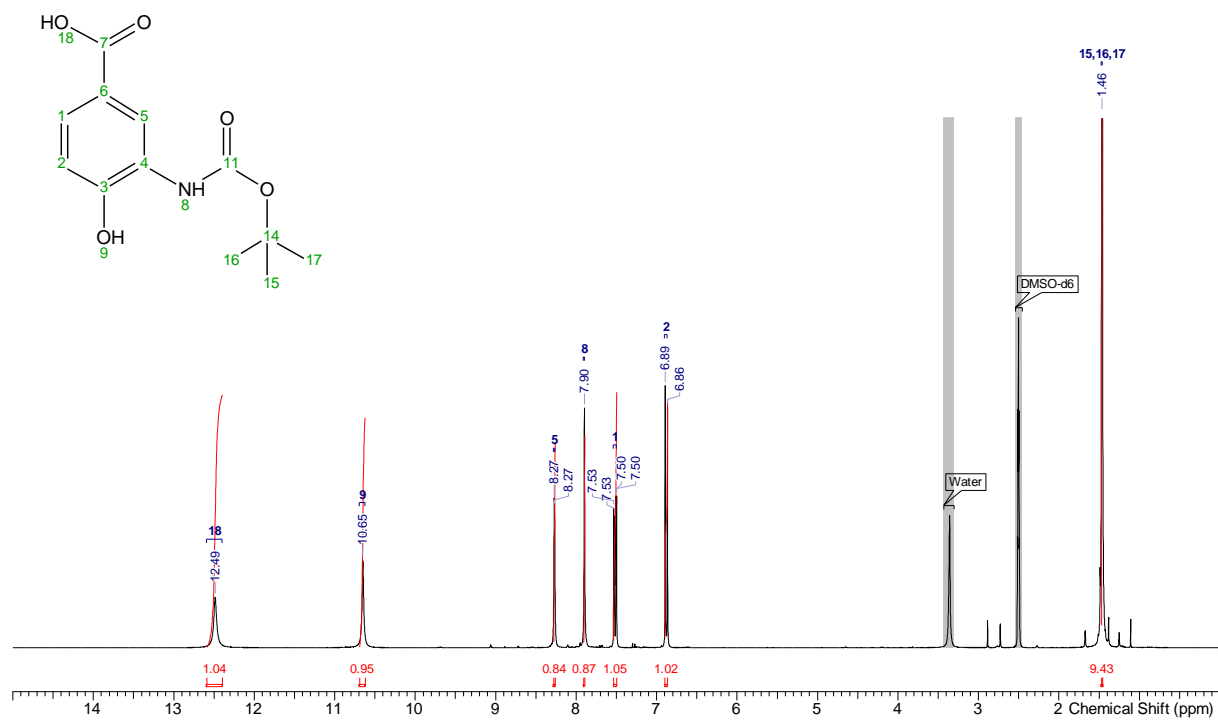

**Figure S44.**  $^1\text{H}$  NMR spectrum of **15**.

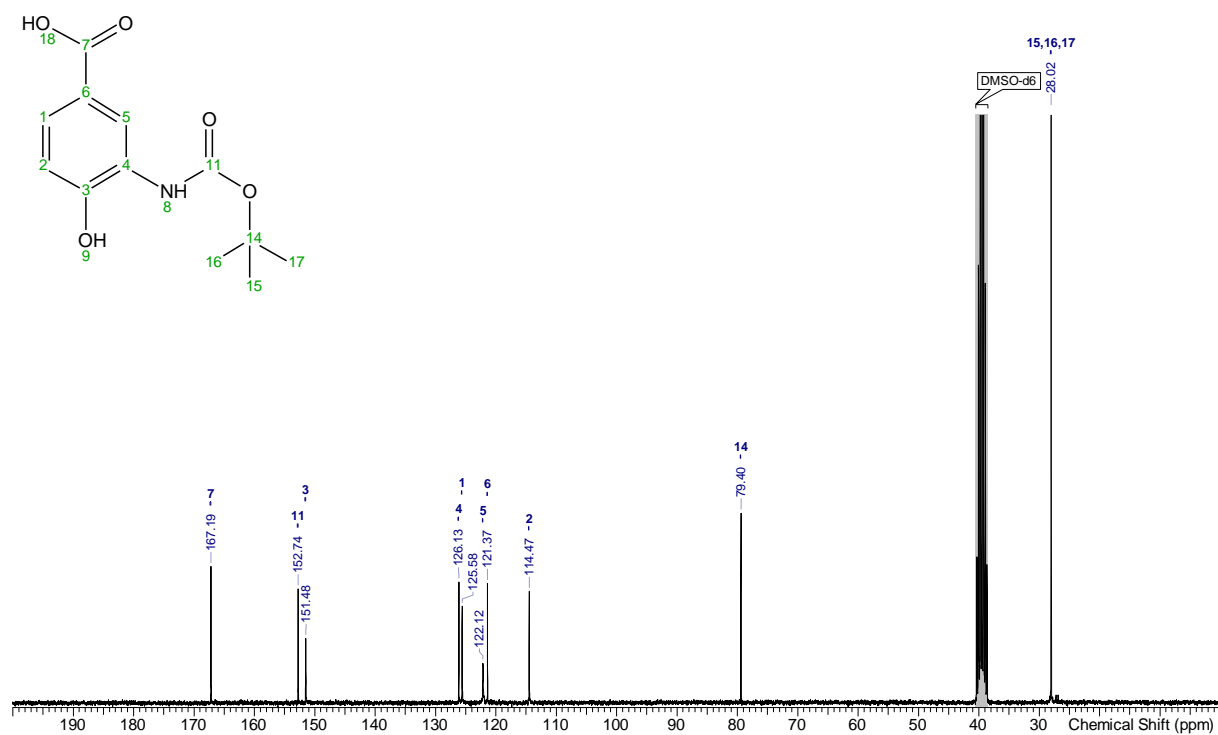

**Figure S45.**  $^{13}\text{C}$  NMR spectrum of **15**.

## SUPPORTING INFORMATION

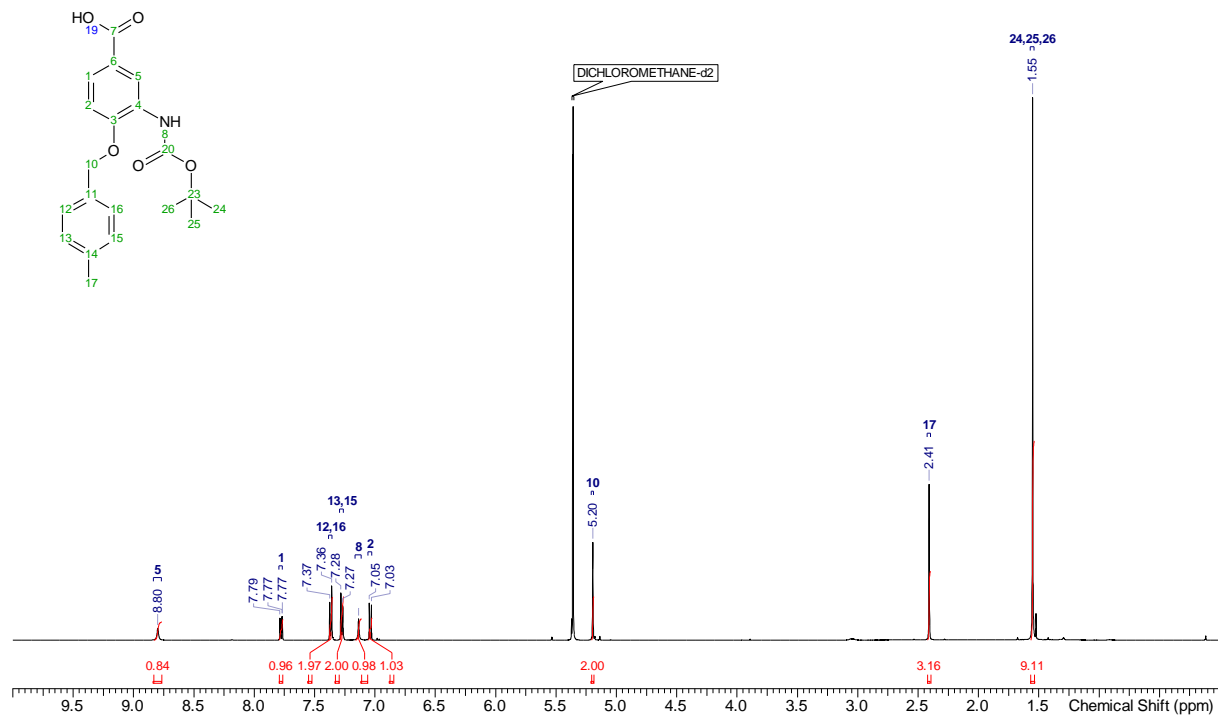

**Figure S46.**  $^1\text{H}$  NMR spectrum of **16**.

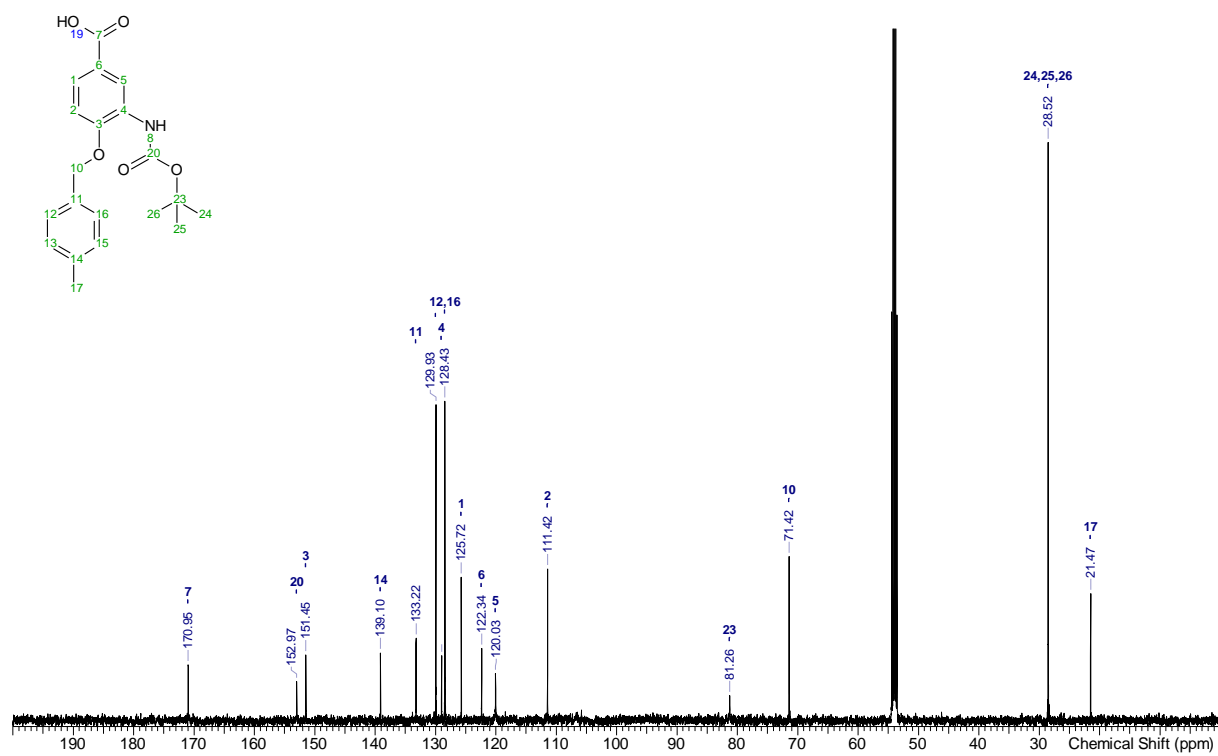

**Figure S47.**  $^{13}\text{C}$  NMR spectrum of **16**.

## SUPPORTING INFORMATION

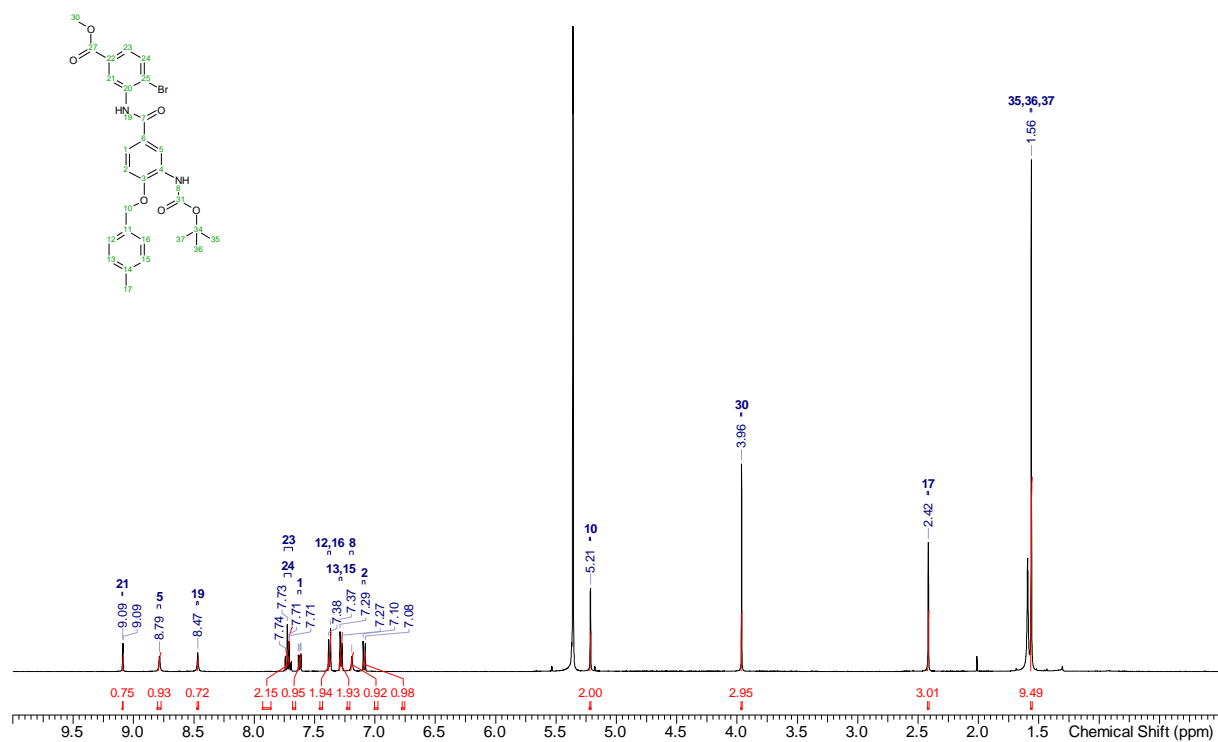

**Figure S 48.**  $^1\text{H}$  NMR spectrum of **19**.

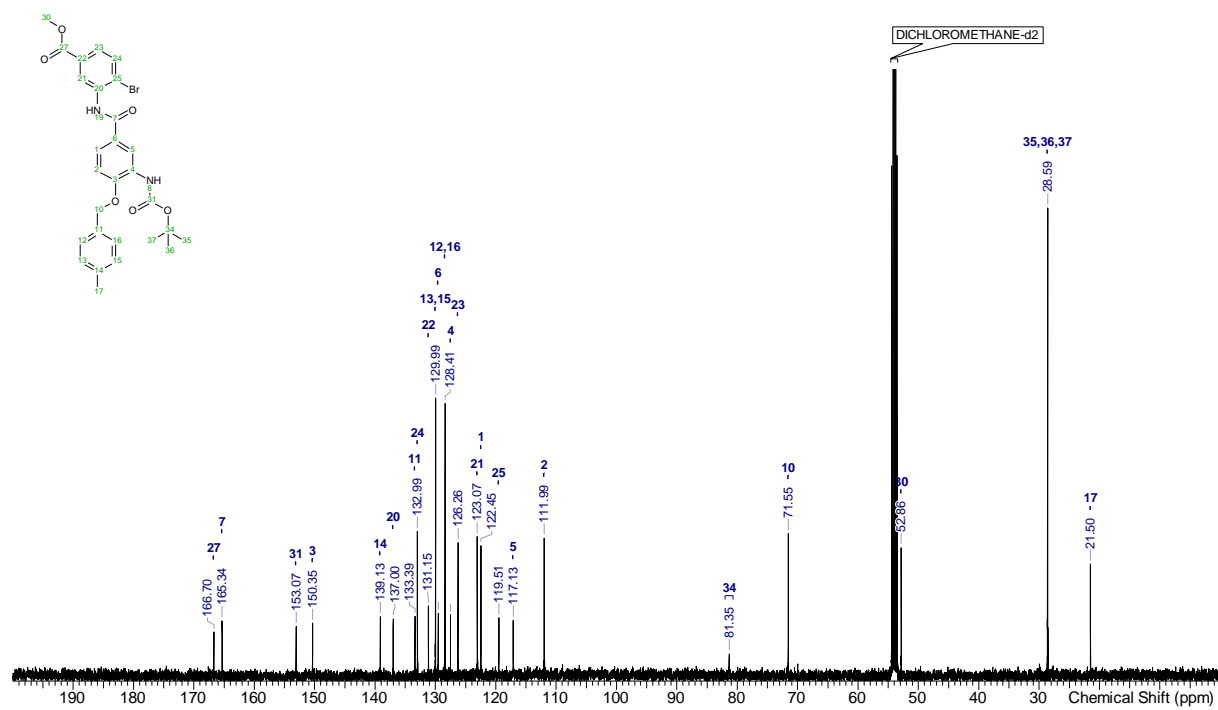

**Figure S 49.**  $^{13}\text{C}$  NMR spectrum of **19**.

## SUPPORTING INFORMATION

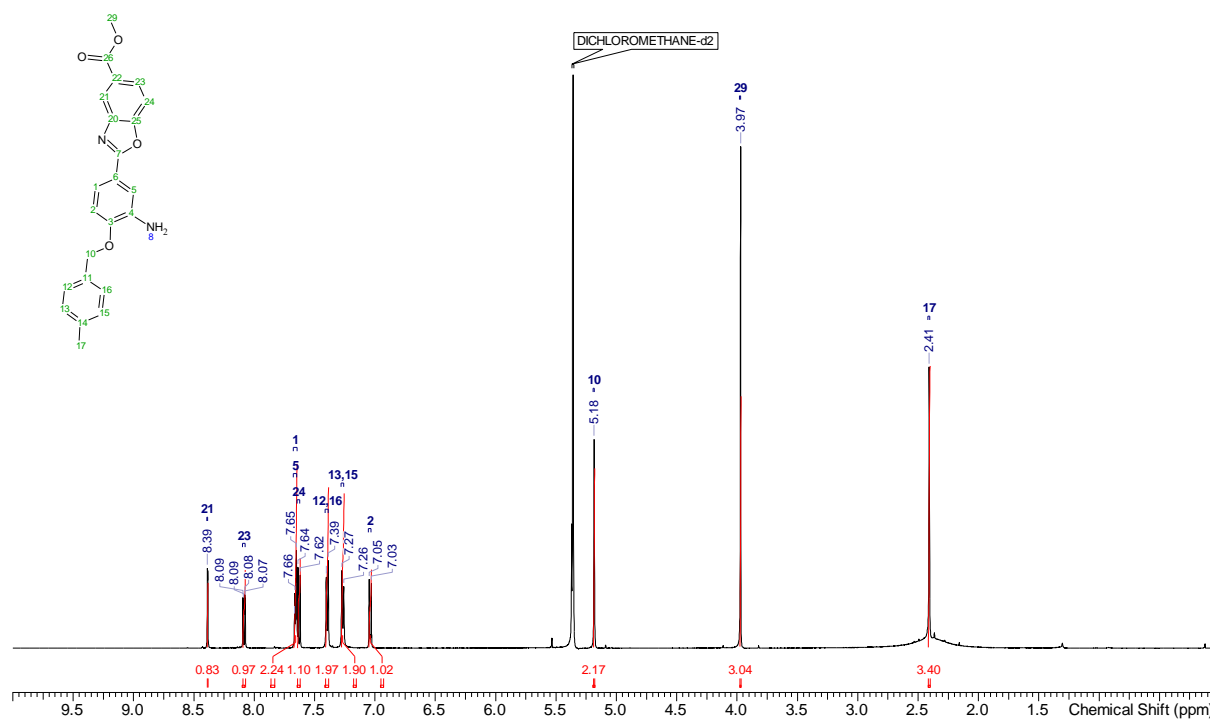

Figure S 50. <sup>1</sup>H NMR spectrum of 20.

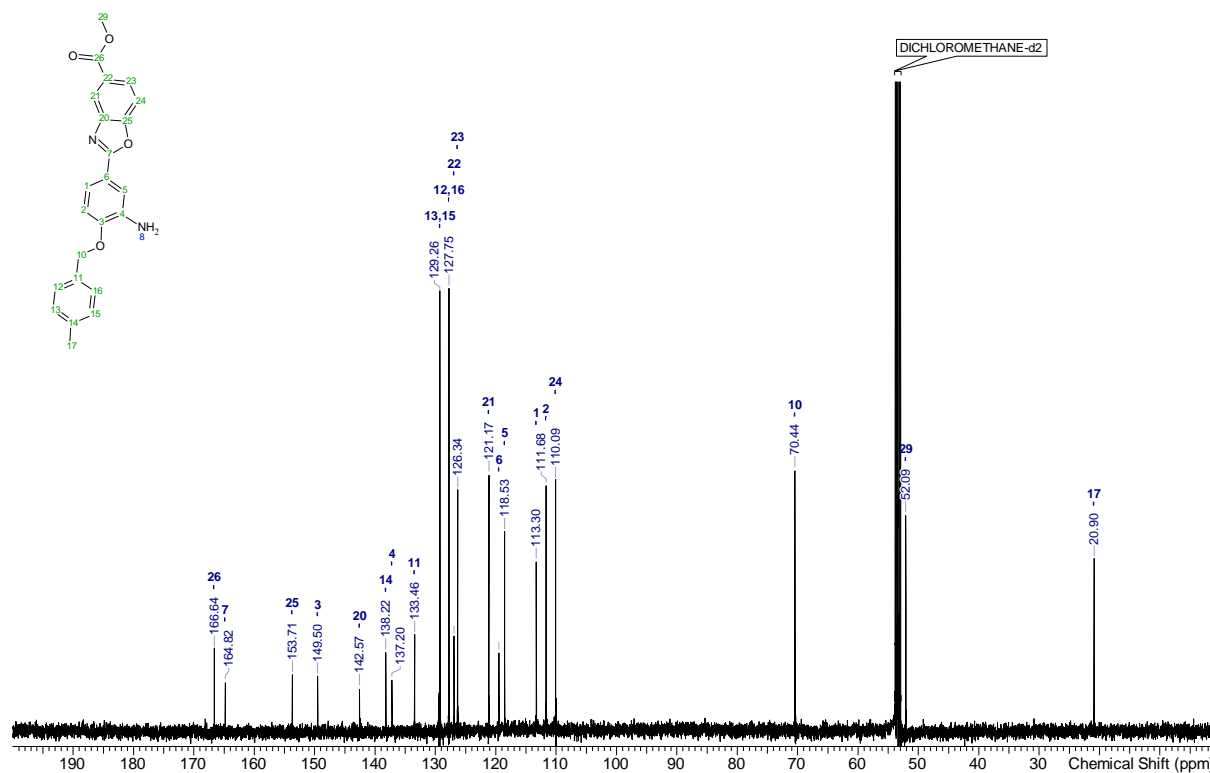

Figure S 51. <sup>13</sup>C NMR spectrum of 20.

## SUPPORTING INFORMATION

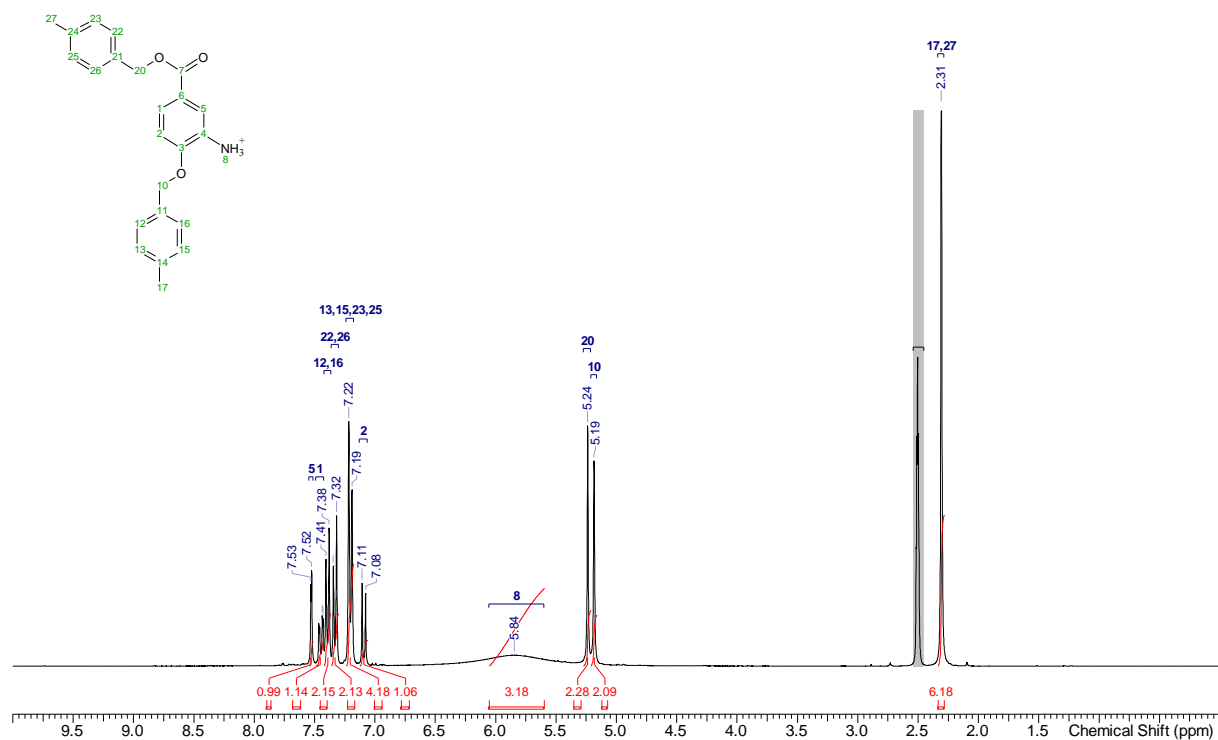

**Figure S52.**  $^1\text{H}$  NMR spectrum of 17.

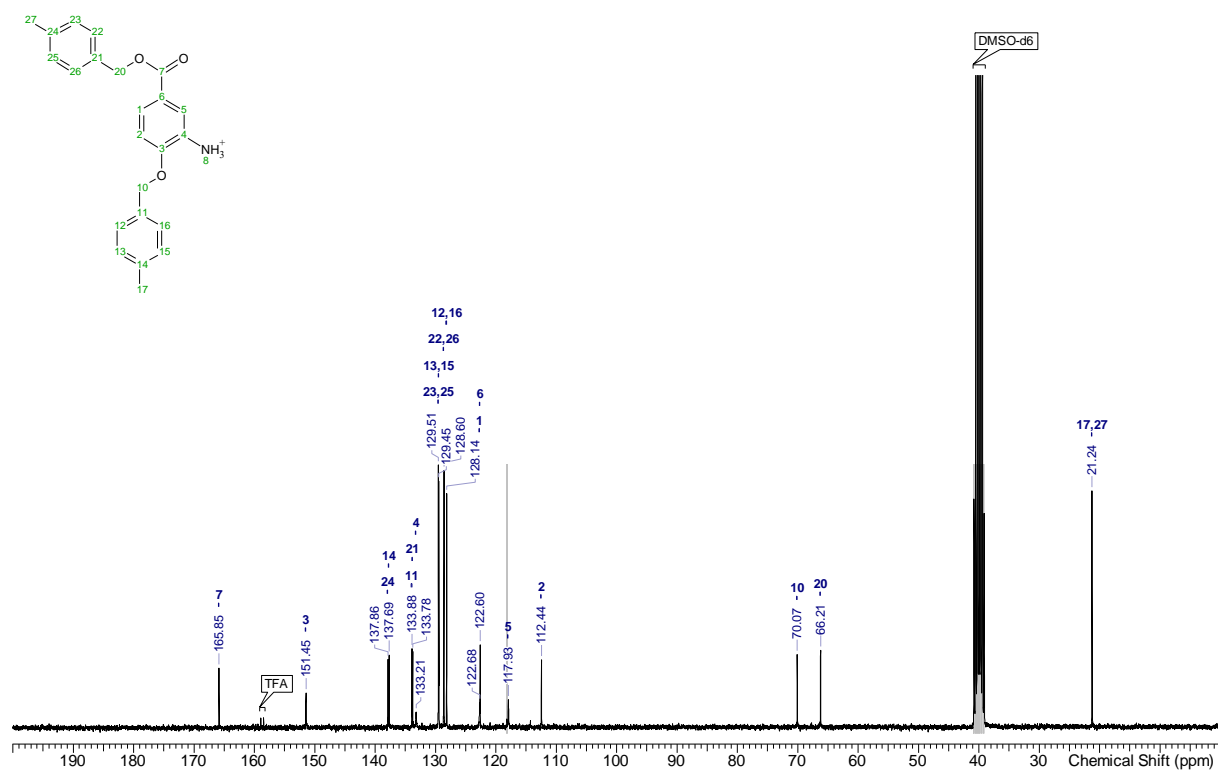

**Figure S53.**  $^{13}\text{C}$  NMR spectrum of 17.



## SUPPORTING INFORMATION

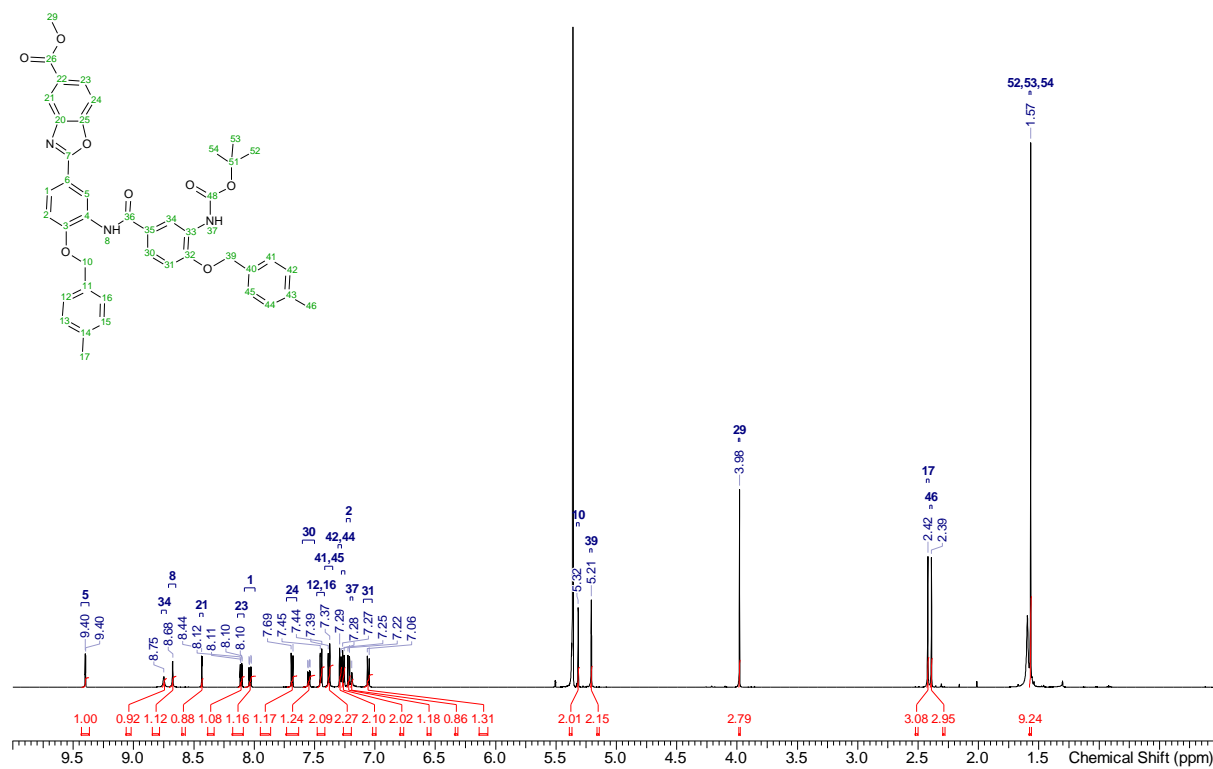Figure S54. <sup>1</sup>H NMR spectrum of 26.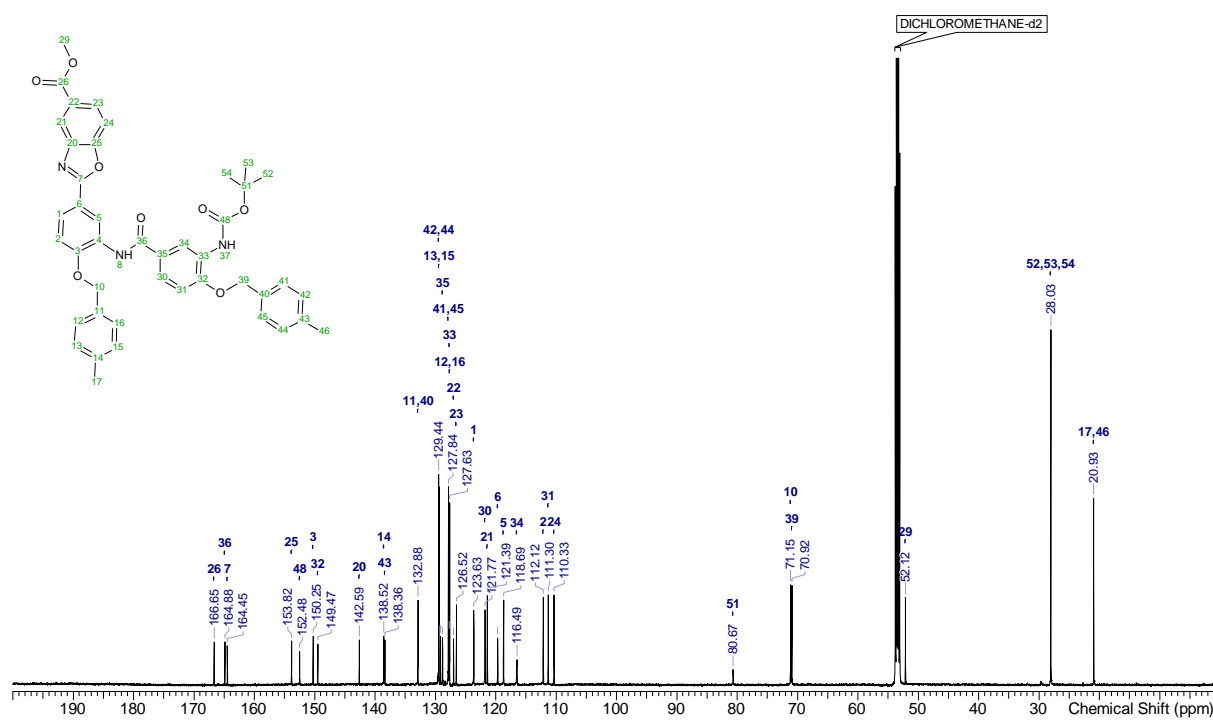Figure S55. <sup>13</sup>C NMR spectrum of 26.



## SUPPORTING INFORMATION

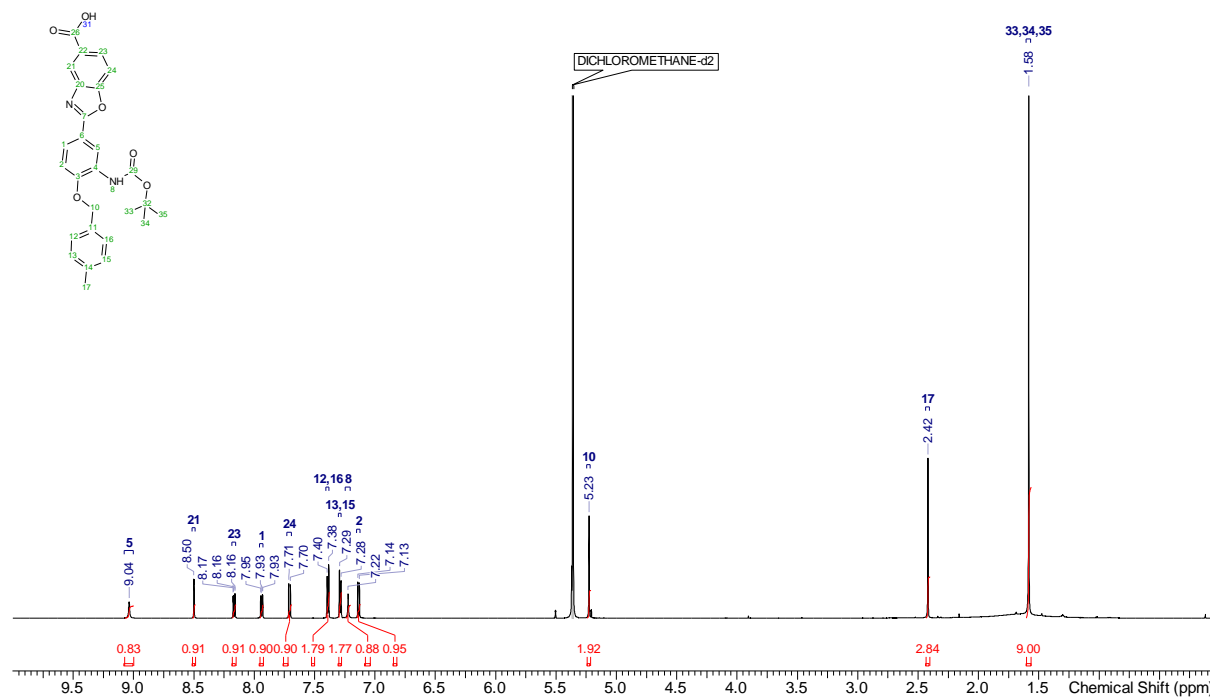Figure S58. <sup>1</sup>H NMR spectrum of 27.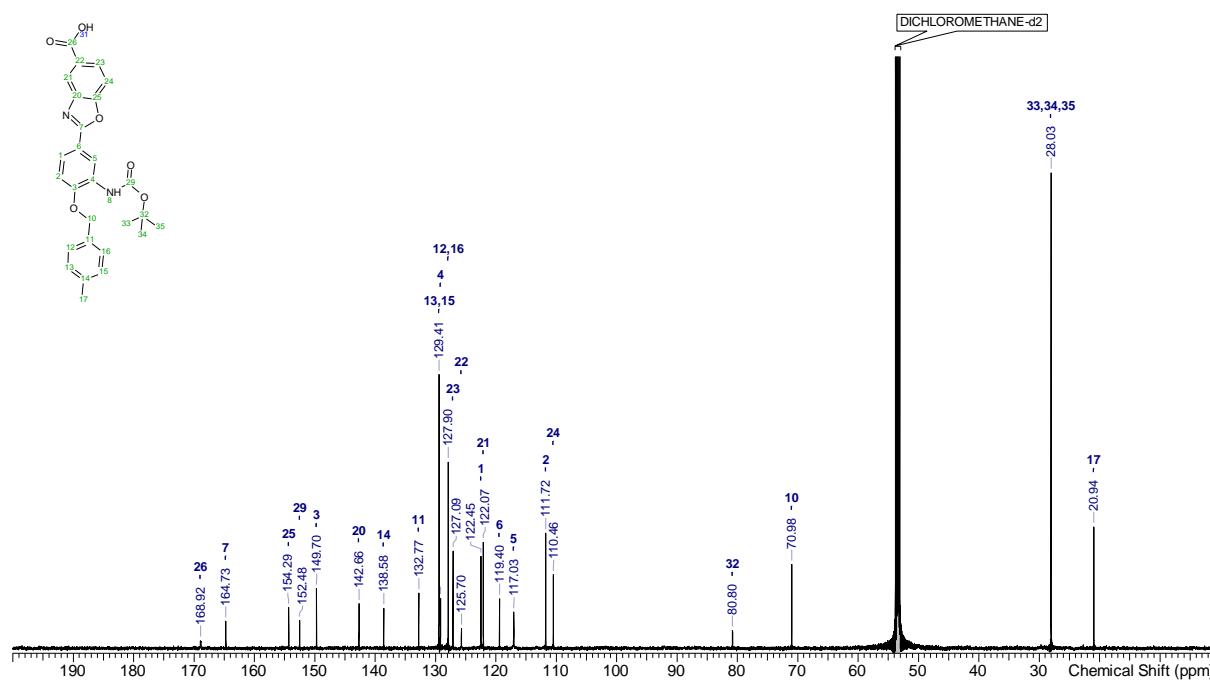Figure S59. <sup>13</sup>C NMR spectrum of 27.

## SUPPORTING INFORMATION

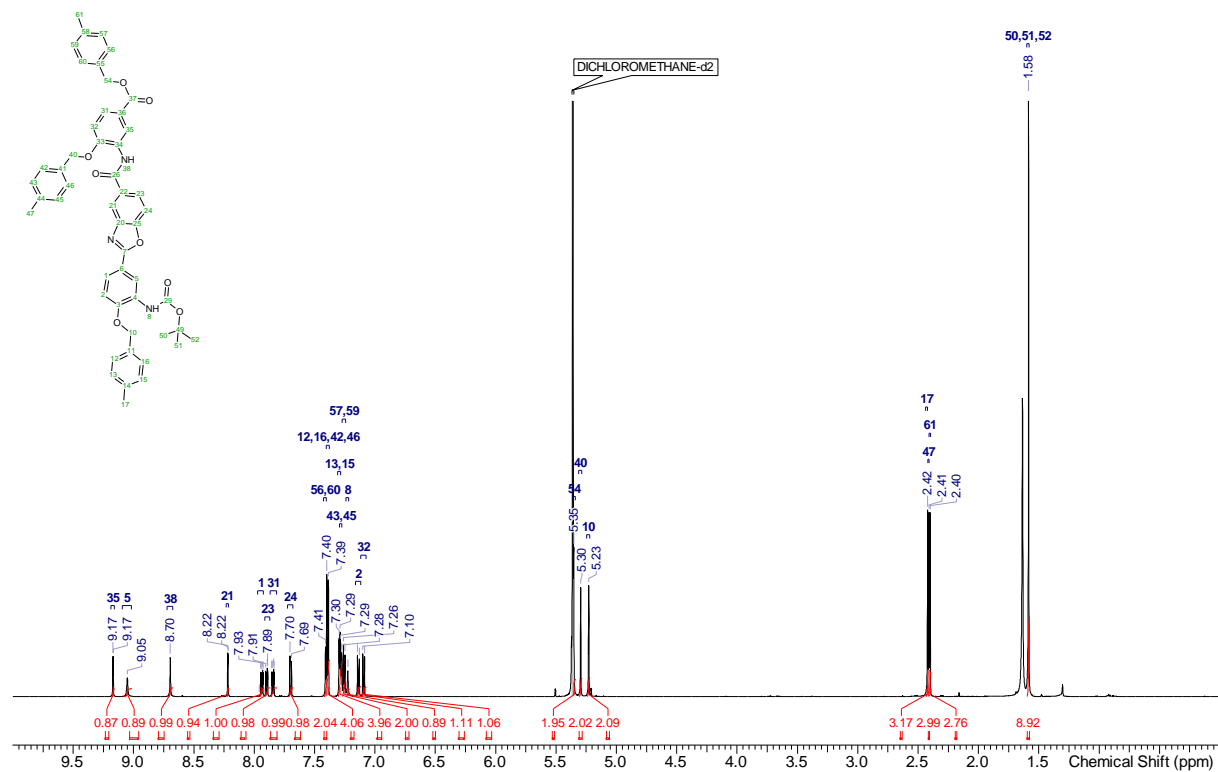Figure S60. <sup>1</sup>H NMR spectrum of 21.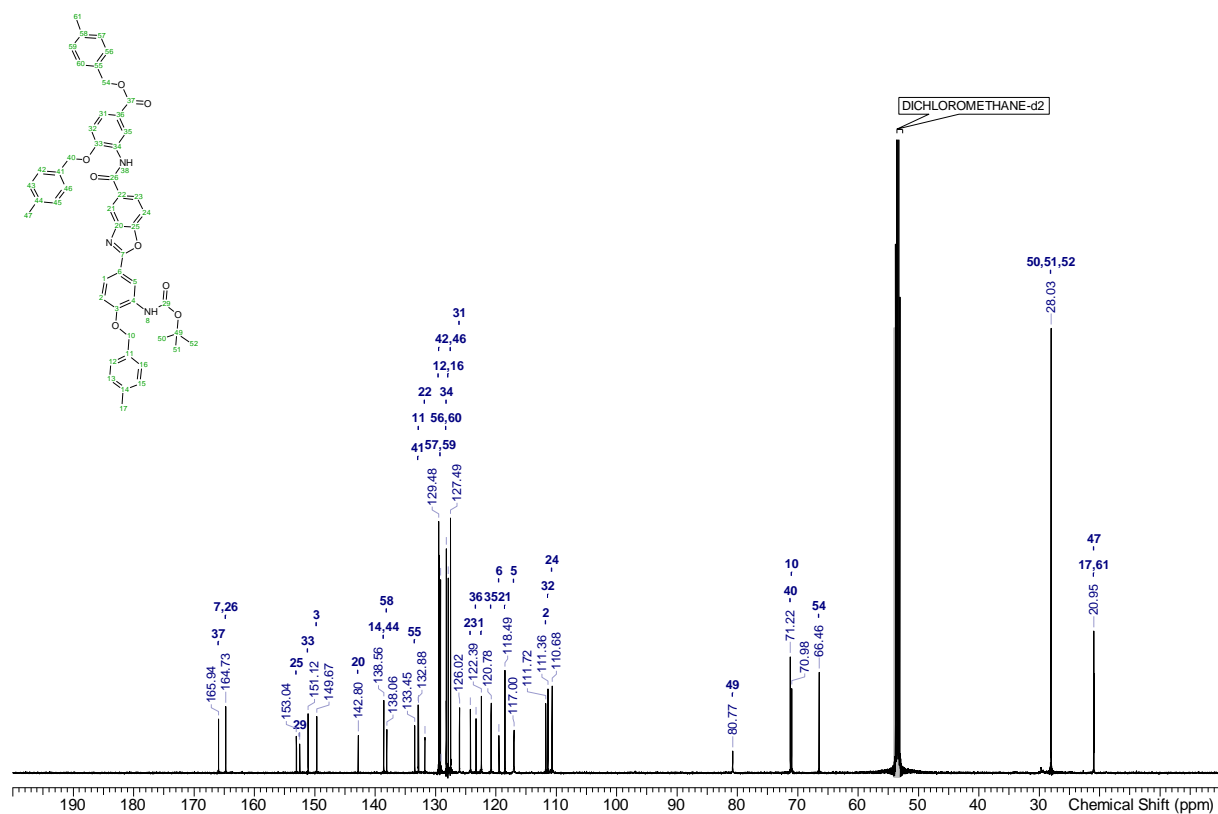Figure S61. <sup>13</sup>C NMR spectrum of 21.

## SUPPORTING INFORMATION

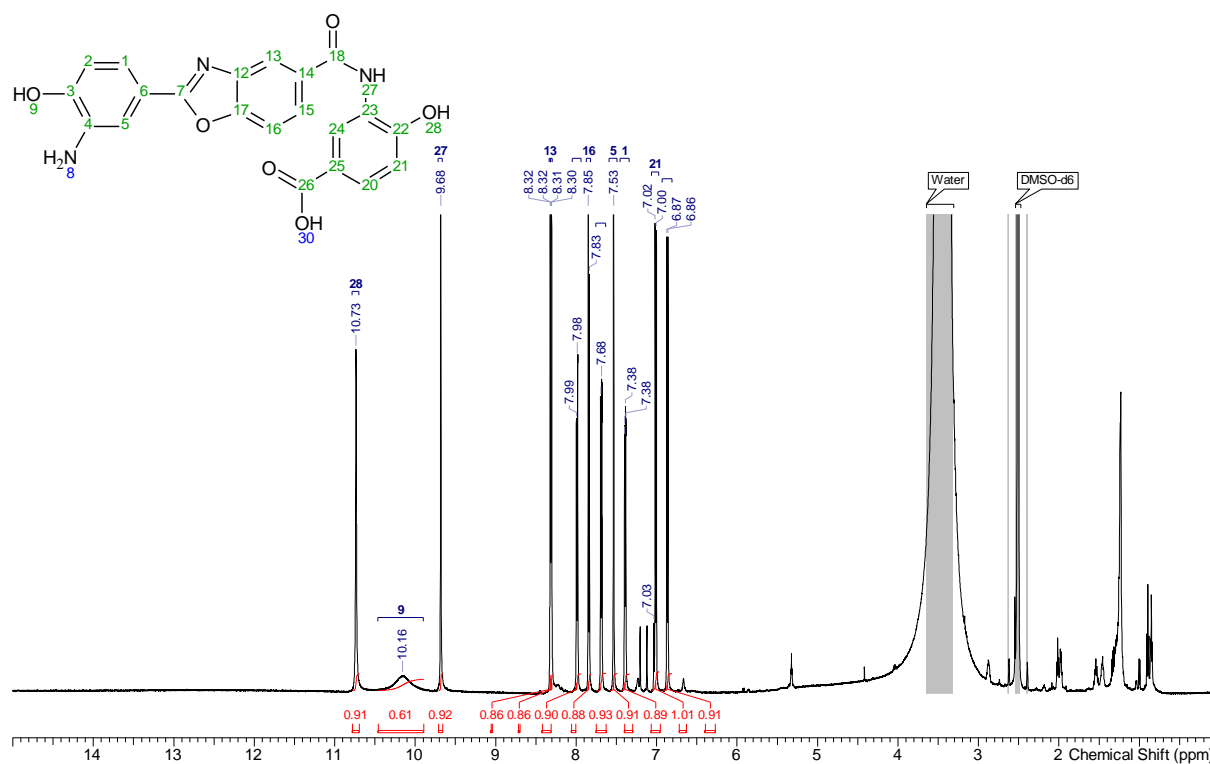

**Figure S62.**  $^1\text{H}$  NMR spectrum of synthetic **11**.

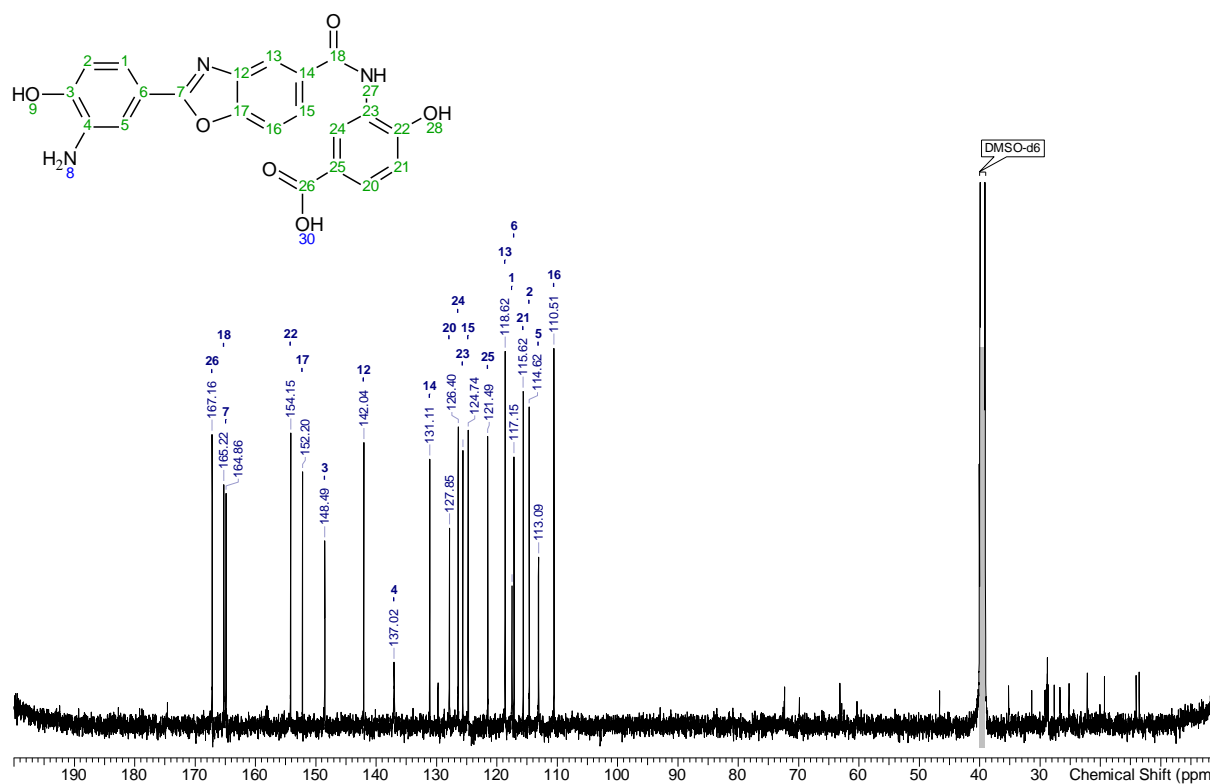

**Figure S63.**  $^{13}\text{C}$  NMR spectrum of synthetic **11**.

## SUPPORTING INFORMATION

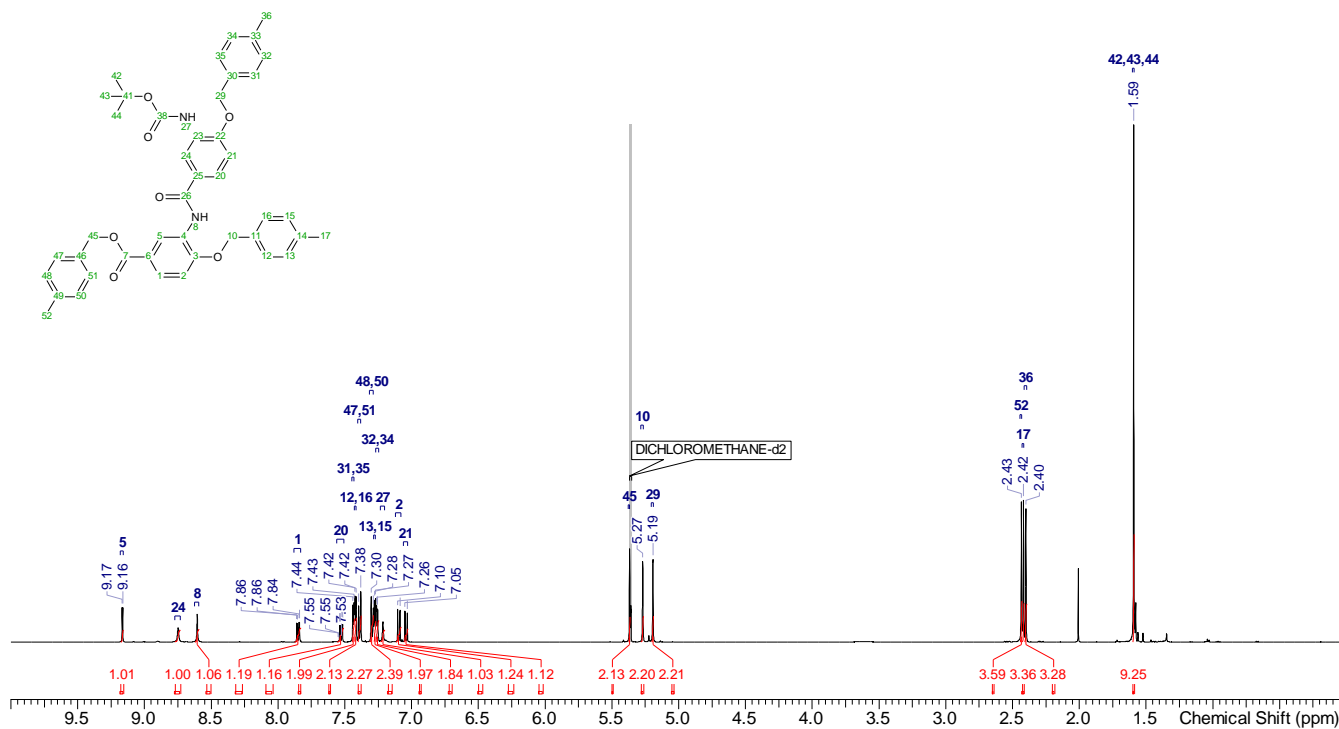

## SUPPORTING INFORMATION

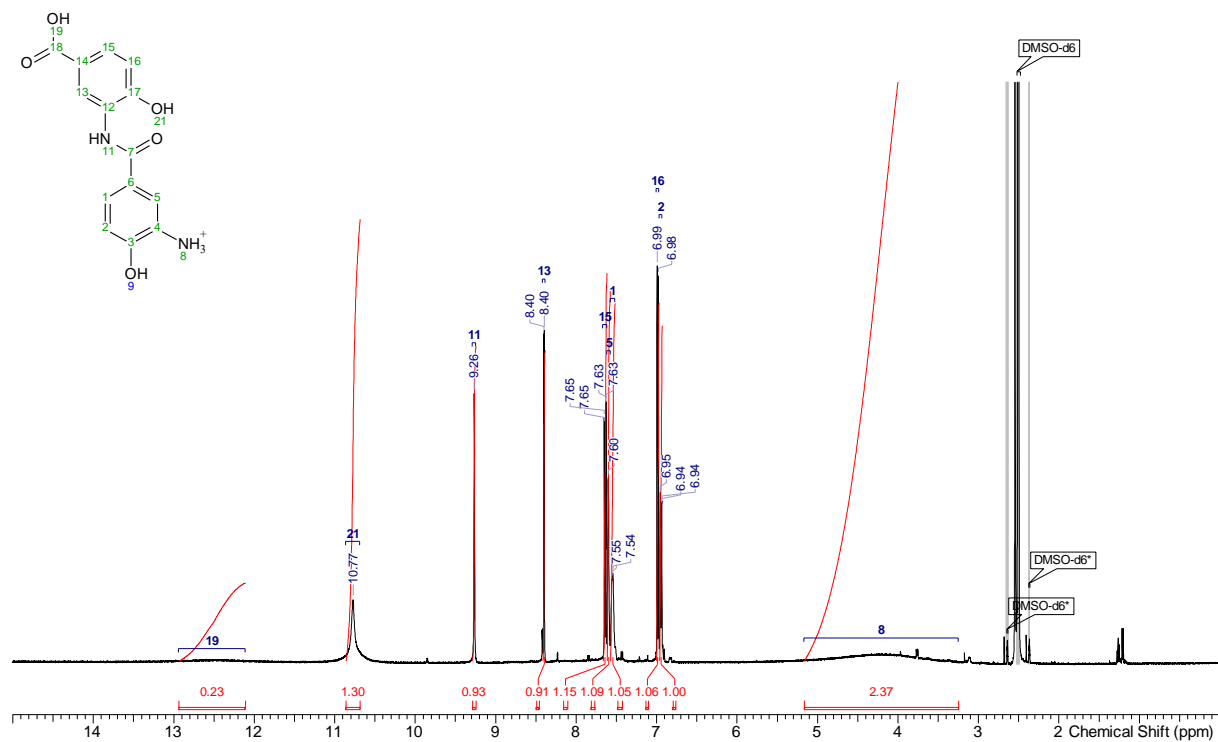

**Figure S66.**  $^1\text{H}$  NMR spectrum of **23**.

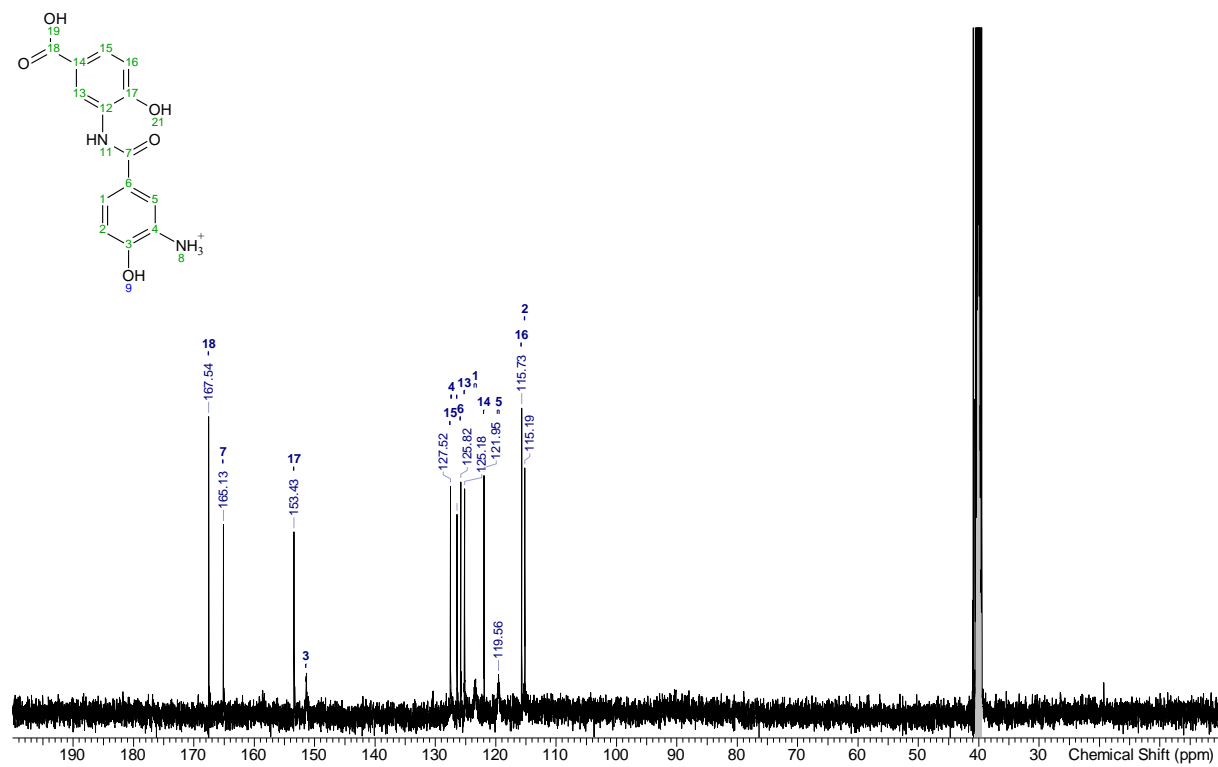

**Figure S67.**  $^{13}\text{C}$  NMR spectrum of **23**.

## SUPPORTING INFORMATION

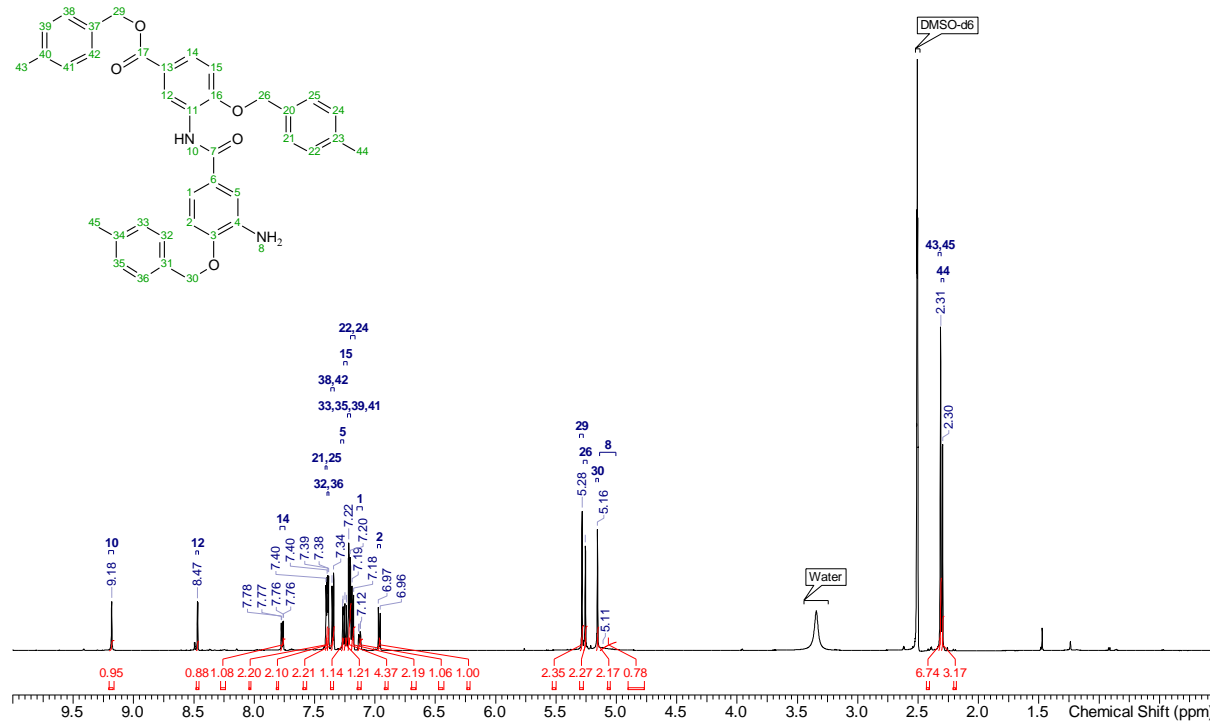

**Figure S68.**  $^1\text{H}$  NMR spectrum of **29**.

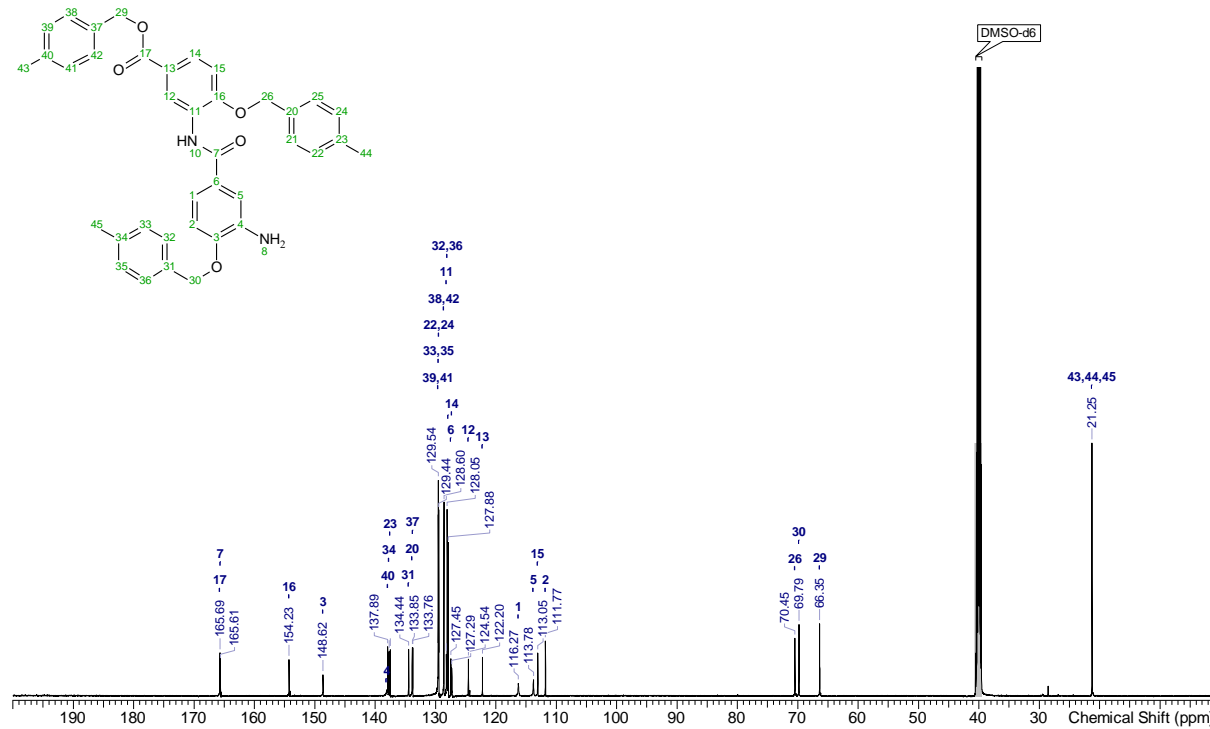

**Figure S69.**  $^{13}\text{C}$  NMR spectrum of **29**.



## SUPPORTING INFORMATION

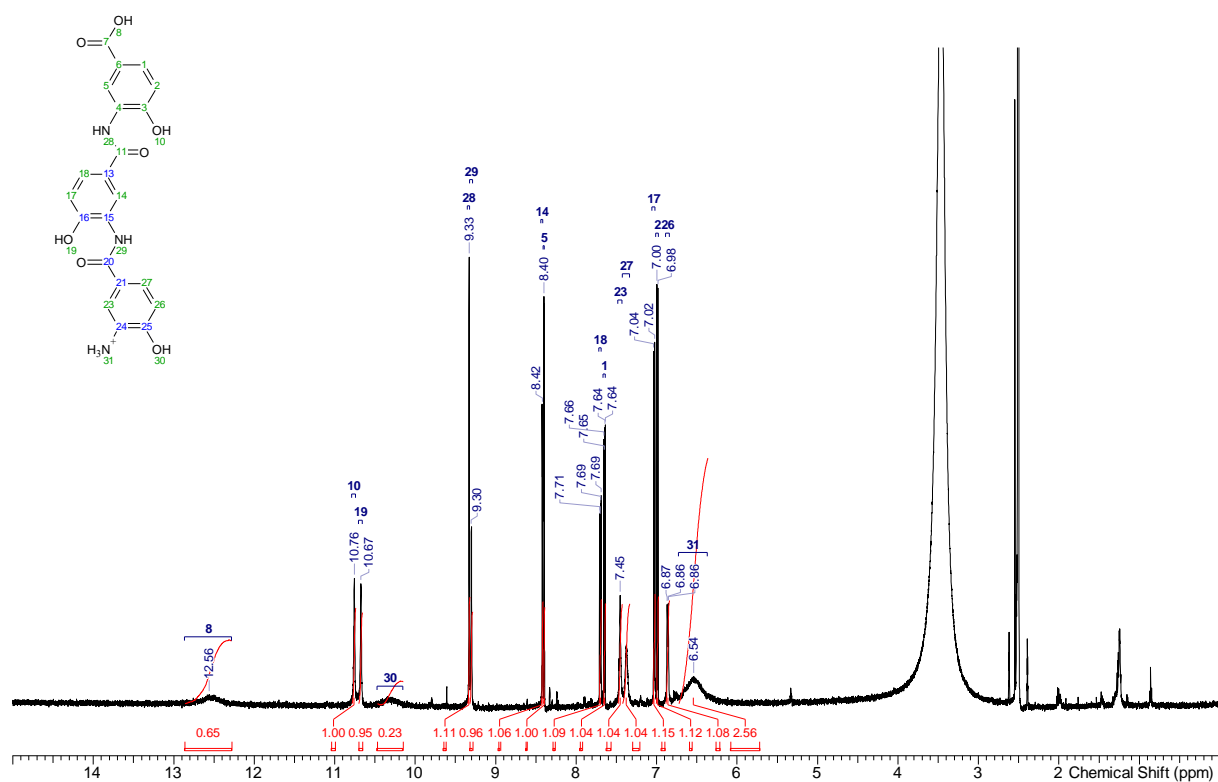

**Figure S70.**  $^1\text{H}$  NMR spectrum of **24** after the second preparative HPLC purification.

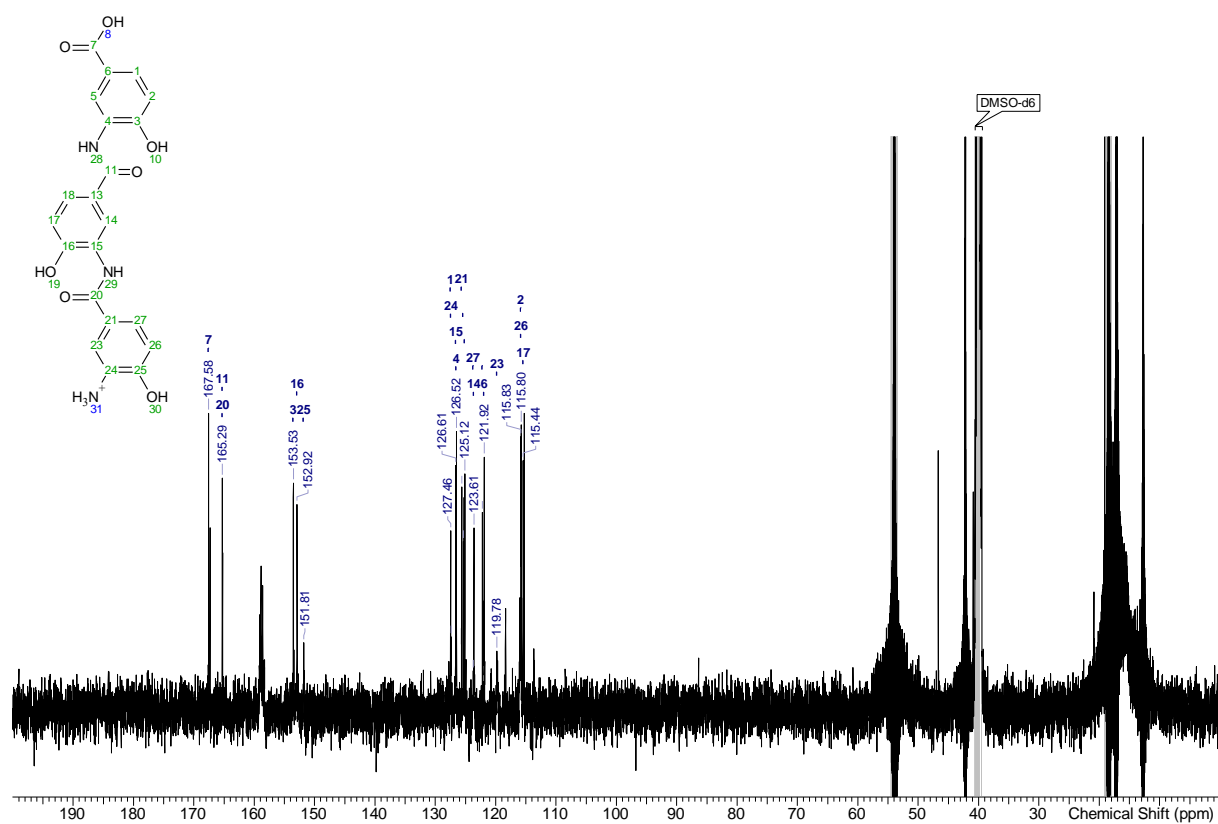

**Figure S71.**  $^{13}\text{C}$  NMR spectrum of **24** after the first preparative HPLC purification. Contains impurities in the range  $\delta = 12.7\text{--}54$  ppm.

## SUPPORTING INFORMATION

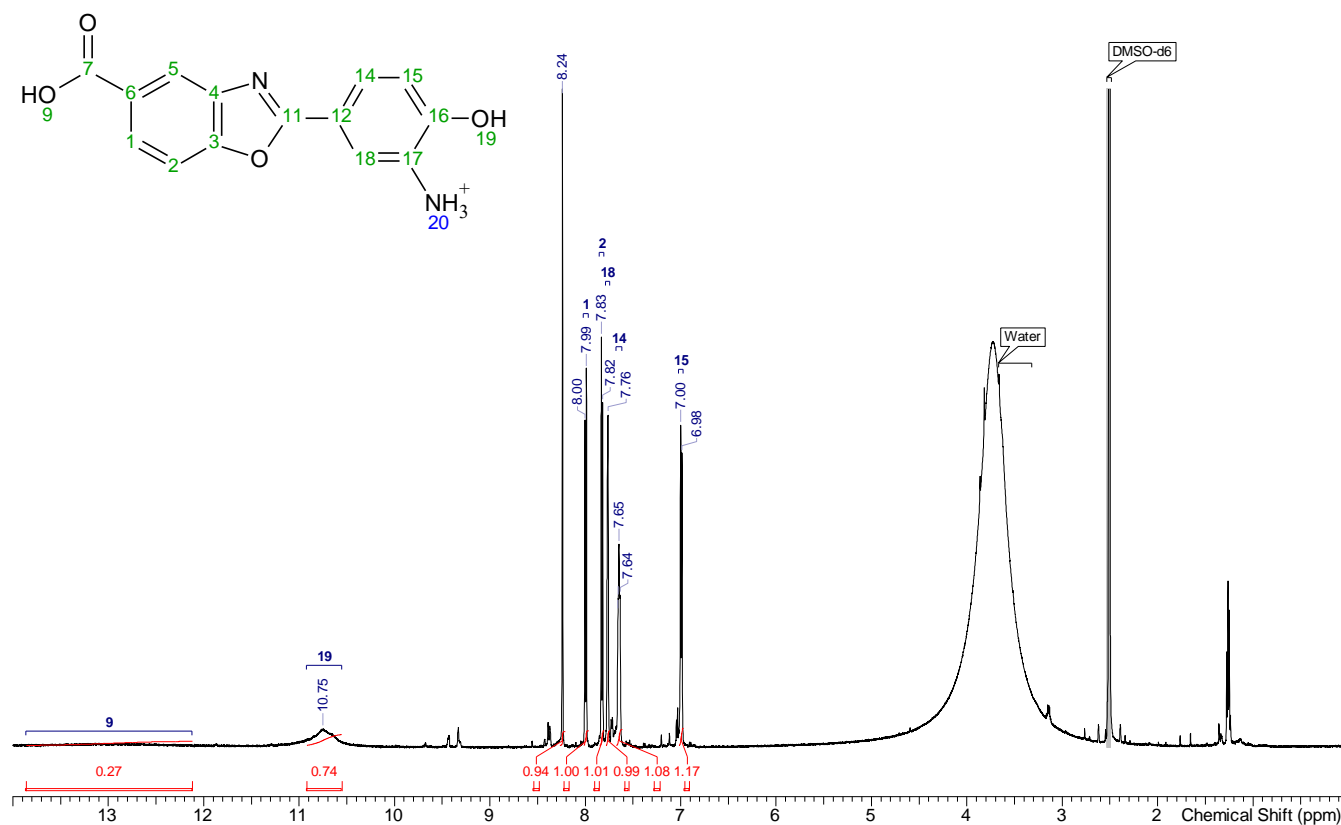

**Figure S72.**  $^1\text{H}$  NMR spectrum of **22**.

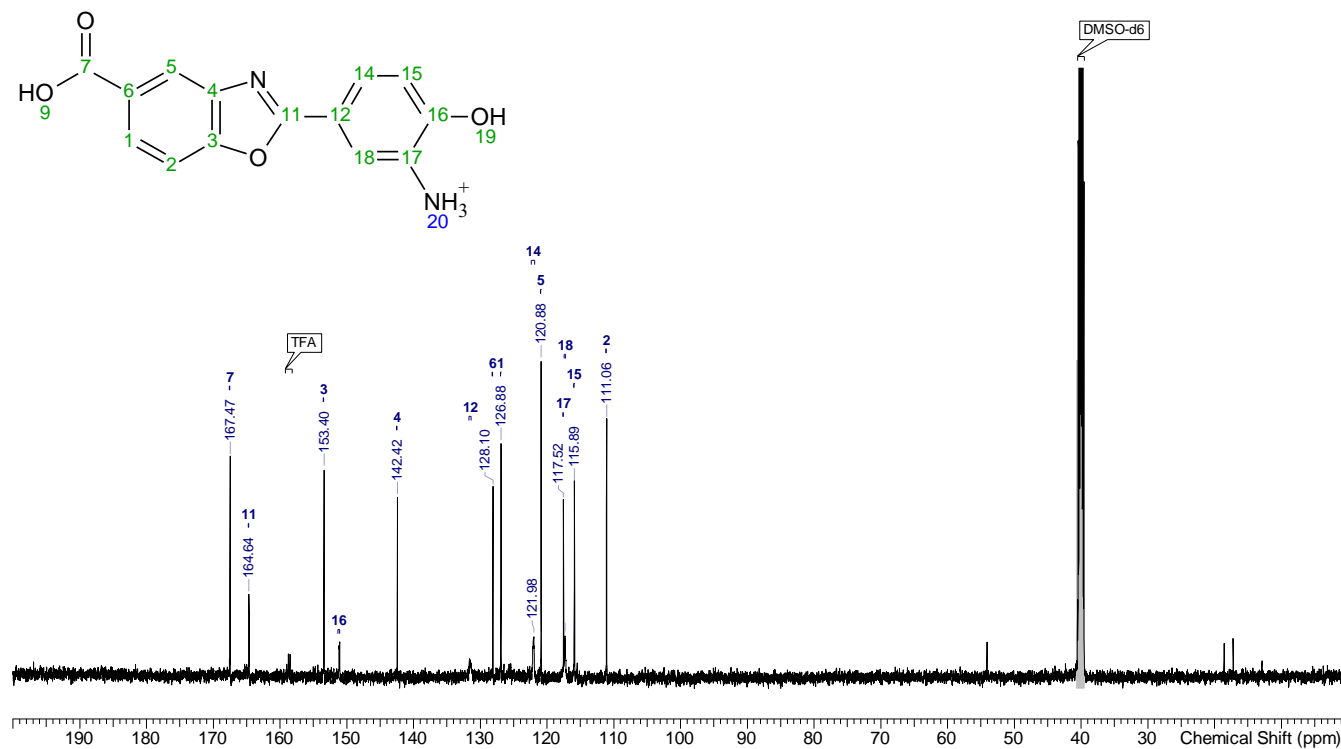

**Figure S73.**  $^{13}\text{C}$  NMR spectrum of **22**.

## SUPPORTING INFORMATION

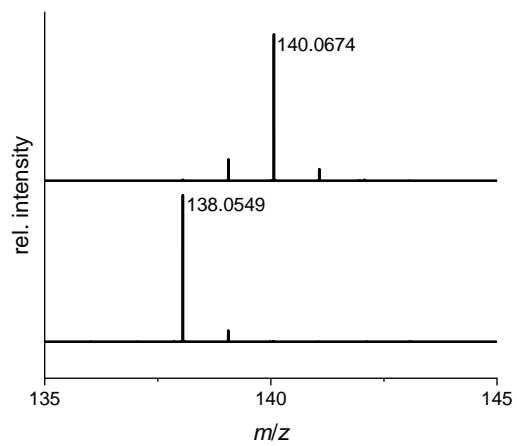

**Figure S74.** ESI-MS (positive mode) of 4-aminobenzoic acid and 4-aminobenzoic-3,5-d<sub>2</sub> acid (**30**).

### NatAM/ClxD hybrid sequence similarity network

To generate a sequence similarity network (SSN) that unites homologs of ClxD and NatAM, we performed several steps of bioinformatic analysis. Both ClxD and NatAM are assigned members of the amidohydrolase superfamily, which consists of over 167,000 sequences with a large sequence diversity coupled with high functional diversity. As a result, our initial SSN that was solely based on ClxD contained a large number of false positives (mostly associated with genes from primary metabolism, e.g. tRNA synthesis and sugar metabolism). We therefore constrained our search to ClxD homologs that are encoded in the vicinity of genes encoding enzymes putatively involved in amide bond formation/esterification, since benzoxazole ring formation requires the initial activation of the precursor molecule.<sup>[14]</sup> Furthermore, we recognized that our initial ClxD-based SSNs did not contain sequences of characterized heterocyclases involved in benzoxazole formation, like NatAM.<sup>[14]</sup> This prompted us to create a hybrid SSN derived from two SSNs that were based on ClxD and NatAM, respectively.

We created two independent primary SSNs based on homologs of ClxD and NatAM. Observing the respective Genome Neighborhood Diagrams from the resulting two networks, we manually selected homologs that were encoded in the vicinity of a gene encoding a putative carboxylate-activating enzyme (i.e. belonging to the enzyme family of e.g. CoA-ligases, ATP-grasp or non-ribosomal peptide synthetase), as activation of the precursor molecule is required prior the formation of the benzoxazole ring.<sup>[14]</sup> Specifically, if a group contained at least three biosynthetic gene clusters with this feature, all sequences of that group were selected to create a combined secondary network of both primary networks. This secondary network consisted of 1101 nodes, with a large amount of false positive sequences, meaning that the surrounding local genomic region indicated that the encoded proteins were putatively not involved in heterocycle formation. Therefore, we performed another round of refinement from this secondary network, to create a third-tier network. For this, we included only sequences of amidohydrolase-like enzymes that were found in synteny to genes encoding for enzymes putatively involved in precursor activation. All nodes corresponding to proteins not fulfilling this criterion were removed from the final cluster. We further excluded sequences we assumed to be involved in primary metabolism (e.g. fatty acid synthesis). The curated set of sequences was submitted to the EFI-EST tool to create the final network (Figure 4A, Table S7). Each node represents a ClxD/NatAM homolog located within a locus putatively involved in biosynthesis of benzoxazole-containing natural products.

## SUPPORTING INFORMATION

**Table S7.** List of ClxD and NatAM homologs used to construct the sequence similarity network.

| UniProt ID | Phylum         | Organism                                         | Cluster Number | Name       | Phylum         | Organism                                       | Cluster Number |
|------------|----------------|--------------------------------------------------|----------------|------------|----------------|------------------------------------------------|----------------|
| A0A022MQ12 | Actinobacteria | <i>Streptomyces</i> sp. Tu 6176.                 | 1              | A0A1H6BQ33 | Firmicutes     | <i>Paenibacillus</i> sp. UNC499MF.             | 3              |
| A0A069JYK6 | Actinobacteria | <i>Streptomyces</i> sp. NTK 937.                 | 1              | A0A1H7Q462 | Proteobacteria | <i>Stigmatella aurantiaca</i> .                | 3              |
| A0A0F4NQZ7 | Proteobacteria | <i>Pseudoalteromonas piscicida</i>               | 1              | A0A1H7VL29 | Proteobacteria | <i>Stigmatella aurantiaca</i> .                | 3              |
| A0A0M3TGE0 | Actinobacteria | <i>Streptomyces</i> sp. NRRL 12068.              | 1              | A0A1I0CG30 | Proteobacteria | <i>Stigmatella erecta</i> .                    | 3              |
| A0A0S2JZW8 | Proteobacteria | <i>Pseudoalteromonas phenolica</i>               | 1              | A0A1I0K391 | Proteobacteria | <i>Stigmatella erecta</i> .                    | 3              |
| A0A1A9CVR2 | Actinobacteria | <i>Streptomyces</i> sp. OspMP-M45.               | 1              | A0A1L3MR92 | Firmicutes     | <i>Bacillus weihaiensis</i> .                  | 3              |
| A0A1A9J422 | Actinobacteria | <i>Streptomyces</i> sp. SAT1.                    | 1              | A0A1L8I6X9 | Firmicutes     | <i>Bacillaceae bacterium</i> G1.               | 3              |
| A0A1B9ESB4 | Actinobacteria | <i>Streptomyces</i> sp. PTY08712.                | 1              | A0A1L8I7L1 | Firmicutes     | <i>Bacillaceae bacterium</i> G1.               | 3              |
| A0A1C3EJY0 | Proteobacteria | <i>Enterovibrio pacificus</i> .                  | 1              | A0A1L9AUS5 | Proteobacteria | <i>Cystobacter ferrugineus</i> .               | 3              |
| A0A111EPQ5 | Proteobacteria | <i>Pseudoalteromonas denitrificans</i> DSM 6059. | 1              | A0A1L9BFB9 | Proteobacteria | <i>Cystobacter ferrugineus</i> .               | 3              |
| A0A1S1Q9W8 | Actinobacteria | <i>Frankia soli</i> .                            | 1              | A0A1L9BJS0 | Proteobacteria | <i>Cystobacter ferrugineus</i> .               | 3              |
| A0A1S2NZ06 | Actinobacteria | <i>Streptomyces</i> sp. MUSC 93.                 | 1              | A0A1M6IZP1 | Firmicutes     | <i>Clostridium cavendishii</i> DSM 21758.      | 3              |
| A0A1T3NS67 | Actinobacteria | <i>Embleya scabrispora</i> .                     | 1              | A0A250J4T2 | Proteobacteria | <i>Cystobacter fuscus</i> .                    | 3              |
| A0A1V2PKF7 | Actinobacteria | <i>Actinosynnema</i> sp. ALI-1.44.               | 1              | A0A250JDR1 | Proteobacteria | <i>Cystobacter fuscus</i> .                    | 3              |
| A0A1V2QX27 | Actinobacteria | <i>Saccharothrix</i> sp. ALI-22-I.               | 1              | A0A2C1JZD7 | Firmicutes     | <i>Bacillus</i> sp. AFS040349.                 | 3              |
| A0A291RWE1 | Actinobacteria | <i>Nocardia terpenica</i> .                      | 1              | A0A2L0EPE2 | Proteobacteria | <i>Sorangium cellulosum</i>                    | 3              |
| A0A2G2IY40 | Proteobacteria | <i>Robiginotomaculum</i> sp.                     | 1              | A0A2L0F948 | Proteobacteria | <i>Sorangium cellulosum</i>                    | 3              |
| A0A2N3XUE2 | Actinobacteria | <i>Saccharopolyspora spinosa</i> .               | 1              | A0A2N2AFP4 | Firmicutes     | <i>Firmicutes bacterium</i> HGW-Firmicutes-8.  | 3              |
| A0A2R3ZQ04 | Actinobacteria | <i>Streptomyces</i> sp. FXJ1.235.                | 1              | A0A2N2DCE7 | Firmicutes     | <i>Firmicutes bacterium</i> HGW-Firmicutes-14. | 3              |
| A0A2R3ZQ18 | Actinobacteria | <i>Streptomyces olivaceus</i> .                  | 1              | A0A2N6RMA0 | Firmicutes     | <i>Bacillus</i> sp. UMB0899.                   | 3              |
| A0A2S2GIZ8 | Actinobacteria | <i>Streptomyces</i> sp. SM18.                    | 1              | A0A327S411 | Firmicutes     | <i>Bacillus</i> sp. YR335.                     | 3              |
| A0A2X3LF49 | Actinobacteria | <i>Frankia</i> sp. Ea1.12.                       | 1              | A0A353GUG8 | Firmicutes     | <i>Firmicutes bacterium</i> .                  | 3              |
| A0A327SUQ6 | Actinobacteria | <i>Streptomyces</i> sp. DpondAA-E10.             | 1              | A0A358R170 | Firmicutes     | <i>Desulfotomaculum</i> sp.                    | 3              |
| A0A345HY52 | Actinobacteria | <i>Streptomyces</i> sp. GSSD-12.                 | 1              | A0A369BHC4 | Firmicutes     | <i>Anaerobacterium chartisolvens</i> .         | 3              |
| A0A353K7B1 | Actinobacteria | <i>Streptomyces</i> sp.                          | 1              | A0A3A6N8Y5 | Firmicutes     | <i>Ammonifex</i> sp.                           | 3              |
| A0A384IVX2 | Actinobacteria | <i>Streptomyces</i> sp. AC1-42W.                 | 1              | A0A3N5C9S5 | Firmicutes     | <i>Aquisalibacillus elongatus</i> .            | 3              |
| A0A3B6XY02 | Proteobacteria | <i>Pseudoalteromonas piscicida</i> .             | 1              | A0A410WQE7 | Firmicutes     | <i>Paenibacillus chitinolyticus</i> .          | 3              |
| A0A3G8G7K0 | Actinobacteria | <i>Streptomyces olivaceus</i> .                  | 1              | A0A415S683 | Firmicutes     | <i>Ruminococcus gnavus</i> .                   | 3              |

## SUPPORTING INFORMATION

|            |                |                                                                                    |   |            |                |                                                                         |   |
|------------|----------------|------------------------------------------------------------------------------------|---|------------|----------------|-------------------------------------------------------------------------|---|
| A0A3N1KNU6 | Actinobacteria | <i>Streptomyces</i> sp. 844.5.                                                     | 1 | A0A4P2PXC6 | Proteobacteria | <i>Sorangium cellulosum</i>                                             | 3 |
| A0A3R9WZL5 | Actinobacteria | <i>Streptomyces</i> sp. WAC05292.                                                  | 1 | A0A4P2QL77 | Proteobacteria | <i>Sorangium cellulosum</i>                                             | 3 |
| A0A3T0VUV6 | Proteobacteria | <i>Hahella</i> sp. KA22.                                                           | 1 | A0A4R1SC97 | Firmicutes     | <i>Hydrogenispora ethanolica</i> .                                      | 3 |
| A0A401Z649 | Actinobacteria | <i>Embleya hyalina</i> .                                                           | 1 | A0A4R2B250 | Firmicutes     | <i>Bacillus foraminis</i> .                                             | 3 |
| A0A494UY7  | Actinobacteria | <i>Streptomyces fungicidicus</i> .                                                 | 1 | A0A4R2RZ62 | Firmicutes     | <i>Heliophilum fasciatum</i> .                                          | 3 |
| A0A495W5P6 | Actinobacteria | <i>Saccharothrix australiensis</i> .                                               | 1 | A0A4Y8IMR3 | Firmicutes     | <i>Filobacillus milosensis</i> .                                        | 3 |
| A0A495XLR0 | Actinobacteria | <i>Saccharothrix variisporea</i> .                                                 | 1 | A0A4Z0QP04 | Firmicutes     | <i>Desulfosporosinus</i> sp. Sb-LF.                                     | 3 |
| A0A4Q6Z1F2 | Proteobacteria | <i>Pseudoalteromonas</i> sp. CO342X.                                               | 1 | A0A5C6W596 | Firmicutes     | <i>Bacillus litoralis</i> .                                             | 3 |
| A0A4Q7IHK6 | Proteobacteria | <i>Pseudoalteromonas phenolica</i> .                                               | 1 | B0TEU6     | Firmicutes     | <i>Heliobacterium modesticaldum</i> (strain ATCC 51547 / lce1)          | 3 |
| A0A4R1DAU6 | Actinobacteria | <i>Frankia</i> sp. BMG5.11.                                                        | 1 | E3FE84     | Proteobacteria | <i>Stigmatella aurantiaca</i> (strain DW4/3-1)                          | 3 |
| A0A4R4WL11 | Actinobacteria | <i>Nonomuraea</i> sp. KC712.                                                       | 1 | F5LT05     | Firmicutes     | <i>Paenibacillus</i> sp. HGF7.                                          | 3 |
| A0A4R7BQY5 | Actinobacteria | <i>Streptomyces</i> sp. BK561.                                                     | 1 | L0FBW9     | Firmicutes     | <i>Desulfotobacterium dichloroeliminans</i> (strain LMG P-21439 / DCA1) | 3 |
| A0A4U3MHQ0 | Actinobacteria | <i>Herbidospora galbida</i> .                                                      | 1 | Q08U29     | Proteobacteria | <i>Stigmatella aurantiaca</i> (strain DW4/3-1)                          | 3 |
| A0A514K0I8 | Actinobacteria | <i>Streptomyces asterosporus</i> .                                                 | 1 | S9PHF5     | Proteobacteria | <i>Cystobacter fuscus</i> DSM 2262.                                     | 3 |
| A0A542DPU5 | Actinobacteria | <i>Amycolatopsis cihanbeyliensis</i> .                                             | 1 | S9PI54     | Proteobacteria | <i>Cystobacter fuscus</i> DSM 2262.                                     | 3 |
| A0A542Q2C3 | Actinobacteria | <i>Streptomyces</i> sp. SLBN-118.                                                  | 1 | S9QJL5     | Proteobacteria | <i>Cystobacter fuscus</i> DSM 2262.                                     | 3 |
| A0A542W7M6 | Actinobacteria | <i>Streptomyces</i> sp. SLBN-134.                                                  | 1 | A0A0S7YXA1 | Proteobacteria | <i>Gammaproteobacteria</i> bacterium SG8_30.                            | 4 |
| A0A560XIX7 | Actinobacteria | <i>Streptomyces</i> sp. T12.                                                       | 1 | A0A127F0Q4 | Proteobacteria | <i>Rhodoplanes</i> sp. Z2-YC6860.                                       | 4 |
| A0A5P1YK20 | Actinobacteria | <i>Streptomyces tendae</i> .                                                       | 1 | A0A1E3ZKZ0 | Proteobacteria | <i>Bordetella</i> sp. SCN 67-23.                                        | 4 |
| A0A5S3RZX5 | Proteobacteria | <i>Pseudoalteromonas flavipulchra</i> .                                            | 1 | A0A1I1A2G5 | Proteobacteria | <i>Rhizobium</i> sp. NFR07.                                             | 4 |
| A0A5S3YRH6 | Proteobacteria | <i>Pseudoalteromonas phenolica</i> .                                               | 1 | A0A1I4A2B0 | Proteobacteria | <i>Roseomonas stagni</i> DSM 19981.                                     | 4 |
| A0A652K8Z4 | Actinobacteria | <i>Streptomyces</i> sp. ms191.                                                     | 1 | A0A1I4DT21 | Proteobacteria | <i>Roseomonas stagni</i> DSM 19981.                                     | 4 |
| A0A6B1LQW8 | Actinobacteria | <i>Streptomyces</i> sp. SID8360.                                                   | 1 | A0A1Q3Y2P9 | Proteobacteria | <i>Burkholderiales</i> bacterium 67-32.                                 | 4 |
| A8L0C1     | Actinobacteria | <i>Frankia</i> sp. (strain EAN1pec)                                                | 1 | A0A1W7MCR7 | Proteobacteria | <i>Novosphingobium</i> sp. MD-1.                                        | 4 |
| D3FAQ8     | Actinobacteria | <i>Conexibacter woesei</i> (strain DSM 14684 / JCM 11494 / NBRC 100937 / ID131577) | 1 | A0A1Y5TT08 | Proteobacteria | <i>Oceanibacterium hippocampi</i> .                                     | 4 |
| D9XKS5     | Actinobacteria | <i>Streptomyces griseoflavus</i> Tu4000.                                           | 1 | A0A1Z9DWP9 | Proteobacteria | <i>Cellvibrionales</i> bacterium TMED122.                               | 4 |
| G2NKI2     | Actinobacteria | <i>Streptomyces</i> sp. (strain SirexA-A-E / ActE)                                 | 1 | A0A1Z9JI97 | Proteobacteria | <i>Rhodospirillaceae</i> bacterium TMED167.                             | 4 |
| Q2S818     | Proteobacteria | <i>Hahella chejuensis</i> (strain KCTC 2396)                                       | 1 | A0A208XTQ8 | Proteobacteria | <i>Pigmentiphaga</i> sp. NML030171.                                     | 4 |
| A0A081XYL9 | Actinobacteria | <i>Streptomyces toyocaensis</i> .                                                  | 2 | A0A208XXT8 | Proteobacteria | <i>Pigmentiphaga</i> sp. NML080357.                                     | 4 |
| A0A0K3BLZ2 | Actinobacteria | <i>Kibdelosporangium</i> sp. MJ126-NF4.                                            | 2 | A0A226WPR1 | Proteobacteria | <i>Caballeronia sordidicola</i> .                                       | 4 |

## SUPPORTING INFORMATION

|            |                |                                                |   |            |                |                                                                                                                     |   |
|------------|----------------|------------------------------------------------|---|------------|----------------|---------------------------------------------------------------------------------------------------------------------|---|
| A0A0W7X8R0 | Actinobacteria | <i>Streptomyces silvensis</i> .                | 2 | A0A226WQT7 | Proteobacteria | <i>Caballeronia sordidicola</i> .                                                                                   | 4 |
| A0A132MUD4 | Actinobacteria | <i>Streptomyces thermoautotrophicus</i> .      | 2 | A0A2D9HTF5 | Other          | <i>Dehalococcoidia bacterium</i> .                                                                                  | 4 |
| A0A132N6J5 | Actinobacteria | <i>Streptomyces thermoautotrophicus</i> .      | 2 | A0A2E2P9F9 | Proteobacteria | <i>Pseudooceanicola</i> sp.                                                                                         | 4 |
| A0A1B1MGF2 | Actinobacteria | <i>Streptomyces lincolnensis</i> .             | 2 | A0A3D3DQY0 | Proteobacteria | <i>Gammaproteobacteria</i> bacterium.                                                                               | 4 |
| A0A1C6RY45 | Actinobacteria | <i>Micromonospora inyonensis</i> .             | 2 | A0A3G8GL07 | Proteobacteria | <i>Pigmentiphaga</i> sp. H8.                                                                                        | 4 |
| A0A1C6TJD2 | Actinobacteria | <i>Micromonospora pallida</i> .                | 2 | A0A3R9YDS3 | Proteobacteria | <i>Mesorhizobium carbonis</i> .                                                                                     | 4 |
| A0A1I5AS71 | Actinobacteria | <i>Streptomyces</i> sp. cf124.                 | 2 | A0A4D7QKP7 | Proteobacteria | <i>Phreatobacter</i> sp. NMCR1094.                                                                                  | 4 |
| A0A1M7KXY3 | Actinobacteria | <i>Cryptosporangium aurantiacum</i> .          | 2 | A0A4V2F345 | Proteobacteria | <i>Pigmentiphaga kullae</i> .                                                                                       | 4 |
| A0A1M7Q7X0 | Actinobacteria | <i>Streptomyces paucisporeus</i> .             | 2 | A0A520NMM0 | Proteobacteria | <i>Rhodospirillaceae</i> bacterium.                                                                                 | 4 |
| A0A1Q5HKL7 | Actinobacteria | <i>Micromonospora</i> sp. TSRI0369.            | 2 | A0A523FZ10 | Proteobacteria | <i>Alphaproteobacteria</i> bacterium.                                                                               | 4 |
| A0A1Q7BS35 | Actinobacteria | Actinobacteria bacterium<br>13_2_20CM_2_71_6.  | 2 | A0A561R7J2 | Proteobacteria | <i>Neorhizobium alkalisoli</i> .                                                                                    | 4 |
| A0A1Q7WC88 | Actinobacteria | Actinobacteria bacterium<br>13_1_20CM_3_71_11. | 2 | A0A5B0X485 | Proteobacteria | <i>Halioglobus</i> sp. NY5.                                                                                         | 4 |
| A0A1Q8C5E0 | Actinobacteria | <i>Actinophytocola xanthii</i> .               | 2 | A0A5B8LX18 | Proteobacteria | <i>Devosia ginsengisoli</i> .                                                                                       | 4 |
| A0A1R3UQE1 | Actinobacteria | <i>Nocardiopsis</i> sp. JB363.                 | 2 | A0A5N7RPN6 | Proteobacteria | Alcaligenaceae bacterium SAGV5.<br>Salpiger bermudensis (strain DSM<br>26914 / JCM 13377 / KCTC 12554<br>/HTCC2601) | 4 |
| A0A1R3UUX6 | Actinobacteria | <i>Nocardiopsis</i> sp. JB363.                 | 2 | Q0FX15     | Proteobacteria |                                                                                                                     | 4 |
| A0A1V2QKL5 | Actinobacteria | <i>Actinosynnema</i> sp. ALI-1.44.             | 2 | A0A4R4X5S5 | Actinobacteria | <i>Nonomuraea</i> sp. KC712.                                                                                        | 5 |
| A0A250JBU6 | Proteobacteria | <i>Cystobacter fuscus</i> .                    | 2 | A0A351CR38 | Actinobacteria | <i>Micrococcaceae</i> bacterium.                                                                                    | 5 |
| A0A2K9F6Q1 | Actinobacteria | <i>Streptomyces</i> sp. CMB-StM0423.           | 2 | A0A2Z5JSH8 | Actinobacteria | <i>Streptomyces atratus</i> .                                                                                       | 5 |
| A0A2M8LVH4 | Actinobacteria | <i>Streptomyces carminius</i> .                | 2 | A0A2M9MEH7 | Actinobacteria | <i>Streptomyces</i> sp. CB02959.                                                                                    | 5 |
| A0A2M9AKN2 | Actinobacteria | <i>Streptomyces</i> sp. CNZ306.                | 2 | A0A1G7Z4A2 | Actinobacteria | <i>Nonomuraea jiangxiensis</i> .<br>SAR202 cluster bacterium lo17-<br>Chloro-G3.                                    | 5 |
| A0A2N0GUU5 | Actinobacteria | <i>Streptomyces</i> sp. Ag109_G2-1.            | 2 | A0A2N0LDN1 | Other          |                                                                                                                     | 5 |
| A0A2P2GUI3 | Actinobacteria | <i>Streptomyces showdoensis</i> .              | 2 | A0A2E3AKC5 | Other          | <i>Chloroflexi</i> bacterium.                                                                                       | 5 |
| A0A2T0LTG0 | Actinobacteria | <i>Prauserella shujinwangii</i> .              | 2 | C5CJW1     | Proteobacteria | <i>Variovorax paradoxus</i> (strain S110)                                                                           | 5 |
| A0A316EXH0 | Actinobacteria | <i>Actinoplanes xinjiangensis</i> .            | 2 | A0A561CK72 | Proteobacteria | <i>Variovorax</i> sp. T529.                                                                                         | 5 |
| A0A317RQL4 | Actinobacteria | <i>Actinokineospora mزابensis</i> .            | 2 | A0A3P3EJH2 | Proteobacteria | <i>Variovorax</i> sp. T529.                                                                                         | 5 |
| A0A372GGC5 | Actinobacteria | <i>Actinomadura</i> sp. LHW52907.              | 2 | A0A1H4DZB1 | Proteobacteria | <i>Variovorax</i> sp. YR216.                                                                                        | 5 |
| A0A385ATE4 | Actinobacteria | <i>Micromonospora</i> sp. B006.                | 2 | S9TMZ5     | Proteobacteria | <i>Ralstonia</i> sp. AU12-08.                                                                                       | 6 |
| A0A3D9ZUZ7 | Actinobacteria | <i>Asanoa ferruginea</i> .                     | 2 | A0A401K1J1 | Proteobacteria | <i>Ralstonia</i> sp. SET104.                                                                                        | 6 |
| A0A3N5AKY6 | Actinobacteria | <i>Streptomyces</i> sp. Ag109_G2-6.            | 2 | A0A2N5L629 | Proteobacteria | <i>Ralstonia mannitolilytica</i> .                                                                                  | 6 |

## SUPPORTING INFORMATION

|            |                |                                           |   |            |                |                                                              |           |
|------------|----------------|-------------------------------------------|---|------------|----------------|--------------------------------------------------------------|-----------|
| A0A3S8X5S5 | Actinobacteria | <i>Streptomyces</i> sp. WAC 01438.        | 2 | A0A1I5RUY0 | Proteobacteria | <i>Ralstonia</i> sp. NFACC01.                                | 6         |
| A0A423V2B7 | Actinobacteria | <i>Streptomyces globisporus</i> .         | 2 | A0A1C0XPQ9 | Proteobacteria | <i>Ralstonia pickettii</i>                                   | 6         |
| A0A428WTV2 | Actinobacteria | <i>Actinoplanes</i> sp. ATCC 53533.       | 2 | A0A192A6J3 | Proteobacteria | <i>Ralstonia insidiosa</i> .                                 | 6         |
| A0A428YCH1 | Actinobacteria | <i>Kibdelosporangium aridum</i> .         | 2 | A0A100HUI7 | Proteobacteria | <i>Ralstonia</i> sp. NT80.                                   | 6         |
| A0A429A977 | Actinobacteria | <i>Streptomyces</i> sp. WAC 01420.        | 2 | A0A0G3EQ02 | Proteobacteria | <i>Pandoraea thiooxydans</i> .                               | 6         |
| A0A495JN82 | Actinobacteria | <i>Micromonospora pisi</i> .              | 2 | A0A0F0EA18 | Proteobacteria | <i>Burkholderiaceae</i> bacterium 26.                        | 6         |
| A0A495QK8  | Actinobacteria | <i>Actinomadura pelletieri</i> DSM 43383. | 2 | A0A1V2KUV2 | Actinobacteria | <i>Frankia</i> sp. Ccl49.                                    | 7         |
| A0A4D4JEJ6 | Actinobacteria | <i>Gandjariella thermophila</i> .         | 2 | A0A0S4QH26 | Actinobacteria | <i>Frankia irregularis</i> .                                 | 7         |
| A0A4Q8BQ11 | Actinobacteria | <i>Streptomyces</i> sp. CNZ288.           | 2 | A0A0N8HBW1 | Actinobacteria | <i>Frankia</i> sp. R43.                                      | 7         |
| A0A4R3S2P3 | Actinobacteria | <i>Streptomyces</i> sp. BK215.            | 2 | A0A1F7P2J3 | Other          | Candidatus Rokubacteria bacterium RIFCSPLOWO2_02_FULL_72_37. | 8         |
| A0A4R6JCI3 | Actinobacteria | <i>Actinoplanes brasiliensis</i> .        | 2 | A0A1F3YND1 | Proteobacteria | Betaproteobacteria bacterium RBG_16_64_18.                   | 8         |
| A0A505HIW9 | Actinobacteria | <i>Micromonospora</i> sp. XM-20-01.       | 2 | A0A140GVS8 | Proteobacteria | <i>Rhodoplanes</i> sp. Z2-YC6860.                            | 8         |
| A0A538ER75 | Actinobacteria | <i>Actinobacteria</i> bacterium.          | 2 | A0A378REZ6 | Actinobacteria | <i>Mycolicobacterium aichiense</i> .                         | 9         |
| A0A538N4C9 | Actinobacteria | <i>Actinobacteria</i> bacterium.          | 2 | A0A1J0UEI2 | Actinobacteria | <i>Mycobacterium</i> sp. WY10.                               | 9         |
| A0A542W6J4 | Actinobacteria | <i>Streptomyces</i> sp. SLBN-134.         | 2 | A0A0Q9JAR7 | Actinobacteria | <i>Mycobacterium</i> sp. Soil538.                            | 9         |
| A0A559UE18 | Actinobacteria | <i>Streptomyces</i> sp. CNZ289.           | 2 | A0A3D1QC12 | Firmicutes     | <i>Syntrophomonas</i> sp.                                    | 10        |
| A0A562WC22 | Actinobacteria | <i>Micromonospora sagamiensis</i> .       | 2 | A0A356UE87 | Firmicutes     | <i>Syntrophomonas</i> sp.                                    | 10        |
| D9XNL5     | Actinobacteria | <i>Streptomyces griseoflavus</i> Tu4000.  | 2 | A0A1V5CUD0 | Proteobacteria | <i>Syntrophorhabdus</i> sp. PtaU1.Bin058.                    | 10        |
| H8G469     | Actinobacteria | <i>Saccharomonospora azurea</i> NA-128.   | 2 | A0A1T3P4I3 | Actinobacteria | <i>Embleya scabrispora</i> .                                 | 11        |
| I1WE21     | Actinobacteria | <i>Streptomyces</i> sp. WT3.              | 2 | A0A0P6XQ18 | Other          | <i>Thermanaerotherix daxensis</i> .                          | 11        |
| R4LPJ6     | Actinobacteria | <i>Actinoplanes</i> sp. N902-109.         | 2 | A0A1M6QP99 | Proteobacteria | <i>Desulfatibacillum alkenivorans</i> DSM 16219.             | 11        |
| S9Q2R2     | Proteobacteria | <i>Cystobacter fuscus</i> DSM 2262.       | 2 | A0A3A4TTV9 | Firmicutes     | <i>Firmicutes</i> bacterium.                                 | 12        |
| W7V9Z2     | Actinobacteria | <i>Micromonospora</i> sp. M42.            | 2 | A0A3M1R8R6 | other          | <i>Nitrospinae</i> bacterium.                                | 12        |
| A0A017SY51 | Proteobacteria | <i>Chondromyces apiculatus</i> DSM 436.   | 3 | A0A5J6MM47 | Proteobacteria | <i>Hypericibacter terrae</i> .                               | 12        |
| A0A0E4GCE9 | Firmicutes     | <i>Syntrophomonas zehnderi</i> OL-4.      | 3 | A0A662VY29 | Other          | <i>Archaeoglobales archaeon</i> .                            | 13        |
| A0A0K1E9U0 | Proteobacteria | <i>Chondromyces crocatus</i> .            | 3 | A0A661JQ04 | Proteobacteria | <i>Deltaproteobacteria</i> bacterium.                        | 13        |
| A0A0M1N1E3 | Firmicutes     | <i>Paenibacillus solani</i> .             | 3 | A0A3A4PJF5 | Actinobacteria | <i>Actinobacteria</i> bacterium.                             | singleton |
| A0A0Q0XD16 | Proteobacteria | <i>Acidovorax</i> sp. SD340.              | 3 | A0A197SU18 | Actinobacteria | <i>Streptomyces</i> sp. ERV7.                                | singleton |
| A0A0Q6L5W3 | Firmicutes     | <i>Bacillus</i> sp. Leaf406.              | 3 | A0A3R7TJK6 | Bacteroidetes  | <i>Flavobacteriales</i> bacterium TMED96.                    | singleton |
| A0A150TEY9 | Proteobacteria | <i>Sorangium cellulosum</i>               | 3 | A0A1W9RSX8 | Other          | Candidatus Omnitrphica bacterium 4484_70.2.                  | singleton |



## SUPPORTING INFORMATION

---

|            |            |                                           |   |            |                |                                     |           |
|------------|------------|-------------------------------------------|---|------------|----------------|-------------------------------------|-----------|
| A0A179SSS7 | Firmicutes | <i>Bacillus litoralis</i> .               | 3 | A0A1V4SP16 | Firmicutes     | <i>Ruminiclostridium hungatei</i>   | singleton |
| A0A179SYB7 | Firmicutes | <i>Bacillus litoralis</i> .               | 3 | A0A2E4MRF2 | Other          | <i>Gemmatimonadetes bacterium</i> . | singleton |
| A0A1G3LDE2 | Other      | <i>Spirochaetes bacterium</i> GWB1_27_13. | 3 | E1YGH5     | Proteobacteria | <i>Desulfobacterium</i> sp.         | singleton |
|            |            |                                           |   | A0A3G8GUG1 | Proteobacteria | <i>Pigmentiphaga</i> sp. H8.        | singleton |
|            |            |                                           |   | A0A291IHW0 | Proteobacteria | <i>Methylomonas koyamae</i> .       | singleton |
|            |            |                                           |   | A0A1M5ZE55 | Proteobacteria | <i>Candidimonas bauzanensis</i> .   | singleton |

---

### Identification of a putative nocarbenzoxazole BGC

We used BLAST to find that *N. lucentensis* DSM 44048 genome contains a gene encoding a ClxD homolog (the whole genome sequence of *N. lucentensis* DSM 44048 is not deposited in the Uniprot Database meaning that it is absent from the SSN). Upon closer inspection of the *N. lucentensis* DSM 44048 locus, it became apparent that genes encoding ClxA, ClxB and ClxE homologs are present in the vicinity of the gene encoding the *clxD* homolog (Figure S75). Drawing on our knowledge of the function ClxA–E in closoxazole biosynthesis and taking the structure of nocarbenzoxazole G (**6**) into account, we could envision a putative biosynthetic route to the *meta*-substituted benzoxazole core of nocarbenzoxazole G (**6**). We identified additional genes in the genome neighborhood that could possibly encode the necessary enzymes for further modification of the core structure. We tentatively named this locus *noc*.

Specifically, the *noc* locus harbors genes encoding homologs of ClxB (*nocB*) and ClxE (*nocC*) that we assign as likely involved in the formation of 3,4-AHBA, which has been proposed as the required building block for nocarbenzoxazole G.<sup>[15]</sup> The putative aspartokinase (*nocA*) is probably involved in early steps to form aspartate semialdehyde, a precursor in 3,4-AHBA formation.<sup>[16]</sup> Furthermore, we found genes encoding homologs of ClxA/C (*nocN*) and ClxD (*nocM*), which could catalyze fusion and heterocyclization of two 3,4-AHBA moieties resulting in the benzoxazole **22** (Figure 4C). We envision that subsequent tailoring steps leading to the cytotoxic nocarbenzoxazole G (**6**) may be catalyzed by proteins encoded by *nocJ–L* and *nocD,E,G*. NocJ shows similarity to EhpF, a member of the ANL superfamily that is believed to act together with EhpG, a putative NAD(P)H-dependent aldehyde dehydrogenase, in the reduction of a carboxylic acid to the corresponding aldehyde in  $\text{D}$ -alanylgriseoluteic acid biosynthesis.<sup>[17]</sup> In analogy, the enzyme encoded by *nocJ* and the putative aldehyde dehydrogenase encoded in *nocK* may cooperate to reduce the carboxylic acid of **22** to form the corresponding aldehyde. The gene *nocL* is annotated to encode an alcohol dehydrogenase which likely catalyzes further reduction of the aldehyde to afford the corresponding alcohol. Consequently, NocJ–L are probably involved in the reduction of the carboxylic acid of the dimer benzoxazole **22** to form the corresponding alcohol. Finally, NocG is a predicted FAD-binding oxidoreductase, and a member of this family has recently been reported to conduct deamination in saframycin A biosynthesis.<sup>[18]</sup> The gene *nocD* encodes a member of the tyrosinase family and *nocE* its cofactor, which are known to perform oxidation of phenols.<sup>[19]</sup> Therefore, NocD, E and G possibly act together in deamination of the hydroxyanilin moiety. We suspect that subsequent methylation to yield the final product **6** is probably conducted by an *O*-methyltransferase encoded elsewhere in the genome, as proposed in nataxazole biosynthesis.<sup>[20]</sup> Our characterization of the *clx* cluster and bioinformatic analysis lead us to identify a strong candidate locus for nocarbenzoxazole biosynthesis, potentially laying the foundation to link an orphan natural product to its cognate BGC.

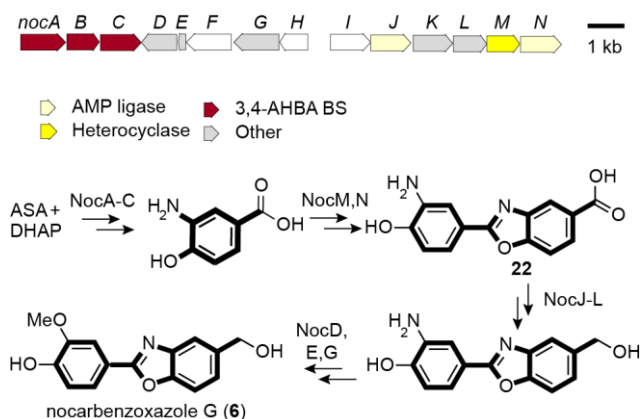

**Figure S75.** Proposed pathway for biosynthesis of nocarbenzoxazole G by *N. lucentensis* DSM 44048. ASA: L-aspartate-4-semialdehyde. BS: Biosynthesis. DHAP: dihydroxyacetone phosphate.

## SUPPORTING INFORMATION

**Table S8.** Annotated functions of open reading frames of the putative nocarbenzoxazole biosynthetic gene cluster.

| <i>N. lucentensis</i> DSM 44048 |                             |           |                                             | <i>Nocardopsis</i> sp. JB363 |           |                                                       | Identity/Similarity |
|---------------------------------|-----------------------------|-----------|---------------------------------------------|------------------------------|-----------|-------------------------------------------------------|---------------------|
| Gene                            | Locus Tag                   | Size [aa] | Annotated function                          | Locus Tag                    | Size [aa] | Annotated function                                    |                     |
| <i>nocA</i>                     | D471_RS0121390              | 435       | Aspartate kinase                            | BQ8420_20030                 | 433       | Aspartokinase                                         | 53.5/64.2           |
| <i>nocB</i>                     | D471_RS0121385              | 273       | Hypothetical protein                        | BQ8420_20035                 | 273       | 2-amino-3,7-dideoxy-D-threo-hept-6-ulosonate synthase | 72.9/83.2           |
| <i>nocC</i>                     | D471_RS0121380              | 366       | 3-dehydroquinate synthase II family protein | BQ8420_20040                 | 366       | 3,7-dideoxy-D-threo-hepto-2,6-diulosonate synthase    | 84.2/91.6           |
| <i>nocD</i>                     | D471_RS0121375              | 305       | Tyrosinase family protein                   | BQ8420_20045                 | 304       | Putative tyrosinase                                   | 80.3/87.9           |
| <i>nocE</i>                     | D471_RS0121365              | 108       | Hypothetical protein                        | BQ8420_20050                 | 99        | Tyrosinase cofactor                                   | 49.5/61.6           |
| <i>nocF</i>                     | D471_RS0121365              | 461       | MFS transporter                             | BQ8420_20055                 | 426       | Major facilitator family transporter                  | 65.2/76.6           |
| <i>nocG</i>                     | D471_RS0121360              | 470       | FAD-binding oxidoreductase                  | BQ8420_20060                 | 470       | FAD-dependent oxygenase                               | 63.7/76.6           |
| <i>nocH</i>                     | D471_RS0121360              | 222       | AfsR/SARP family transcriptional regulator  | BQ8420_20065                 | 234       | Putative regulatory protein (AfsR-like protein)       | 61.7/74.8           |
| <i>nocI</i>                     | D471_RS0121350              | 381       | helix-turn-helix transcriptional regulator  | BQ8420_20070                 | 376       | HTH luxR-type domain-containing protein               | 69.0/78.0           |
| <i>nocJ</i>                     | D471_RS0121345              | 364       | AMP-binding protein                         | BQ8420_20075                 | 363       | EhpF                                                  | 70.3/80.2           |
| <i>nocK</i>                     | D471_RS35455-D471_RS0121335 | 369       |                                             | BQ8420_20080                 | 454       | Aldehyde dehydrogenase                                | 61.9/71.8           |
| <i>nocL</i>                     | D471_RS0121330              | 351       | NAD(P)-dependent Alcohol dehydrogenase      | BQ8420_20085                 | 335       | Alcohol dehydrogenase                                 | 65.8/79.6           |
| <i>nocM</i>                     | D471_RS0121325              | 253       | Amidohydrolase family protein               | BQ8420_20090                 | 251       | Amidohydro-rel domain-containing protein              | 67.9/75.8           |
| <i>nocN</i>                     | D471_RS0121320              | 437       | Phenylacetate--CoA ligase family protein    | BQ8420_20095                 | 439       | Phenylacetate-coenzyme A ligase                       | 65.7/73.0           |

## Author contributions

Research design: C.H.  
 Conceptualization E.M., T.H.,  
 Cloning and genetic manipulation of *Clostridium* spp.: T.H., E.M.  
 Ribosome engineering: E.M.  
 Optimization of extraction, fermentation: T.H., E.M.  
 Isolation and structure elucidation: T.H., K.S., K.D.  
 Synthesis of authentic references and probes: V.H., J.F.  
 Bioinformatics analyses, gene cluster identification, SSN: T.H., K.D.  
 Cloning and heterologous expression: F.B.  
 Precursor directed biosynthesis: F.B., T.H.  
 Bioassays: T.H., E.M.  
 Compiling data, writing paper, figures: T.H., E.M., F.B., V.H.  
 Supervision, writing – Review and Editing: C.H.

## References

- [1] W. Higashide, Y. Li, Y. Yang, J. C. Liao, *Appl. Environ. Microbiol.* **2011**, *77*, 2727-2733.
- [2] G.-z. Cui, W. Hong, J. Zhang, W.-l. Li, Y. Feng, Y.-j. Liu, Q. Cui, *J. Microbiol. Methods* **2012**, *89*, 201-208.
- [3] T. Lincke, S. Behnken, K. Ishida, M. Roth, C. Hertweck, *Angew. Chem. Int. Ed.* **2010**, *49*, 2011-2013.
- [4] P. J. Rutledge, G. L. Challis, *Nat. Rev. Microbiol.* **2015**, *13*, 509-523.
- [5] a) H. Aubry-Damon, C.-J. Soussy, P. Courvalin, *Antimicrob. Agents Chemother.* **1998**, *42*, 2590-2594; b) B. P. Goldstein, *J. Antibiot.* **2014**, *67*, 625-630.
- [6] K. L. Dunbar, H. Büttner, E. M. Molloy, M. Dell, J. Kumpfmüller, C. Hertweck, *Angew. Chem. Int. Ed.* **2018**, *57*, 14080-14084.
- [7] K. Blin, L. E. Pedersen, T. Weber, S. Y. Lee, *Synth. Syst. Biotechnol.* **2016**, *1*, 118-121.
- [8] G. R. Fulmer, A. J. Miller, N. H. Sherden, H. E. Gottlieb, A. Nudelman, B. M. Stoltz, J. E. Bercaw, K. I. Goldberg, *Organometallics* **2010**, *29*, 2176-2179.
- [9] G. M. Boratyn, A. A. Schäffer, R. Agarwala, S. F. Altschul, D. J. Lipman, T. L. Madden, *Biol. Direct* **2012**, *7*, 12.
- [10] L. Zimmermann, A. Stephens, S.-Z. Nam, D. Rau, J. Kübler, M. Lozajic, F. Gabler, J. Söding, A. N. Lupas, V. Alva, *J. Mol. Biol.* **2018**, *430*, 2237-2243.
- [11] F. Madeira, M. Pearce, A. Tivey, P. Basutkar, J. Lee, O. Edbali, N. Madhusoodanan, A. Kolesnikov, R. Lopez, *Nucleic Acids Res.*, DOI: 10.1093/nar/gkac240.
- [12] R. Zallot, N. Oberg, J. A. Gerlt, *Biochemistry* **2019**, *58*, 4169-4182.
- [13] P. Shannon, A. Markiel, O. Ozier, N. S. Baliga, J. T. Wang, D. Ramage, N. Amin, B. Schwikowski, T. Ideker, *Genome Res.* **2003**, *13*, 2498-2504.
- [14] H. Song, C. Rao, Z. Deng, Y. Yu, J. H. Naismith, *Angew. Chem. Int. Ed.* **2020**, *59*, 6054-6061.
- [15] M. Sun, X. Zhang, H. Hao, W. Li, C. Lu, *J. Nat. Prod.* **2015**, *78*, 2123-2127.
- [16] H. Suzuki, Y. Ohnishi, Y. Furusho, S. Sakuda, S. Horinouchi, *J. Biol. Chem.* **2006**, *281*, 36944-36951.
- [17] A. K. Bera, V. Atanasova, S. Gamage, H. Robinson, J. F. Parsons, *Acta Crystallogr. Sect. D: Biol. Crystallogr.* **2010**, *66*, 664-672.
- [18] L. Q. Song, Y. Y. Zhang, J. Y. Pu, M. C. Tang, C. Peng, G. L. Tang, *Angew. Chem. Int. Ed.* **2017**, *129*, 9244-9248.
- [19] Y. Wang, F. Zhai, Y. Hasebe, H. Jia, Z. Zhang, *Bioelectrochemistry* **2018**, *122*, 174-182.
- [20] C. Cano - Prieto, R. García - Salcedo, M. Sánchez - Hidalgo, A. F. Braña, H. P. Fiedler, C. Méndez, J. A. Salas, C. Olano, *ChemBioChem* **2015**, *16*, 1461-1473.
